# Supplementary material for: Characterization and Potential Function Analysis of the SRS Gene Family in Brassica napus
Source: Genes (Basel). 2023 Jul 10;14(7):1421. doi: 10.3390/genes14071421 (PMC10379590; doi:10.3390/genes14071421)
Supplement: Supplementary file 1 [file genes-14-01421-s001.zip › genes-2479561 supplementary tables.xlsx]

## Sheet: Table S1
Table S1. Characteristics of physicochemical properties of the BnSRS genes.
Gene ID	Sequence ID	Number of amino acid	Exon number	Group	Molecular weight	Isoelectric point	Instability index	Aliphaticindex	Grand average of hydropathicity	Duplication type	Subcellular Location
BnaA01g01350D	BnSRS1	313	2	II	33741.5	5.82	65.48	38.95	-0.897	WGD or segmental	Nucleus
BnaA01g19680D	BnSRS2	235	1	II	25203.9	9.13	63.4	52	-0.715	WGD or segmental	Nucleus
BnaA02g17280D	BnSRS3	342	2	III	38108.7	6.8	48.9	55.38	-0.859	WGD or segmental	Nucleus
BnaA03g59180D	BnSRS4	315	2	II	34159.3	7.66	63.44	42.41	-0.856	Dispersed	Nucleus
BnaA04g04120D	BnSRS5	201	4	I	22303.1	9.41	62.85	66.42	-0.728	WGD or segmental	Chloroplast
BnaA04g12150D	BnSRS6	190	2	III	21294.2	9.2	56.91	60.53	-0.587	WGD or segmental	Nucleus
BnaA06g13970D	BnSRS7	346	2	III	37911.2	6.19	61.1	51.36	-0.794	WGD or segmental	Nucleus
BnaA07g01860D	BnSRS8	219	2	II	24394.9	7.02	59.61	45.39	-0.896	WGD or segmental	Nucleus
BnaA07g12710D	BnSRS9	335	2	II	35368.8	8.24	53.1	53.31	-0.633	WGD or segmental	Nucleus
BnaA07g21650D	BnSRS10	331	2	III	36698.4	7.67	51.2	56.31	-0.759	WGD or segmental	Nucleus
BnaA09g31700D	BnSRS11	245	1	II	26245.1	9.26	58.81	54.24	-0.669	WGD or segmental	Nucleus
BnaA09g34300D	BnSRS12	311	4	I	34360.9	9.49	52.32	73.31	-0.443	WGD or segmental	Nucleus
BnaA09g43210D	BnSRS13	180	3	III	20709.7	9.69	64.69	67.11	-0.703	WGD or segmental	Nucleus
BnaA10g20370D	BnSRS14	307	2	IV	32740.9	8.6	43.65	52.44	-0.7	WGD or segmental	Nucleus
BnaAnng09150D	BnSRS15	344	3	III	38249.9	6.8	46.52	57.33	-0.874	WGD or segmental	Nucleus
BnaAnng31570D	BnSRS16	345	2	III	38329.8	6.3	45.92	53.16	-0.891	Dispersed	Nucleus
BnaC01g02360D	BnSRS17	252	3	II	28088.7	6.04	68.46	47.58	-0.884	WGD or segmental	Nucleus
BnaC01g31760D	BnSRS18	212	5	III	24399	5.56	56.99	84.58	-0.346	Dispersed	Nucleus
BnaC02g11580D	BnSRS19	219	2	II	24366.9	7.57	59.22	44.52	-0.909	Dispersed	Nucleus
BnaC02g24360D	BnSRS20	343	2	III	38294.9	6.65	50.52	54.93	-0.877	WGD or segmental	Nucleus
BnaC04g26320D	BnSRS21	218	3	I	24686	9.69	61.62	64.36	-0.75	WGD or segmental	Chloroplast
BnaC06g22330D	BnSRS22	335	2	III	37220	7.67	51.92	54.18	-0.795	WGD or segmental	Nucleus
BnaC06g43960D	BnSRS23	345	2	III	38310.8	6.2	46.26	55.13	-0.871	Dispersed	Nucleus
BnaC07g03690D	BnSRS24	215	2	II	23906.6	8.3	55.19	53.95	-0.74	WGD or segmental	Nucleus
BnaC07g05440D	BnSRS25	297	5	III	33120.1	6.37	47.47	63.4	-0.658	Dispersed	Nucleus
BnaC07g15630D	BnSRS26	335	3	III	36713.3	6.72	59.78	52.18	-0.773	Dispersed	Nucleus
BnaC07g16800D	BnSRS27	338	2	II	35665.2	8.45	54.7	52.54	-0.619	WGD or segmental	Nucleus
BnaC08g25250D	BnSRS28	314	5	I	34792.5	9.22	52.84	74.14	-0.396	WGD or segmental	Vacuolar
BnaC08g35730D	BnSRS29	130	2	III	15283.6	10.06	55.34	48	-0.93	WGD or segmental	Nucleus
BnaC08g48470D	BnSRS30	150	2	II	15066.5	4.56	48.36	63.73	-0.047	Dispersed	Chloroplast
BnaC09g44400D	BnSRS31	303	2	IV	32217.4	8.76	42.17	53.43	-0.665	WGD or segmental	Nucleus
BnaCnng57210D	BnSRS32	346	2	III	37835.2	6.19	60.54	52.49	-0.766	Dispersed	Nucleus
BnaCnng61180D	BnSRS33	313	2	II	33691.9	7.67	63.31	44.86	-0.835	Dispersed	Nucleus
BnaCnng70210D	BnSRS34	327	2	IV	34395.8	9.26	47.65	56.51	-0.493	Dispersed	Nucleus

## Sheet: Table S2
Table S2. Ka/Ks analysis for duolicated gene pairs of BnSRS genes.
Gene1 ID	Gene2 ID	Ka value	Ks value	Ka/Ks value
BnSRS1	BnSRS17	0.0258535	0.062897	0.411045
BnSRS2	BnSRS11	0.0283549	0.216222	0.131138
BnSRS3	BnSRS20	0.00503252	0.0312778	0.160898
BnSRS5	BnSRS12	0.186912	0.509766	0.366662
BnSRS5	BnSRS21	0.0754525	0.214809	0.351254
BnSRS5	BnSRS28	0.19174	0.503376	0.380907
BnSRS6	BnSRS13	0.163789	0.330368	0.495778
BnSRS6	BnSRS29	0.131536	0.37366	0.35202
BnSRS7	BnSRS15	0.166836	1.28399	0.129936
BnSRS8	BnSRS24	0.039409	0.0486888	0.809407
BnSRS9	BnSRS27	0.0286574	0.0628981	0.455617
BnSRS10	BnSRS22	0.00917643	0.027091	0.338726
BnSRS12	BnSRS21	0.102216	0.466852	0.218947
BnSRS12	BnSRS28	0.0178749	0.0637834	0.280244
BnSRS13	BnSRS29	0.148957	0.17831	0.835382
BnSRS14	BnSRS31	0.0101832	0.0983807	0.103508
BnSRS15	BnSRS22	0.0609541	0.203602	0.299379
BnSRS17	BnSRS24	0.258276	0.850981	0.303504

## Sheet: Table S3
		Table S3. The position of cis-acting regulatory elements of BnSRS genes.
		Gene ID	Cis-acting regulatory element	Sequence	Start	Function
		BnSRS26	3-AF1 binding site	TAAGAGAGGAA	1187	light responsive
		BnSRS32	AAAC-motif	CAATCAAAACCT	435	light responsive
		BnSRS25	AACA_motif	TAACAAACTCCA	1365	endosperm expression
		BnSRS15	ABRE	GACACGTGGC	1233	abscisic acid responsive
		BnSRS16	ABRE	GACACGTGGC	1234	abscisic acid responsive
		BnSRS19	ABRE	GACACGTGGC	1571	abscisic acid responsive
		BnSRS23	ABRE	GACACGTGGC	1211	abscisic acid responsive
		BnSRS26	ABRE	GACACGTGGC	1436	abscisic acid responsive
		BnSRS4	ABRE	GACACGTGGC	1374	abscisic acid responsive
		BnSRS8	ABRE	GACACGTGGC	1571	abscisic acid responsive
		BnSRS1	ABRE	GCCGCGTGGC	948	abscisic acid responsive
		BnSRS17	ABRE	GCCGCGTGGC	1327	abscisic acid responsive
		BnSRS18	ABRE	GACACGTACGT	864	abscisic acid responsive
		BnSRS2	ABRE	TACGTGTC	884	abscisic acid responsive
		BnSRS31	ABRE	GACACGTACGT	1016	abscisic acid responsive
		BnSRS4	ABRE	GCCGCGTGGC	1677	abscisic acid responsive
		BnSRS6	ABRE	TACGTGTC	878	abscisic acid responsive
		BnSRS13	ABRE	CGTACGTGCA	657	abscisic acid responsive
		BnSRS20	ABRE	CGTACGTGCA	842	abscisic acid responsive
		BnSRS22	ABRE	CGTACGTGCA	881	abscisic acid responsive
		BnSRS30	ABRE	GCAACGTGTC	1425	abscisic acid responsive
		BnSRS7	ABRE	GCAACGTGTC	1390	abscisic acid responsive
		BnSRS1	ABRE	CACGTG	950	abscisic acid responsive
		BnSRS1	ABRE	ACGTG	951	abscisic acid responsive
		BnSRS10	ABRE	ACGTG	245	abscisic acid responsive
		BnSRS10	ABRE	ACGTG	741	abscisic acid responsive
		BnSRS10	ABRE	ACGTG	1235	abscisic acid responsive
		BnSRS11	ABRE	ACGTG	1438	abscisic acid responsive
		BnSRS11	ABRE	AACCCGG	1835	abscisic acid responsive
		BnSRS13	ABRE	ACGTG	78	abscisic acid responsive
		BnSRS13	ABRE	ACGTG	161	abscisic acid responsive
		BnSRS13	ABRE	ACGTG	219	abscisic acid responsive
		BnSRS13	ABRE	CACGTG	449	abscisic acid responsive
		BnSRS13	ABRE	ACGTG	450	abscisic acid responsive
		BnSRS13	ABRE	ACGTG	913	abscisic acid responsive
		BnSRS13	ABRE	ACGTG	996	abscisic acid responsive
		BnSRS13	ABRE	ACGTG	1054	abscisic acid responsive
		BnSRS13	ABRE	ACGTG	1472	abscisic acid responsive
		BnSRS14	ABRE	ACGTG	464	abscisic acid responsive
		BnSRS14	ABRE	CACGTG	682	abscisic acid responsive
		BnSRS14	ABRE	ACGTG	683	abscisic acid responsive
		BnSRS14	ABRE	CACGTG	864	abscisic acid responsive
		BnSRS14	ABRE	ACGTG	865	abscisic acid responsive
		BnSRS15	ABRE	ACGTG	833	abscisic acid responsive
		BnSRS15	ABRE	ACGTG	885	abscisic acid responsive
		BnSRS15	ABRE	CACGTG	1235	abscisic acid responsive
		BnSRS15	ABRE	ACGTG	1236	abscisic acid responsive
		BnSRS16	ABRE	ACGTG	211	abscisic acid responsive
		BnSRS16	ABRE	AACCCGG	375	abscisic acid responsive
		BnSRS16	ABRE	CACGTG	1236	abscisic acid responsive
		BnSRS16	ABRE	ACGTG	1237	abscisic acid responsive
		BnSRS17	ABRE	CACGTG	1329	abscisic acid responsive
		BnSRS17	ABRE	ACGTG	1330	abscisic acid responsive
		BnSRS18	ABRE	ACGTG	1416	abscisic acid responsive
		BnSRS19	ABRE	CACGTG	1573	abscisic acid responsive
		BnSRS19	ABRE	ACGTG	1574	abscisic acid responsive
		BnSRS2	ABRE	ACGTG	615	abscisic acid responsive
		BnSRS2	ABRE	ACGTG	885	abscisic acid responsive
		BnSRS20	ABRE	ACGTG	171	abscisic acid responsive
		BnSRS20	ABRE	ACGTG	222	abscisic acid responsive
		BnSRS20	ABRE	ACGTG	334	abscisic acid responsive
		BnSRS20	ABRE	CACGTG	515	abscisic acid responsive
		BnSRS20	ABRE	ACGTG	516	abscisic acid responsive
		BnSRS22	ABRE	ACGTG	489	abscisic acid responsive
		BnSRS22	ABRE	ACGTG	883	abscisic acid responsive
		BnSRS23	ABRE	ACGTG	82	abscisic acid responsive
		BnSRS23	ABRE	ACGTG	433	abscisic acid responsive
		BnSRS23	ABRE	ACGTG	784	abscisic acid responsive
		BnSRS23	ABRE	CACGTG	1213	abscisic acid responsive
		BnSRS23	ABRE	ACGTG	1214	abscisic acid responsive
		BnSRS24	ABRE	ACGTG	1337	abscisic acid responsive
		BnSRS25	ABRE	ACGTG	93	abscisic acid responsive
		BnSRS25	ABRE	ACGTG	903	abscisic acid responsive
		BnSRS25	ABRE	ACGTG	1526	abscisic acid responsive
		BnSRS25	ABRE	CACGTG	1843	abscisic acid responsive
		BnSRS25	ABRE	ACGTG	1844	abscisic acid responsive
		BnSRS26	ABRE	CACGTG	1438	abscisic acid responsive
		BnSRS26	ABRE	ACGTG	1439	abscisic acid responsive
		BnSRS26	ABRE	ACGTG	1470	abscisic acid responsive
		BnSRS27	ABRE	ACGTG	1525	abscisic acid responsive
		BnSRS29	ABRE	ACGTG	1158	abscisic acid responsive
		BnSRS29	ABRE	ACGTG	1297	abscisic acid responsive
		BnSRS29	ABRE	ACGTG	1476	abscisic acid responsive
		BnSRS3	ABRE	ACGTG	1055	abscisic acid responsive
		BnSRS3	ABRE	ACGTG	1110	abscisic acid responsive
		BnSRS30	ABRE	CACGTG	444	abscisic acid responsive
		BnSRS30	ABRE	ACGTG	445	abscisic acid responsive
		BnSRS30	ABRE	ACGTG	567	abscisic acid responsive
		BnSRS30	ABRE	ACGTG	825	abscisic acid responsive
		BnSRS30	ABRE	ACGTG	1428	abscisic acid responsive
		BnSRS31	ABRE	TACGGTC	631	abscisic acid responsive
		BnSRS31	ABRE	CACGTG	937	abscisic acid responsive
		BnSRS31	ABRE	ACGTG	938	abscisic acid responsive
		BnSRS33	ABRE	AACCCGG	119	abscisic acid responsive
		BnSRS34	ABRE	ACGTG	1543	abscisic acid responsive
		BnSRS34	ABRE	ACGTG	1699	abscisic acid responsive
		BnSRS4	ABRE	ACGTG	245	abscisic acid responsive
		BnSRS4	ABRE	CACGTG	1376	abscisic acid responsive
		BnSRS4	ABRE	ACGTG	1377	abscisic acid responsive
		BnSRS6	ABRE	ACGTG	402	abscisic acid responsive
		BnSRS6	ABRE	ACGTG	633	abscisic acid responsive
		BnSRS6	ABRE	ACGTG	880	abscisic acid responsive
		BnSRS7	ABRE	CACGTG	1392	abscisic acid responsive
		BnSRS7	ABRE	ACGTG	1393	abscisic acid responsive
		BnSRS8	ABRE	CACGTG	1573	abscisic acid responsive
		BnSRS8	ABRE	ACGTG	1574	abscisic acid responsive
		BnSRS9	ABRE	ACGTG	1595	abscisic acid responsive
		BnSRS10	ACE	CTAACGTATT	566	light responsive
		BnSRS12	ACE	CTAACGTATT	946	light responsive
		BnSRS13	ACE	CTAACGTATT	135	light responsive
		BnSRS13	ACE	CTAACGTATT	970	light responsive
		BnSRS25	ACE	CTAACGTATT	1710	light responsive
		BnSRS27	ACE	GACACGTATG	1522	light responsive
		BnSRS29	ACE	CTAACGTATT	1213	light responsive
		BnSRS34	ACE	CTAACGTATT	1100	light responsive
		BnSRS6	ACE	GACACGTATG	878	light responsive
		BnSRS1	ARE	AAACCA	1229	anaerobic induction
		BnSRS1	ARE	AAACCA	1577	anaerobic induction
		BnSRS10	ARE	AAACCA	23	anaerobic induction
		BnSRS10	ARE	AAACCA	524	anaerobic induction
		BnSRS12	ARE	AAACCA	126	anaerobic induction
		BnSRS12	ARE	AAACCA	1799	anaerobic induction
		BnSRS13	ARE	AAACCA	360	anaerobic induction
		BnSRS13	ARE	AAACCA	375	anaerobic induction
		BnSRS13	ARE	AAACCA	646	anaerobic induction
		BnSRS14	ARE	AAACCA	384	anaerobic induction
		BnSRS14	ARE	AAACCA	696	anaerobic induction
		BnSRS14	ARE	AAACCA	1922	anaerobic induction
		BnSRS15	ARE	AAACCA	259	anaerobic induction
		BnSRS15	ARE	AAACCA	326	anaerobic induction
		BnSRS15	ARE	AAACCA	417	anaerobic induction
		BnSRS15	ARE	AAACCA	469	anaerobic induction
		BnSRS15	ARE	AAACCA	956	anaerobic induction
		BnSRS17	ARE	AAACCA	611	anaerobic induction
		BnSRS17	ARE	AAACCA	1605	anaerobic induction
		BnSRS18	ARE	AAACCA	1272	anaerobic induction
		BnSRS18	ARE	AAACCA	1876	anaerobic induction
		BnSRS19	ARE	AAACCA	258	anaerobic induction
		BnSRS19	ARE	AAACCA	1210	anaerobic induction
		BnSRS19	ARE	AAACCA	1400	anaerobic induction
		BnSRS19	ARE	AAACCA	1693	anaerobic induction
		BnSRS19	ARE	AAACCA	1737	anaerobic induction
		BnSRS21	ARE	AAACCA	479	anaerobic induction
		BnSRS21	ARE	AAACCA	1782	anaerobic induction
		BnSRS22	ARE	AAACCA	271	anaerobic induction
		BnSRS23	ARE	AAACCA	243	anaerobic induction
		BnSRS23	ARE	AAACCA	302	anaerobic induction
		BnSRS23	ARE	AAACCA	594	anaerobic induction
		BnSRS23	ARE	AAACCA	653	anaerobic induction
		BnSRS23	ARE	AAACCA	945	anaerobic induction
		BnSRS23	ARE	AAACCA	1004	anaerobic induction
		BnSRS24	ARE	AAACCA	163	anaerobic induction
		BnSRS24	ARE	AAACCA	1694	anaerobic induction
		BnSRS24	ARE	AAACCA	1737	anaerobic induction
		BnSRS25	ARE	AAACCA	1429	anaerobic induction
		BnSRS25	ARE	AAACCA	1839	anaerobic induction
		BnSRS26	ARE	AAACCA	358	anaerobic induction
		BnSRS26	ARE	AAACCA	1665	anaerobic induction
		BnSRS27	ARE	AAACCA	1281	anaerobic induction
		BnSRS28	ARE	AAACCA	1570	anaerobic induction
		BnSRS29	ARE	AAACCA	150	anaerobic induction
		BnSRS29	ARE	AAACCA	371	anaerobic induction
		BnSRS29	ARE	AAACCA	1073	anaerobic induction
		BnSRS3	ARE	AAACCA	1051	anaerobic induction
		BnSRS3	ARE	AAACCA	1083	anaerobic induction
		BnSRS3	ARE	AAACCA	1516	anaerobic induction
		BnSRS30	ARE	AAACCA	114	anaerobic induction
		BnSRS30	ARE	AAACCA	259	anaerobic induction
		BnSRS30	ARE	AAACCA	274	anaerobic induction
		BnSRS31	ARE	AAACCA	146	anaerobic induction
		BnSRS31	ARE	AAACCA	951	anaerobic induction
		BnSRS31	ARE	AAACCA	1181	anaerobic induction
		BnSRS31	ARE	AAACCA	1922	anaerobic induction
		BnSRS32	ARE	AAACCA	441	anaerobic induction
		BnSRS32	ARE	AAACCA	518	anaerobic induction
		BnSRS32	ARE	AAACCA	1023	anaerobic induction
		BnSRS33	ARE	AAACCA	1440	anaerobic induction
		BnSRS33	ARE	AAACCA	1484	anaerobic induction
		BnSRS33	ARE	AAACCA	1624	anaerobic induction
		BnSRS33	ARE	AAACCA	1658	anaerobic induction
		BnSRS4	ARE	AAACCA	1581	anaerobic induction
		BnSRS5	ARE	AAACCA	427	anaerobic induction
		BnSRS5	ARE	AAACCA	1733	anaerobic induction
		BnSRS5	ARE	AAACCA	1766	anaerobic induction
		BnSRS6	ARE	AAACCA	678	anaerobic induction
		BnSRS6	ARE	AAACCA	907	anaerobic induction
		BnSRS6	ARE	AAACCA	1166	anaerobic induction
		BnSRS6	ARE	AAACCA	1332	anaerobic induction
		BnSRS6	ARE	AAACCA	1539	anaerobic induction
		BnSRS7	ARE	AAACCA	46	anaerobic induction
		BnSRS8	ARE	AAACCA	258	anaerobic induction
		BnSRS8	ARE	AAACCA	1210	anaerobic induction
		BnSRS8	ARE	AAACCA	1400	anaerobic induction
		BnSRS8	ARE	AAACCA	1693	anaerobic induction
		BnSRS8	ARE	AAACCA	1737	anaerobic induction
		BnSRS9	ARE	AAACCA	1350	anaerobic induction
		BnSRS9	ARE	AAACCA	1877	anaerobic induction
		BnSRS1	AuxRR-core	GGTCCAT	965	auxin-responsive
		BnSRS1	AuxRR-core	GGTCCAT	1313	auxin-responsive
		BnSRS14	AuxRR-core	GGTCCAT	1902	auxin-responsive
		BnSRS17	AuxRR-core	GGTCCAT	1344	auxin-responsive
		BnSRS27	AuxRR-core	GGTCCAT	875	auxin-responsive
		BnSRS31	AuxRR-core	GGTCCAT	1902	auxin-responsive
		BnSRS5	AuxRR-core	GGTCCAT	839	auxin-responsive
		BnSRS7	AuxRR-core	GGTCCAT	289	auxin-responsive
		BnSRS1	CAT-box	GCCACT	941	meristem expression
		BnSRS10	CAT-box	GCCACT	914	meristem expression
		BnSRS16	CAT-box	GCCACT	567	meristem expression
		BnSRS19	CAT-box	GCCACT	686	meristem expression
		BnSRS21	CAT-box	GCCACT	1907	meristem expression
		BnSRS24	CAT-box	GCCACT	1367	meristem expression
		BnSRS25	CAT-box	GCCACT	716	meristem expression
		BnSRS33	CAT-box	GCCACT	1278	meristem expression
		BnSRS34	CAT-box	GCCACT	164	meristem expression
		BnSRS5	CAT-box	GCCACT	1901	meristem expression
		BnSRS6	CAT-box	GCCACT	1094	meristem expression
		BnSRS8	CAT-box	GCCACT	686	meristem expression
		BnSRS10	CGTCA-motif	CGTCA	1322	MeJA-responsive
		BnSRS10	CGTCA-motif	CGTCA	1347	MeJA-responsive
		BnSRS13	CGTCA-motif	CGTCA	221	MeJA-responsive
		BnSRS13	CGTCA-motif	CGTCA	1056	MeJA-responsive
		BnSRS13	CGTCA-motif	CGTCA	1610	MeJA-responsive
		BnSRS14	CGTCA-motif	CGTCA	1128	MeJA-responsive
		BnSRS15	CGTCA-motif	CGTCA	985	MeJA-responsive
		BnSRS15	CGTCA-motif	CGTCA	1009	MeJA-responsive
		BnSRS16	CGTCA-motif	CGTCA	317	MeJA-responsive
		BnSRS16	CGTCA-motif	CGTCA	402	MeJA-responsive
		BnSRS17	CGTCA-motif	CGTCA	553	MeJA-responsive
		BnSRS18	CGTCA-motif	CGTCA	128	MeJA-responsive
		BnSRS18	CGTCA-motif	CGTCA	825	MeJA-responsive
		BnSRS19	CGTCA-motif	CGTCA	1826	MeJA-responsive
		BnSRS2	CGTCA-motif	CGTCA	1193	MeJA-responsive
		BnSRS20	CGTCA-motif	CGTCA	257	MeJA-responsive
		BnSRS20	CGTCA-motif	CGTCA	313	MeJA-responsive
		BnSRS20	CGTCA-motif	CGTCA	337	MeJA-responsive
		BnSRS21	CGTCA-motif	CGTCA	50	MeJA-responsive
		BnSRS22	CGTCA-motif	CGTCA	969	MeJA-responsive
		BnSRS22	CGTCA-motif	CGTCA	994	MeJA-responsive
		BnSRS22	CGTCA-motif	CGTCA	1518	MeJA-responsive
		BnSRS22	CGTCA-motif	CGTCA	1856	MeJA-responsive
		BnSRS23	CGTCA-motif	CGTCA	250	MeJA-responsive
		BnSRS23	CGTCA-motif	CGTCA	601	MeJA-responsive
		BnSRS23	CGTCA-motif	CGTCA	952	MeJA-responsive
		BnSRS24	CGTCA-motif	CGTCA	382	MeJA-responsive
		BnSRS24	CGTCA-motif	CGTCA	765	MeJA-responsive
		BnSRS24	CGTCA-motif	CGTCA	1136	MeJA-responsive
		BnSRS24	CGTCA-motif	CGTCA	1826	MeJA-responsive
		BnSRS25	CGTCA-motif	CGTCA	1236	MeJA-responsive
		BnSRS25	CGTCA-motif	CGTCA	1259	MeJA-responsive
		BnSRS26	CGTCA-motif	CGTCA	1468	MeJA-responsive
		BnSRS26	CGTCA-motif	CGTCA	1792	MeJA-responsive
		BnSRS27	CGTCA-motif	CGTCA	409	MeJA-responsive
		BnSRS29	CGTCA-motif	CGTCA	454	MeJA-responsive
		BnSRS29	CGTCA-motif	CGTCA	624	MeJA-responsive
		BnSRS29	CGTCA-motif	CGTCA	1299	MeJA-responsive
		BnSRS29	CGTCA-motif	CGTCA	1613	MeJA-responsive
		BnSRS3	CGTCA-motif	CGTCA	274	MeJA-responsive
		BnSRS30	CGTCA-motif	CGTCA	189	MeJA-responsive
		BnSRS30	CGTCA-motif	CGTCA	451	MeJA-responsive
		BnSRS30	CGTCA-motif	CGTCA	637	MeJA-responsive
		BnSRS30	CGTCA-motif	CGTCA	823	MeJA-responsive
		BnSRS31	CGTCA-motif	CGTCA	1158	MeJA-responsive
		BnSRS32	CGTCA-motif	CGTCA	224	MeJA-responsive
		BnSRS34	CGTCA-motif	CGTCA	317	MeJA-responsive
		BnSRS34	CGTCA-motif	CGTCA	320	MeJA-responsive
		BnSRS34	CGTCA-motif	CGTCA	358	MeJA-responsive
		BnSRS34	CGTCA-motif	CGTCA	585	MeJA-responsive
		BnSRS4	CGTCA-motif	CGTCA	1240	MeJA-responsive
		BnSRS7	CGTCA-motif	CGTCA	249	MeJA-responsive
		BnSRS7	CGTCA-motif	CGTCA	276	MeJA-responsive
		BnSRS7	CGTCA-motif	CGTCA	296	MeJA-responsive
		BnSRS7	CGTCA-motif	CGTCA	400	MeJA-responsive
		BnSRS8	CGTCA-motif	CGTCA	1826	MeJA-responsive
		BnSRS10	circadian	CAAAGATATC	1966	circadian control
		BnSRS15	circadian	CAAAGATATC	1966	circadian control
		BnSRS16	circadian	CAAAGATATC	1966	circadian control
		BnSRS20	circadian	CAAAGATATC	1014	circadian control
		BnSRS20	circadian	CAAAGATATC	1966	circadian control
		BnSRS22	circadian	CAAAGATATC	1966	circadian control
		BnSRS23	circadian	CAAAGATATC	1966	circadian control
		BnSRS25	circadian	CAAAGATATC	968	circadian control
		BnSRS26	circadian	CAAAGATATC	169	circadian control
		BnSRS3	circadian	CAAAGATATC	187	circadian control
		BnSRS10	G-box	CACGAC	61	light responsive
		BnSRS11	G-box	CACGTC	1437	light responsive
		BnSRS12	G-box	CACGAC	1763	light responsive
		BnSRS13	G-box	CACGTC	219	light responsive
		BnSRS13	G-box	CACGTC	1054	light responsive
		BnSRS19	G-box	CACGAC	1616	light responsive
		BnSRS2	G-box	CACGAC	2003	light responsive
		BnSRS24	G-box	CACGAC	1617	light responsive
		BnSRS25	G-box	CACGTC	92	light responsive
		BnSRS26	G-box	CACGTC	1469	light responsive
		BnSRS28	G-box	CACGAC	1813	light responsive
		BnSRS29	G-box	CACGTC	1297	light responsive
		BnSRS30	G-box	CACGTC	824	light responsive
		BnSRS6	G-box	CACGTC	633	light responsive
		BnSRS7	G-box	CACGAC	238	light responsive
		BnSRS8	G-box	CACGAC	1616	light responsive
		BnSRS9	G-box	CACGTC	1594	light responsive
		BnSRS1	G-Box	CACGTG	950	light responsive
		BnSRS10	G-Box	CACGTT	244	light responsive
		BnSRS10	G-Box	CACGTT	1235	light responsive
		BnSRS13	G-Box	CACGTG	449	light responsive
		BnSRS14	G-Box	CACGTGAAA	679	light responsive
		BnSRS14	G-Box	CACGTG	682	light responsive
		BnSRS14	G-Box	CACGTG	864	light responsive
		BnSRS15	G-Box	CACGTG	1235	light responsive
		BnSRS16	G-Box	CACGTT	210	light responsive
		BnSRS16	G-Box	CACGTG	1236	light responsive
		BnSRS17	G-Box	CACGTG	1329	light responsive
		BnSRS19	G-Box	CACGTG	1573	light responsive
		BnSRS20	G-Box	CACGTT	333	light responsive
		BnSRS20	G-Box	CACGTG	515	light responsive
		BnSRS23	G-Box	CACGTT	81	light responsive
		BnSRS23	G-Box	CACGTT	432	light responsive
		BnSRS23	G-Box	CACGTT	783	light responsive
		BnSRS23	G-Box	CACGTG	1213	light responsive
		BnSRS25	G-Box	CACGTG	1843	light responsive
		BnSRS26	G-Box	CACGTG	1438	light responsive
		BnSRS3	G-Box	CACGTT	1110	light responsive
		BnSRS30	G-Box	CACGTG	444	light responsive
		BnSRS30	G-Box	CACGTT	566	light responsive
		BnSRS30	G-Box	CACGTT	1427	light responsive
		BnSRS31	G-Box	CACGTGAAA	934	light responsive
		BnSRS31	G-Box	CACGTG	937	light responsive
		BnSRS4	G-Box	CACGTT	244	light responsive
		BnSRS4	G-Box	CACGTG	1376	light responsive
		BnSRS6	G-Box	CACGTT	401	light responsive
		BnSRS7	G-Box	CACGTG	1392	light responsive
		BnSRS8	G-Box	CACGTG	1573	light responsive
		BnSRS27	G-box	CAGACGTGGCA	1522	light responsive
		BnSRS9	G-box	CAGACGTGGCA	1592	light responsive
		BnSRS19	G-box	tgACACGTGGCA	1570	light responsive
		BnSRS8	G-box	tgACACGTGGCA	1570	light responsive
		BnSRS15	G-box	TAACACGTAG	1232	light responsive
		BnSRS16	G-box	TAACACGTAG	1233	light responsive
		BnSRS23	G-box	TAACACGTAG	1210	light responsive
		BnSRS24	G-box	TAACACGTAG	1334	light responsive
		BnSRS14	G-box	CCACGTAA	463	light responsive
		BnSRS15	G-box	ACACGTGGC	1234	light responsive
		BnSRS16	G-box	ACACGTGGC	1235	light responsive
		BnSRS20	G-box	CCACGTAA	170	light responsive
		BnSRS23	G-box	ACACGTGGC	1212	light responsive
		BnSRS26	G-box	ACACGTGT	1437	light responsive
		BnSRS7	G-box	ACACGTGGC	1391	light responsive
		BnSRS1	G-box	GCCACGTGGA	948	light responsive
		BnSRS1	G-box	CACGTG	950	light responsive
		BnSRS10	G-box	TACGTG	740	light responsive
		BnSRS13	G-box	TACGTG	78	light responsive
		BnSRS13	G-box	TACGTG	161	light responsive
		BnSRS13	G-box	CACGTG	449	light responsive
		BnSRS13	G-box	TACGTG	913	light responsive
		BnSRS13	G-box	TACGTG	996	light responsive
		BnSRS13	G-box	TACGTG	1472	light responsive
		BnSRS14	G-box	TACGTG	464	light responsive
		BnSRS14	G-box	CACGTG	682	light responsive
		BnSRS14	G-box	CACGTG	864	light responsive
		BnSRS15	G-box	TACGTG	833	light responsive
		BnSRS15	G-box	TACGTG	885	light responsive
		BnSRS15	G-box	CACGTG	1235	light responsive
		BnSRS16	G-box	CACGTG	1236	light responsive
		BnSRS17	G-box	GCCACGTGGA	1327	light responsive
		BnSRS17	G-box	CACGTG	1329	light responsive
		BnSRS18	G-box	TACGTG	1416	light responsive
		BnSRS19	G-box	CACGTG	1573	light responsive
		BnSRS2	G-box	TACGTG	614	light responsive
		BnSRS2	G-box	TACGTG	884	light responsive
		BnSRS20	G-box	TACGTG	171	light responsive
		BnSRS20	G-box	TACGTG	222	light responsive
		BnSRS20	G-box	CACGTG	515	light responsive
		BnSRS22	G-box	TACGTG	488	light responsive
		BnSRS22	G-box	TACGTG	883	light responsive
		BnSRS23	G-box	CACGTG	1213	light responsive
		BnSRS24	G-box	TACGTG	1337	light responsive
		BnSRS25	G-box	TACGTG	902	light responsive
		BnSRS25	G-box	GCCACGTGGA	1359	light responsive
		BnSRS25	G-box	TACGTG	1525	light responsive
		BnSRS25	G-box	GCCACGTGGA	1841	light responsive
		BnSRS25	G-box	CACGTG	1843	light responsive
		BnSRS26	G-box	CACGTG	1438	light responsive
		BnSRS27	G-box	TACGTG	1524	light responsive
		BnSRS29	G-box	TACGTG	1158	light responsive
		BnSRS29	G-box	TACGTG	1476	light responsive
		BnSRS3	G-box	TACGTG	1055	light responsive
		BnSRS30	G-box	GCCACGTGGA	442	light responsive
		BnSRS30	G-box	CACGTG	444	light responsive
		BnSRS31	G-box	CACGTG	937	light responsive
		BnSRS34	G-box	TACGTG	1543	light responsive
		BnSRS34	G-box	TACGTG	1699	light responsive
		BnSRS4	G-box	CACGTG	1376	light responsive
		BnSRS6	G-box	TACGTG	880	light responsive
		BnSRS7	G-box	CACGTG	1392	light responsive
		BnSRS8	G-box	CACGTG	1573	light responsive
		BnSRS1	GC-motif	CCCCCG	1008	anoxic specific inducibility
		BnSRS1	GC-motif	CCCCCG	1356	anoxic specific inducibility
		BnSRS10	GC-motif	CCCCCG	1541	anoxic specific inducibility
		BnSRS15	GC-motif	CCCCCG	1197	anoxic specific inducibility
		BnSRS16	GC-motif	CCCCCG	1198	anoxic specific inducibility
		BnSRS17	GC-motif	CCCCCG	1387	anoxic specific inducibility
		BnSRS20	GC-motif	CCCCCG	477	anoxic specific inducibility
		BnSRS22	GC-motif	CCCCCG	1189	anoxic specific inducibility
		BnSRS23	GC-motif	CCCCCG	1175	anoxic specific inducibility
		BnSRS4	GC-motif	CCCCCG	1433	anoxic specific inducibility
		BnSRS13	GCN4_motif	TGAGTCA	725	endosperm expression
		BnSRS13	GCN4_motif	TGAGTCA	733	endosperm expression
		BnSRS19	GCN4_motif	TGAGTCA	46	endosperm expression
		BnSRS21	GCN4_motif	TGAGTCA	722	endosperm expression
		BnSRS25	GCN4_motif	TGAGTCA	499	endosperm expression
		BnSRS26	GCN4_motif	TGAGTCA	550	endosperm expression
		BnSRS26	GCN4_motif	TGAGTCA	624	endosperm expression
		BnSRS30	GCN4_motif	TGAGTCA	752	endosperm expression
		BnSRS34	GCN4_motif	TGAGTCA	185	endosperm expression
		BnSRS8	GCN4_motif	TGAGTCA	46	endosperm expression
		BnSRS19	GT1-motif	GTGTGTGAA	407	light responsive
		BnSRS8	GT1-motif	GTGTGTGAA	407	light responsive
		BnSRS16	GT1-motif	GGTTAAT	372	light responsive
		BnSRS17	GT1-motif	GGTTAAT	1218	light responsive
		BnSRS18	GT1-motif	GGTTAAT	67	light responsive
		BnSRS19	GT1-motif	GGTTAAT	1350	light responsive
		BnSRS20	GT1-motif	GGTTAAT	774	light responsive
		BnSRS25	GT1-motif	GGTTAAT	951	light responsive
		BnSRS26	GT1-motif	GGTTAAT	246	light responsive
		BnSRS29	GT1-motif	GGTTAAT	42	light responsive
		BnSRS33	GT1-motif	GGTTAAT	398	light responsive
		BnSRS8	GT1-motif	GGTTAAT	1350	light responsive
		BnSRS1	GT1-motif	GGTTAA	313	light responsive
		BnSRS13	GT1-motif	GGTTAA	428	light responsive
		BnSRS13	GT1-motif	GGTTAA	636	light responsive
		BnSRS16	GT1-motif	GGTTAA	373	light responsive
		BnSRS16	GT1-motif	GGTTAA	945	light responsive
		BnSRS17	GT1-motif	GGTTAA	1219	light responsive
		BnSRS18	GT1-motif	GGTTAA	68	light responsive
		BnSRS18	GT1-motif	GGTTAA	568	light responsive
		BnSRS19	GT1-motif	GGTTAA	1351	light responsive
		BnSRS20	GT1-motif	GGTTAA	1429	light responsive
		BnSRS21	GT1-motif	GGTTAA	1749	light responsive
		BnSRS22	GT1-motif	GGTTAA	944	light responsive
		BnSRS25	GT1-motif	GGTTAA	162	light responsive
		BnSRS26	GT1-motif	GGTTAA	231	light responsive
		BnSRS26	GT1-motif	GGTTAA	247	light responsive
		BnSRS29	GT1-motif	GGTTAA	717	light responsive
		BnSRS3	GT1-motif	GGTTAA	556	light responsive
		BnSRS30	GT1-motif	GGTTAA	1277	light responsive
		BnSRS30	GT1-motif	GGTTAA	1593	light responsive
		BnSRS31	GT1-motif	GGTTAA	621	light responsive
		BnSRS33	GT1-motif	GGTTAA	399	light responsive
		BnSRS34	GT1-motif	GGTTAA	1765	light responsive
		BnSRS34	GT1-motif	GGTTAA	2011	light responsive
		BnSRS8	GT1-motif	GGTTAA	1351	light responsive
		BnSRS9	GT1-motif	GGTTAA	266	light responsive
		BnSRS10	LTR	CCGAAA	96	low-temperature responsive
		BnSRS14	LTR	CCGAAA	920	low-temperature responsive
		BnSRS14	LTR	CCGAAA	1144	low-temperature responsive
		BnSRS15	LTR	CCGAAA	565	low-temperature responsive
		BnSRS15	LTR	CCGAAA	1310	low-temperature responsive
		BnSRS16	LTR	CCGAAA	32	low-temperature responsive
		BnSRS16	LTR	CCGAAA	1311	low-temperature responsive
		BnSRS18	LTR	CCGAAA	1667	low-temperature responsive
		BnSRS2	LTR	CCGAAA	1235	low-temperature responsive
		BnSRS21	LTR	CCGAAA	923	low-temperature responsive
		BnSRS24	LTR	CCGAAA	1428	low-temperature responsive
		BnSRS24	LTR	CCGAAA	1508	low-temperature responsive
		BnSRS26	LTR	CCGAAA	1405	low-temperature responsive
		BnSRS3	LTR	CCGAAA	1408	low-temperature responsive
		BnSRS30	LTR	CCGAAA	220	low-temperature responsive
		BnSRS30	LTR	CCGAAA	1198	low-temperature responsive
		BnSRS30	LTR	CCGAAA	1527	low-temperature responsive
		BnSRS32	LTR	CCGAAA	354	low-temperature responsive
		BnSRS33	LTR	CCGAAA	81	low-temperature responsive
		BnSRS33	LTR	CCGAAA	1437	low-temperature responsive
		BnSRS33	LTR	CCGAAA	1559	low-temperature responsive
		BnSRS5	LTR	CCGAAA	862	low-temperature responsive
		BnSRS7	LTR	CCGAAA	1233	low-temperature responsive
		BnSRS10	MBS	CAACTG	1017	drought-inducibility
		BnSRS13	MBS	CAACTG	642	drought-inducibility
		BnSRS14	MBS	CAACTG	1416	drought-inducibility
		BnSRS15	MBS	CAACTG	65	drought-inducibility
		BnSRS15	MBS	CAACTG	1476	drought-inducibility
		BnSRS16	MBS	CAACTG	118	drought-inducibility
		BnSRS16	MBS	CAACTG	1477	drought-inducibility
		BnSRS18	MBS	CAACTG	936	drought-inducibility
		BnSRS18	MBS	CAACTG	1639	drought-inducibility
		BnSRS19	MBS	CAACTG	497	drought-inducibility
		BnSRS19	MBS	CAACTG	1563	drought-inducibility
		BnSRS2	MBS	CAACTG	958	drought-inducibility
		BnSRS22	MBS	CAACTG	769	drought-inducibility
		BnSRS22	MBS	CAACTG	1701	drought-inducibility
		BnSRS23	MBS	CAACTG	106	drought-inducibility
		BnSRS23	MBS	CAACTG	457	drought-inducibility
		BnSRS23	MBS	CAACTG	808	drought-inducibility
		BnSRS23	MBS	CAACTG	1475	drought-inducibility
		BnSRS25	MBS	CAACTG	111	drought-inducibility
		BnSRS26	MBS	CAACTG	414	drought-inducibility
		BnSRS26	MBS	CAACTG	1575	drought-inducibility
		BnSRS27	MBS	CAACTG	223	drought-inducibility
		BnSRS29	MBS	CAACTG	1053	drought-inducibility
		BnSRS29	MBS	CAACTG	1792	drought-inducibility
		BnSRS3	MBS	CAACTG	1560	drought-inducibility
		BnSRS3	MBS	CAACTG	1712	drought-inducibility
		BnSRS31	MBS	CAACTG	1443	drought-inducibility
		BnSRS4	MBS	CAACTG	837	drought-inducibility
		BnSRS8	MBS	CAACTG	497	drought-inducibility
		BnSRS8	MBS	CAACTG	1563	drought-inducibility
		BnSRS10	MBSI	aaaAaaC(G/C)GTTA	206	flavonoid biosynthetic genes regulation
		BnSRS10	MBSI	aaaAaaC(G/C)GTTA	567	flavonoid biosynthetic genes regulation
		BnSRS10	MBSI	TTTTTACGGTTA	1635	flavonoid biosynthetic genes regulation
		BnSRS20	MBSI	aaaAaaC(G/C)GTTA	552	flavonoid biosynthetic genes regulation
		BnSRS22	MBSI	TTTTTACGGTTA	1586	flavonoid biosynthetic genes regulation
		BnSRS23	MBSI	aaaAaaC(G/C)GTTA	1152	flavonoid biosynthetic genes regulation
		BnSRS34	MBSI	aaaAaaC(G/C)GTTA	1488	flavonoid biosynthetic genes regulation
		BnSRS4	MBSI	aaaAaaC(G/C)GTTA	590	flavonoid biosynthetic genes regulation
		BnSRS12	MRE	AACCTAA	1529	light responsive
		BnSRS2	MRE	AACCTAA	871	light responsive
		BnSRS21	MRE	AACCTAA	406	light responsive
		BnSRS27	MRE	AACCTAA	260	light responsive
		BnSRS28	MRE	AACCTAA	1587	light responsive
		BnSRS28	MRE	AACCTAA	1939	light responsive
		BnSRS33	MRE	AACCTAA	46	light responsive
		BnSRS33	MRE	AACCTAA	358	light responsive
		BnSRS34	MRE	AACCTAA	332	light responsive
		BnSRS34	MRE	AACCTAA	707	light responsive
		BnSRS4	MRE	AACCTAA	915	light responsive
		BnSRS5	MRE	AACCTAA	353	light responsive
		BnSRS6	MRE	AACCTAA	112	light responsive
		BnSRS11	MSA-like	(T/C)C(T/C)AACGG(T/C)(T/C)A	1452	cell cycle regulation
		BnSRS13	MSA-like	(T/C)C(T/C)AACGG(T/C)(T/C)A	197	cell cycle regulation
		BnSRS13	MSA-like	(T/C)C(T/C)AACGG(T/C)(T/C)A	1032	cell cycle regulation
		BnSRS29	MSA-like	(T/C)C(T/C)AACGG(T/C)(T/C)A	1275	cell cycle regulation
		BnSRS1	O2-site	GTTGACGTGA	91	zein metabolism regulation
		BnSRS1	O2-site	GTTGACGTGA	1805	zein metabolism regulation
		BnSRS1	O2-site	GATGACATGG	1940	zein metabolism regulation
		BnSRS12	O2-site	GATGA(C/T)(A/G)TG(A/G)	1876	zein metabolism regulation
		BnSRS13	O2-site	GATGA(C/T)(A/G)TG(A/G)	98	zein metabolism regulation
		BnSRS13	O2-site	GATGA(C/T)(A/G)TG(A/G)	933	zein metabolism regulation
		BnSRS17	O2-site	GATGATGTGG	604	zein metabolism regulation
		BnSRS17	O2-site	GTTGACGTGA	1806	zein metabolism regulation
		BnSRS18	O2-site	GTTGACGTGA	899	zein metabolism regulation
		BnSRS20	O2-site	GATGATGTGG	1910	zein metabolism regulation
		BnSRS21	O2-site	GATGACATGG	83	zein metabolism regulation
		BnSRS25	O2-site	GATGATGTGG	171	zein metabolism regulation
		BnSRS25	O2-site	GATGACATGG	295	zein metabolism regulation
		BnSRS25	O2-site	GATGA(C/T)(A/G)TG(A/G)	1040	zein metabolism regulation
		BnSRS29	O2-site	GATGATGTGG	875	zein metabolism regulation
		BnSRS3	O2-site	GATGATGTGG	1910	zein metabolism regulation
		BnSRS30	O2-site	GTTGACGTGA	821	zein metabolism regulation
		BnSRS30	O2-site	GATGA(C/T)(A/G)TG(A/G)	1031	zein metabolism regulation
		BnSRS32	O2-site	GATGATGTGG	165	zein metabolism regulation
		BnSRS33	O2-site	GATGA(C/T)(A/G)TG(A/G)	632	zein metabolism regulation
		BnSRS34	O2-site	GTTGACGTGA	315	zein metabolism regulation
		BnSRS5	O2-site	GATGACATGG	23	zein metabolism regulation
		BnSRS27	RY-element	CATGCATG	80	seed-specific regulation
		BnSRS5	RY-element	CATGCATG	910	seed-specific regulation
		BnSRS14	Sp1	GGGCGG	1840	light responsive
		BnSRS2	Sp1	GGGCGG	130	light responsive
		BnSRS26	Sp1	GGGCGG	1357	light responsive
		BnSRS31	Sp1	GGGCGG	1840	light responsive
		BnSRS6	Sp1	GGGCGG	1118	light responsive
		BnSRS21	TATC-box	TATCCCA	1635	gibberellin responsive
		BnSRS5	TATC-box	TATCCCA	1617	gibberellin responsive
		BnSRS11	TCA-element	CCATCTTTTT	1552	salicylic acid responsive
		BnSRS14	TCA-element	CCATCTTTTT	1005	salicylic acid responsive
		BnSRS2	TCA-element	CCATCTTTTT	261	salicylic acid responsive
		BnSRS22	TCA-element	CCATCTTTTT	87	salicylic acid responsive
		BnSRS26	TCA-element	CCATCTTTTT	1897	salicylic acid responsive
		BnSRS27	TCA-element	CCATCTTTTT	880	salicylic acid responsive
		BnSRS29	TCA-element	CCATCTTTTT	617	salicylic acid responsive
		BnSRS29	TCA-element	CCATCTTTTT	893	salicylic acid responsive
		BnSRS32	TCA-element	CCATCTTTTT	576	salicylic acid responsive
		BnSRS6	TCA-element	CCATCTTTTT	708	salicylic acid responsive
		BnSRS9	TCA-element	CCATCTTTTT	45	salicylic acid responsive
		BnSRS9	TCA-element	CCATCTTTTT	242	salicylic acid responsive
		BnSRS1	TCA-element	TCAGAAGAGG	1200	salicylic acid responsive
		BnSRS1	TCA-element	TCAGAAGAGG	1548	salicylic acid responsive
		BnSRS13	TCA-element	TCAGAAGAGG	1956	salicylic acid responsive
		BnSRS15	TCA-element	TCAGAAGAGG	1060	salicylic acid responsive
		BnSRS17	TCA-element	TCAGAAGAGG	1576	salicylic acid responsive
		BnSRS27	TCA-element	TCAGAAGAGG	1648	salicylic acid responsive
		BnSRS9	TCA-element	TCAGAAGAGG	1709	salicylic acid responsive
		BnSRS1	TC-rich repeats	GTTTTCTTAC	65	stress responsive
		BnSRS17	TC-rich repeats	GTTTTCTTAC	117	stress responsive
		BnSRS17	TC-rich repeats	GTTTTCTTAC	1554	stress responsive
		BnSRS18	TC-rich repeats	ATTCTCTAAC	1035	stress responsive
		BnSRS18	TC-rich repeats	ATTCTCTAAC	1333	stress responsive
		BnSRS20	TC-rich repeats	GTTTTCTTAC	37	stress responsive
		BnSRS21	TC-rich repeats	ATTCTCTAAC	1380	stress responsive
		BnSRS25	TC-rich repeats	ATTCTCTAAC	809	stress responsive
		BnSRS26	TC-rich repeats	ATTCTCTAAC	921	stress responsive
		BnSRS31	TC-rich repeats	GTTTTCTTAC	148	stress responsive
		BnSRS33	TC-rich repeats	GTTTTCTTAC	1166	stress responsive
		BnSRS34	TC-rich repeats	GTTTTCTTAC	1276	stress responsive
		BnSRS6	TC-rich repeats	ATTCTCTAAC	499	stress responsive
		BnSRS6	TC-rich repeats	GTTTTCTTAC	1068	stress responsive
		BnSRS9	TC-rich repeats	ATTCTCTAAC	749	stress responsive
		BnSRS10	TGACG-motif	TGACG	1322	MeJA-responsive
		BnSRS10	TGACG-motif	TGACG	1347	MeJA-responsive
		BnSRS13	TGACG-motif	TGACG	221	MeJA-responsive
		BnSRS13	TGACG-motif	TGACG	1056	MeJA-responsive
		BnSRS13	TGACG-motif	TGACG	1610	MeJA-responsive
		BnSRS14	TGACG-motif	TGACG	1128	MeJA-responsive
		BnSRS15	TGACG-motif	TGACG	985	MeJA-responsive
		BnSRS15	TGACG-motif	TGACG	1009	MeJA-responsive
		BnSRS16	TGACG-motif	TGACG	317	MeJA-responsive
		BnSRS16	TGACG-motif	TGACG	402	MeJA-responsive
		BnSRS17	TGACG-motif	TGACG	553	MeJA-responsive
		BnSRS18	TGACG-motif	TGACG	128	MeJA-responsive
		BnSRS18	TGACG-motif	TGACG	825	MeJA-responsive
		BnSRS19	TGACG-motif	TGACG	1826	MeJA-responsive
		BnSRS2	TGACG-motif	TGACG	1193	MeJA-responsive
		BnSRS20	TGACG-motif	TGACG	257	MeJA-responsive
		BnSRS20	TGACG-motif	TGACG	313	MeJA-responsive
		BnSRS20	TGACG-motif	TGACG	337	MeJA-responsive
		BnSRS21	TGACG-motif	TGACG	50	MeJA-responsive
		BnSRS22	TGACG-motif	TGACG	969	MeJA-responsive
		BnSRS22	TGACG-motif	TGACG	994	MeJA-responsive
		BnSRS22	TGACG-motif	TGACG	1518	MeJA-responsive
		BnSRS22	TGACG-motif	TGACG	1856	MeJA-responsive
		BnSRS23	TGACG-motif	TGACG	250	MeJA-responsive
		BnSRS23	TGACG-motif	TGACG	601	MeJA-responsive
		BnSRS23	TGACG-motif	TGACG	952	MeJA-responsive
		BnSRS24	TGACG-motif	TGACG	382	MeJA-responsive
		BnSRS24	TGACG-motif	TGACG	765	MeJA-responsive
		BnSRS24	TGACG-motif	TGACG	1136	MeJA-responsive
		BnSRS24	TGACG-motif	TGACG	1826	MeJA-responsive
		BnSRS25	TGACG-motif	TGACG	1236	MeJA-responsive
		BnSRS25	TGACG-motif	TGACG	1259	MeJA-responsive
		BnSRS26	TGACG-motif	TGACG	1468	MeJA-responsive
		BnSRS26	TGACG-motif	TGACG	1792	MeJA-responsive
		BnSRS27	TGACG-motif	TGACG	409	MeJA-responsive
		BnSRS29	TGACG-motif	TGACG	454	MeJA-responsive
		BnSRS29	TGACG-motif	TGACG	624	MeJA-responsive
		BnSRS29	TGACG-motif	TGACG	1299	MeJA-responsive
		BnSRS29	TGACG-motif	TGACG	1613	MeJA-responsive
		BnSRS3	TGACG-motif	TGACG	274	MeJA-responsive
		BnSRS30	TGACG-motif	TGACG	189	MeJA-responsive
		BnSRS30	TGACG-motif	TGACG	451	MeJA-responsive
		BnSRS30	TGACG-motif	TGACG	637	MeJA-responsive
		BnSRS30	TGACG-motif	TGACG	823	MeJA-responsive
		BnSRS31	TGACG-motif	TGACG	1158	MeJA-responsive
		BnSRS32	TGACG-motif	TGACG	224	MeJA-responsive
		BnSRS34	TGACG-motif	TGACG	317	MeJA-responsive
		BnSRS34	TGACG-motif	TGACG	320	MeJA-responsive
		BnSRS34	TGACG-motif	TGACG	358	MeJA-responsive
		BnSRS34	TGACG-motif	TGACG	585	MeJA-responsive
		BnSRS4	TGACG-motif	TGACG	1240	MeJA-responsive
		BnSRS7	TGACG-motif	TGACG	249	MeJA-responsive
		BnSRS7	TGACG-motif	TGACG	276	MeJA-responsive
		BnSRS7	TGACG-motif	TGACG	296	MeJA-responsive
		BnSRS7	TGACG-motif	TGACG	400	MeJA-responsive
		BnSRS8	TGACG-motif	TGACG	1826	MeJA-responsive
		BnSRS1	TGA-element	AACGAC	62	auxin-responsive
		BnSRS10	TGA-element	AACGAC	1702	auxin-responsive
		BnSRS11	TGA-element	AACGAC	1406	auxin-responsive
		BnSRS14	TGA-element	AACGAC	1787	auxin-responsive
		BnSRS15	TGA-element	AACGAC	1487	auxin-responsive
		BnSRS16	TGA-element	AACGAC	957	auxin-responsive
		BnSRS16	TGA-element	AACGAC	1488	auxin-responsive
		BnSRS19	TGA-element	AACGAC	817	auxin-responsive
		BnSRS19	TGA-element	AACGAC	1759	auxin-responsive
		BnSRS23	TGA-element	AACGAC	1486	auxin-responsive
		BnSRS28	TGA-element	AACGAC	2002	auxin-responsive
		BnSRS29	TGA-element	AACGAC	501	auxin-responsive
		BnSRS31	TGA-element	AACGAC	1787	auxin-responsive
		BnSRS34	TGA-element	AACGAC	1659	auxin-responsive
		BnSRS34	TGA-element	AACGAC	1761	auxin-responsive
		BnSRS5	TGA-element	AACGAC	447	auxin-responsive
		BnSRS8	TGA-element	AACGAC	817	auxin-responsive
		BnSRS8	TGA-element	AACGAC	1759	auxin-responsive
		BnSRS9	TGA-element	AACGAC	1047	auxin-responsive
		BnSRS13	WUN-motif	AAATTTCCT	235	auxin-responsive
		BnSRS13	WUN-motif	AAATTTCCT	1070	auxin-responsive
		BnSRS17	WUN-motif	AAATTTCCT	658	auxin-responsive
		BnSRS26	WUN-motif	AAATTTCCT	1777	auxin-responsive
		BnSRS29	WUN-motif	AAATTTCCT	1313	auxin-responsive
		BnSRS32	WUN-motif	AAATTTCCT	1049	auxin-responsive
		BnSRS32	WUN-motif	AAATTTCCT	1779	auxin-responsive
		BnSRS7	WUN-motif	AAATTTCCT	1777	auxin-responsive

## Sheet: Table S4
Table S4. Predicted protein-protein interactions of SRS Proteins in B. napus.
TPS gene ID	Interaction gene ID	Value	Type
BnaA01g01350D	BnaA03g56900D	161	other
BnaA01g01350D	BnaA05g05020D	161	other
BnaA01g01350D	BnaC03g25370D	161	other
BnaA01g01350D	BnaC04g04400D	161	other
BnaA01g01350D	BnaA06g34850D	150	other
BnaA01g01350D	BnaA06g35040D	150	other
BnaA01g01350D	BnaA07g10940D	150	other
BnaA01g01350D	BnaA08g22830D	150	other
BnaA01g01350D	BnaA09g44760D	150	other
BnaA01g01350D	BnaC05g47890D	150	other
BnaA01g01350D	BnaC07g20650D	150	other
BnaA01g01350D	BnaC07g48830D	150	other
BnaA01g01350D	BnaC08g17680D	150	other
BnaA01g01350D	BnaC08g37460D	150	other
BnaA01g01350D	BnaA03g26980D	169	other
BnaA01g01350D	BnaC03g31940D	169	other
BnaA01g01350D	BnaA03g02470D	161	other
BnaA01g01350D	BnaAnng06150D	161	other
BnaA01g01350D	BnaC02g01170D	161	other
BnaA01g01350D	BnaC03g03480D	161	other
BnaA01g01350D	BnaC09g47560D	161	other
BnaA01g01350D	BnaA08g15740D	163	other
BnaA01g01350D	BnaC03g61310D	163	other
BnaA01g01350D	BnaC07g46670D	163	other
BnaA01g01350D	BnaA07g08580D	186	other
BnaA01g01350D	BnaC07g10630D	186	other
BnaA01g01350D	BnaC07g10640D	186	other
BnaA01g01350D	BnaA04g14950D	179	other
BnaA01g01350D	BnaA09g40860D	179	other
BnaA01g01350D	BnaC08g33370D	179	other
BnaA01g01350D	BnaCnng62750D	179	other
BnaA01g01350D	BnaA04g08800D	499	other
BnaA01g01350D	BnaA07g12110D	499	other
BnaA01g01350D	BnaC02g34930D	499	other
BnaA01g01350D	BnaC04g13390D	499	other
BnaA01g01350D	BnaC04g31090D	499	other
BnaA01g01350D	BnaC07g16290D	499	other
BnaA01g01350D	BnaA03g54930D	392	other
BnaA01g01350D	BnaA10g27410D	392	other
BnaA01g01350D	BnaAnng29380D	392	other
BnaA01g01350D	BnaC02g03640D	392	other
BnaA01g01350D	BnaC03g00520D	392	other
BnaA01g01350D	BnaCnng03740D	392	other
BnaA01g01350D	BnaA05g08190D	169	other
BnaA01g01350D	BnaAnng07660D	169	other
BnaA01g01350D	BnaC04g09240D	169	other
BnaA01g01350D	BnaA10g20370D	312	inter
BnaA01g01350D	BnaC09g44400D	312	inter
BnaA01g01350D	BnaCnng70210D	312	inter
BnaA01g01350D	BnaA06g09420D	163	other
BnaA01g01350D	BnaA09g56920D	163	other
BnaA01g01350D	BnaC01g12550D	163	other
BnaA01g01350D	BnaC05g10810D	163	other
BnaA01g01350D	BnaC08g39470D	163	other
BnaA01g01350D	BnaA05g16290D	241	other
BnaA01g01350D	BnaA09g24470D	241	other
BnaA01g01350D	BnaAnng15020D	241	other
BnaA01g01350D	BnaAnng15030D	241	other
BnaA01g01350D	BnaC05g24390D	241	other
BnaA01g01350D	BnaC05g28850D	241	other
BnaA01g01350D	BnaC08g07790D	241	other
BnaA01g01350D	BnaA04g19890D	626	other
BnaA01g01350D	BnaA05g09790D	626	other
BnaA01g01350D	BnaCnng05140D	626	other
BnaA01g01350D	BnaC01g08030D	163	other
BnaA01g01350D	BnaC02g48720D	163	other
BnaA01g01350D	BnaCnng40110D	163	other
BnaA01g01350D	BnaA03g01100D	165	other
BnaA01g01350D	BnaA03g01110D	165	other
BnaA01g01350D	BnaAnng00840D	165	other
BnaA01g01350D	BnaC02g02860D	165	other
BnaA01g01350D	BnaC03g01470D	165	other
BnaA01g01350D	BnaC03g01480D	165	other
BnaA01g01350D	BnaAnng14510D	158	other
BnaA01g01350D	BnaAnng05180D	158	other
BnaA01g01350D	BnaC02g16630D	158	other
BnaA01g01350D	BnaC07g15920D	158	other
BnaA01g01350D	BnaCnng59210D	158	other
BnaA01g01350D	BnaCnng59220D	158	other
BnaA01g01350D	BnaA07g06590D	150	other
BnaA01g01350D	BnaC07g08130D	150	other
BnaA01g01350D	BnaA05g17900D	159	other
BnaA01g01350D	BnaC05g50420D	159	other
BnaA01g01350D	BnaC05g50430D	159	other
BnaA01g01350D	BnaCnng49700D	159	other
BnaA01g01350D	BnaA07g04200D	150	other
BnaA01g01350D	BnaC01g25910D	150	other
BnaA01g01350D	BnaA05g02660D	165	other
BnaA01g01350D	BnaC04g02500D	165	other
BnaA01g01350D	BnaA09g40850D	161	other
BnaA01g01350D	BnaC08g33360D	161	other
BnaA01g01350D	BnaA07g08060D	167	other
BnaA01g01350D	BnaCnng32330D	167	other
BnaA01g01350D	BnaA09g04110D	161	other
BnaA01g01350D	BnaC09g03490D	161	other
BnaA01g01350D	BnaA06g08330D	200	other
BnaA01g01350D	BnaA09g47340D	200	other
BnaA01g01350D	BnaAnng39990D	200	other
BnaA01g01350D	BnaC08g41500D	200	other
BnaA01g01350D	BnaAnng26720D	161	other
BnaA01g01350D	BnaC02g19450D	161	other
BnaA01g01350D	BnaC02g19460D	161	other
BnaA01g01350D	BnaC06g27940D	161	other
BnaA01g01350D	BnaA03g17150D	433	other
BnaA01g01350D	BnaA03g32020D	433	other
BnaA01g01350D	BnaA04g21290D	433	other
BnaA01g01350D	BnaA04g29230D	433	other
BnaA01g01350D	BnaA05g07210D	433	other
BnaA01g01350D	BnaA05g27160D	433	other
BnaA01g01350D	BnaA05g27190D	433	other
BnaA01g01350D	BnaAnng09380D	433	other
BnaA01g01350D	BnaC03g20660D	433	other
BnaA01g01350D	BnaC03g73560D	433	other
BnaA01g01350D	BnaC04g08010D	433	other
BnaA01g01350D	BnaC05g41290D	433	other
BnaA01g01350D	BnaA07g04820D	165	other
BnaA01g01350D	BnaCnng00400D	165	other
BnaA01g01350D	BnaA05g13750D	216	other
BnaA01g01350D	BnaC06g10950D	216	other
BnaA01g01350D	BnaC06g41580D	216	other
BnaA01g01350D	BnaA01g22450D	392	other
BnaA01g01350D	BnaA02g05140D	392	other
BnaA01g01350D	BnaA02g14920D	392	other
BnaA01g01350D	BnaA10g14620D	392	other
BnaA01g01350D	BnaC09g36930D	392	other
BnaA01g01350D	BnaA03g36950D	215	other
BnaA01g01350D	BnaA05g16680D	215	other
BnaA01g01350D	BnaC01g43640D	215	other
BnaA01g01350D	BnaC05g29300D	215	other
BnaA01g01350D	BnaC07g16810D	215	other
BnaA01g01350D	BnaA07g12710D	261	inter
BnaA01g01350D	BnaC07g16800D	261	inter
BnaA01g01350D	BnaA07g12160D	554	other
BnaA01g01350D	BnaA09g07590D	554	other
BnaA01g01350D	BnaAnng19120D	554	other
BnaA01g01350D	BnaC02g16560D	554	other
BnaA01g01350D	BnaC07g16340D	554	other
BnaA01g01350D	BnaC09g07530D	554	other
BnaA01g01350D	BnaAnng05510D	165	other
BnaA01g01350D	BnaC02g14240D	165	other
BnaA01g01350D	BnaC02g31520D	165	other
BnaA01g01350D	BnaC02g31530D	165	other
BnaA01g01350D	BnaC07g18340D	165	other
BnaA01g01350D	BnaA07g36170D	169	other
BnaA01g01350D	BnaA09g52870D	169	other
BnaA01g01350D	BnaC07g03390D	169	other
BnaA01g01350D	BnaC09g09760D	169	other
BnaA01g01350D	BnaA10g28040D	150	other
BnaA01g01350D	BnaC05g04320D	150	other
BnaA01g01350D	BnaA02g17280D	168	inter
BnaA01g01350D	BnaA07g21650D	168	inter
BnaA01g01350D	BnaAnng09150D	168	inter
BnaA01g01350D	BnaAnng31570D	168	inter
BnaA01g01350D	BnaC02g24360D	168	inter
BnaA01g01350D	BnaC06g22330D	168	inter
BnaA01g01350D	BnaC06g43960D	168	inter
BnaA01g01350D	BnaA02g26520D	155	other
BnaA01g01350D	BnaA06g34090D	155	other
BnaA01g01350D	BnaC02g34700D	155	other
BnaA01g01350D	BnaC07g21810D	155	other
BnaA01g01350D	BnaA03g32210D	185	other
BnaA01g01350D	BnaA05g26750D	185	other
BnaA01g01350D	BnaC03g37500D	185	other
BnaA01g01350D	BnaC05g40770D	185	other
BnaA01g01350D	BnaCnng22920D	185	other
BnaA01g01350D	BnaAnng03900D	327	other
BnaA01g01350D	BnaC08g48680D	327	other
BnaA01g01350D	BnaA01g34820D	351	other
BnaA01g01350D	BnaA01g34830D	351	other
BnaA01g01350D	BnaA08g30700D	351	other
BnaA01g01350D	BnaC01g06840D	351	other
BnaA01g01350D	BnaC01g06860D	351	other
BnaA01g01350D	BnaC03g77300D	351	other
BnaA01g01350D	BnaA08g03600D	165	other
BnaA01g01350D	BnaA08g03610D	165	other
BnaA01g01350D	BnaC06g01460D	165	other
BnaA01g01350D	BnaC06g01470D	165	other
BnaA01g01350D	BnaC08g04100D	165	other
BnaA01g01350D	BnaA06g17280D	161	other
BnaA01g01350D	BnaC03g57070D	161	other
BnaA01g01350D	BnaA02g17300D	165	other
BnaA01g01350D	BnaA07g21620D	165	other
BnaA01g01350D	BnaAnng09090D	165	other
BnaA01g01350D	BnaC02g23710D	165	other
BnaA01g01350D	BnaC06g22290D	165	other
BnaA01g01350D	BnaC06g36290D	165	other
BnaA01g01350D	BnaA04g27100D	521	other
BnaA01g01350D	BnaA05g01200D	521	other
BnaA01g01350D	BnaC04g00760D	521	other
BnaA01g01350D	BnaC04g50960D	521	other
BnaA01g01350D	BnaC03g55230D	167	other
BnaA01g01350D	BnaA04g20290D	226	other
BnaA01g01350D	BnaA05g09150D	226	other
BnaA01g01350D	BnaC04g10560D	226	other
BnaA01g01350D	BnaA06g12430D	165	other
BnaA01g01350D	BnaA08g22710D	165	other
BnaA01g01350D	BnaA09g44630D	165	other
BnaA01g01350D	BnaA09g44640D	165	other
BnaA01g01350D	BnaA09g44650D	165	other
BnaA01g01350D	BnaC05g14030D	165	other
BnaA01g01350D	BnaC08g17860D	165	other
BnaA01g01350D	BnaC08g37340D	165	other
BnaA01g01350D	BnaC08g37360D	165	other
BnaA01g01350D	BnaC08g37370D	165	other
BnaA01g01350D	BnaA01g04480D	499	other
BnaA01g01350D	BnaA03g52120D	499	other
BnaA01g01350D	BnaA08g12150D	499	other
BnaA01g01350D	BnaC01g05930D	499	other
BnaA01g01350D	BnaC03g67130D	499	other
BnaA01g01350D	BnaC07g43850D	499	other
BnaA01g01350D	BnaC07g43860D	499	other
BnaA01g01350D	BnaA08g12990D	305	other
BnaA01g01350D	BnaAnng37940D	305	other
BnaA01g01350D	BnaC07g42760D	305	other
BnaA01g01350D	BnaC04g23610D	169	other
BnaA01g01350D	BnaA04g13690D	167	other
BnaA01g01350D	BnaAnng19610D	167	other
BnaA01g01350D	BnaC04g35960D	167	other
BnaA01g01350D	BnaC08g34440D	167	other
BnaA01g01350D	BnaA07g10550D	169	other
BnaA01g01350D	BnaC07g13810D	169	other
BnaA01g01350D	BnaA06g13970D	304	inter
BnaA01g01350D	BnaC02g22360D	304	other
BnaA01g01350D	BnaC07g05440D	304	inter
BnaA01g01350D	BnaC07g15630D	304	inter
BnaA01g01350D	BnaCnng57210D	304	inter
BnaA01g01350D	BnaC07g48230D	179	other
BnaA01g01350D	BnaAnng38590D	167	other
BnaA01g01350D	BnaC07g45740D	167	other
BnaA01g01350D	BnaA06g27100D	150	other
BnaA01g01350D	BnaA09g04800D	150	other
BnaA01g01350D	BnaC07g29850D	150	other
BnaA01g01350D	BnaA09g26050D	165	other
BnaA01g01350D	BnaC05g23470D	165	other
BnaA01g01350D	BnaA08g22190D	169	other
BnaA01g01350D	BnaC08g18630D	169	other
BnaA01g01350D	BnaA07g13430D	158	other
BnaA01g01350D	BnaC04g16450D	158	other
BnaA01g01350D	BnaA05g02790D	150	other
BnaA01g01350D	BnaA05g34300D	150	other
BnaA01g01350D	BnaA05g35340D	150	other
BnaA01g01350D	BnaA08g02440D	150	other
BnaA01g01350D	BnaA08g02690D	150	other
BnaA01g01350D	BnaA08g03950D	150	other
BnaA01g01350D	BnaC04g02350D	150	other
BnaA01g01350D	BnaC04g02670D	150	other
BnaA01g01350D	BnaC04g12990D	150	other
BnaA01g01350D	BnaC04g13010D	150	other
BnaA01g01350D	BnaC04g52680D	150	other
BnaA01g01350D	BnaC06g01210D	150	other
BnaA01g01350D	BnaC08g02640D	150	other
BnaA01g01350D	BnaC08g04610D	150	other
BnaA01g01350D	BnaC08g04950D	150	other
BnaA01g01350D	BnaC08g04970D	150	other
BnaA01g01350D	BnaC08g04980D	150	other
BnaA01g01350D	BnaCnng27530D	150	other
BnaA01g01350D	BnaA04g10680D	169	other
BnaA01g01350D	BnaC04g32990D	169	other
BnaA01g01350D	BnaA04g26570D	150	other
BnaA01g01350D	BnaA05g05250D	150	other
BnaA01g01350D	BnaA05g05280D	150	other
BnaA01g01350D	BnaC04g04660D	150	other
BnaA01g01350D	BnaC04g04680D	150	other
BnaA01g01350D	BnaC04g50600D	150	other
BnaA01g01350D	BnaA01g25650D	169	other
BnaA01g01350D	BnaC01g43750D	169	other
BnaA01g01350D	BnaA01g00610D	270	other
BnaA01g01350D	BnaA03g53900D	270	other
BnaA01g01350D	BnaC01g01600D	270	other
BnaA01g01350D	BnaC07g46460D	270	other
BnaA01g01350D	BnaA10g18280D	169	other
BnaA01g01350D	BnaA10g28110D	169	other
BnaA01g01350D	BnaC09g41800D	169	other
BnaA01g01350D	BnaA03g27180D	465	other
BnaA01g01350D	BnaC03g32180D	465	other
BnaA01g01350D	BnaA09g34710D	211	other
BnaA01g01350D	BnaC08g25670D	211	other
BnaA01g01350D	BnaA09g17720D	169	other
BnaA01g01350D	BnaC09g18680D	169	other
BnaA01g01350D	BnaA01g03220D	306	other
BnaA01g01350D	BnaA03g38640D	306	other
BnaA01g01350D	BnaA03g50630D	306	other
BnaA01g01350D	BnaAnng34680D	306	other
BnaA01g01350D	BnaC01g04480D	306	other
BnaA01g01350D	BnaC03g66400D	306	other
BnaA01g01350D	BnaC07g44490D	306	other
BnaA01g01350D	BnaCnng47190D	306	other
BnaA01g01350D	BnaA04g05740D	167	other
BnaA01g01350D	BnaA09g32570D	167	other
BnaA01g01350D	BnaC08g23440D	167	other
BnaA01g01350D	BnaCnng36630D	167	other
BnaA01g01350D	BnaA05g16310D	317	other
BnaA01g01350D	BnaA06g07380D	317	other
BnaA01g01350D	BnaA08g24290D	317	other
BnaA01g01350D	BnaC08g15880D	317	other
BnaA01g01350D	BnaA03g54320D	302	other
BnaA01g01350D	BnaC07g46780D	302	other
BnaA01g01350D	BnaA04g17430D	165	other
BnaA01g01350D	BnaA05g12120D	165	other
BnaA01g01350D	BnaC04g14480D	165	other
BnaA01g01350D	BnaC04g41060D	165	other
BnaA01g01350D	BnaA03g27750D	161	other
BnaA01g01350D	BnaAnng16870D	161	other
BnaA01g01350D	BnaC03g32790D	161	other
BnaA01g01350D	BnaC05g48480D	161	other
BnaA01g01350D	BnaA03g21110D	153	other
BnaA01g01350D	BnaA07g38010D	153	other
BnaA01g01350D	BnaAnng40070D	153	other
BnaA01g01350D	BnaC03g25170D	153	other
BnaA01g01350D	BnaC04g50150D	153	other
BnaA01g01350D	BnaC06g16230D	153	other
BnaA01g01350D	BnaA07g13460D	169	other
BnaA01g01350D	BnaC04g16410D	169	other
BnaA01g01350D	BnaA04g23330D	167	other
BnaA01g01350D	BnaC04g01430D	167	other
BnaA01g01350D	BnaC04g47240D	167	other
BnaA01g01350D	BnaA01g21210D	620	other
BnaA01g01350D	BnaAnng03680D	620	other
BnaA01g01350D	BnaC01g26610D	620	other
BnaA01g01350D	BnaC08g21730D	620	other
BnaA01g01350D	BnaA07g36970D	612	other
BnaA01g01350D	BnaA08g19660D	612	other
BnaA01g01350D	BnaC07g12200D	612	other
BnaA01g01350D	BnaCnng04500D	612	other
BnaA01g01350D	BnaA10g18340D	392	other
BnaA01g01350D	BnaC09g41880D	392	other
BnaA01g01350D	BnaA01g16650D	307	other
BnaA01g01350D	BnaA03g48800D	307	other
BnaA01g01350D	BnaA09g29580D	307	other
BnaA01g01350D	BnaC01g20430D	307	other
BnaA01g01350D	BnaC07g40960D	307	other
BnaA01g01350D	BnaA06g30470D	216	other
BnaA01g01350D	BnaAnng08020D	216	other
BnaA01g01350D	BnaC02g38330D	216	other
BnaA01g01350D	BnaC07g49210D	216	other
BnaA01g01350D	BnaA03g39820D	152	other
BnaA01g01350D	BnaA09g05500D	152	other
BnaA01g01350D	BnaAnng06660D	152	other
BnaA01g01350D	BnaC02g41870D	152	other
BnaA01g01350D	BnaC07g49790D	152	other
BnaA01g01350D	BnaCnng52780D	152	other
BnaA01g01350D	BnaCnng52790D	152	other
BnaA01g01350D	BnaA04g12150D	230	inter
BnaA01g01350D	BnaA09g43210D	230	inter
BnaA01g01350D	BnaC08g35730D	230	inter
BnaA01g01350D	BnaA04g04120D	250	inter
BnaA01g01350D	BnaA09g34300D	250	inter
BnaA01g01350D	BnaC04g26320D	250	inter
BnaA01g01350D	BnaC08g25250D	250	inter
BnaA01g01350D	BnaA10g26560D	211	other
BnaA01g01350D	BnaCnng02800D	211	other
BnaA01g01350D	BnaA03g40730D	163	other
BnaA01g01350D	BnaC07g31660D	163	other
BnaA01g01350D	BnaA02g03130D	251	other
BnaA01g01350D	BnaA03g06110D	251	other
BnaA01g01350D	BnaA10g17920D	251	other
BnaA01g01350D	BnaC02g06680D	251	other
BnaA01g01350D	BnaC03g07850D	251	other
BnaA01g01350D	BnaC09g32160D	251	other
BnaA01g01350D	BnaCnng54120D	251	other
BnaA01g01350D	BnaC01g11330D	165	other
BnaA01g01350D	BnaA01g26700D	161	other
BnaA01g01350D	BnaA03g34820D	161	other
BnaA01g01350D	BnaC01g34090D	161	other
BnaA01g01350D	BnaC05g51920D	161	other
BnaA01g01350D	BnaCnng23770D	161	other
BnaA01g01350D	BnaA02g00140D	568	other
BnaA01g01350D	BnaC09g46950D	568	other
BnaA01g01350D	BnaCnng45350D	568	other
BnaA01g01350D	BnaA07g34520D	343	other
BnaA01g01350D	BnaAnng33110D	343	other
BnaA01g01350D	BnaC06g39360D	343	other
BnaA01g01350D	BnaCnng66370D	343	other
BnaA01g01350D	BnaA08g25210D	402	other
BnaA01g01350D	BnaA08g25220D	402	other
BnaA01g01350D	BnaA09g09540D	402	other
BnaA01g01350D	BnaA09g09550D	402	other
BnaA01g01350D	BnaAnng41580D	402	other
BnaA01g01350D	BnaC02g41270D	402	other
BnaA01g01350D	BnaC08g15000D	402	other
BnaA01g01350D	BnaC08g15020D	402	other
BnaA01g01350D	BnaCnng69010D	402	other
BnaA01g01350D	BnaCnng18030D	402	other
BnaA01g01350D	BnaA03g18780D	155	other
BnaA01g01350D	BnaA05g05750D	155	other
BnaA01g01350D	BnaC03g72630D	155	other
BnaA01g01350D	BnaC04g05580D	155	other
BnaA01g01350D	BnaA03g06870D	169	other
BnaA01g01350D	BnaA10g16760D	169	other
BnaA01g01350D	BnaC03g08770D	169	other
BnaA01g01350D	BnaC09g39780D	169	other
BnaA01g01350D	BnaA04g05090D	410	other
BnaA01g01350D	BnaCnng32860D	410	other
BnaA01g01350D	BnaCnng59890D	410	other
BnaA01g01350D	BnaA10g29150D	215	other
BnaA01g01350D	BnaA10g29160D	215	other
BnaA01g01350D	BnaAnng17290D	215	other
BnaA01g01350D	BnaC03g12330D	215	other
BnaA01g01350D	BnaC09g34120D	215	other
BnaA01g01350D	BnaA03g08730D	169	other
BnaA01g01350D	BnaA10g13650D	169	other
BnaA01g01350D	BnaC03g11060D	169	other
BnaA01g01350D	BnaC09g36130D	169	other
BnaA01g01350D	BnaA01g02480D	433	other
BnaA01g01350D	BnaA03g52990D	433	other
BnaA01g01350D	BnaA08g11030D	433	other
BnaA01g01350D	BnaC01g03740D	433	other
BnaA01g01350D	BnaC07g45180D	433	other
BnaA01g01350D	BnaCnng63480D	433	other
BnaA01g01350D	BnaA04g07050D	165	other
BnaA01g01350D	BnaCnng14690D	165	other
BnaA01g01350D	BnaA01g07220D	499	other
BnaA01g01350D	BnaA03g49640D	499	other
BnaA01g01350D	BnaAnng21470D	499	other
BnaA01g01350D	BnaC01g08790D	499	other
BnaA01g01350D	BnaC02g47630D	499	other
BnaA01g01350D	BnaC07g50830D	499	other
BnaA01g01350D	BnaCnng33720D	499	other
BnaA01g01350D	BnaA01g00730D	700	other
BnaA01g01350D	BnaA08g15580D	700	other
BnaA01g01350D	BnaC01g01720D	700	other
BnaA01g01350D	BnaC03g61610D	700	other
BnaA01g01350D	BnaA01g04490D	450	other
BnaA01g01350D	BnaA08g12160D	450	other
BnaA01g01350D	BnaC01g05950D	450	other
BnaA01g01350D	BnaC03g67260D	450	other
BnaA01g01350D	BnaCnng74730D	450	other
BnaA01g01350D	BnaA10g26730D	222	other
BnaA01g01350D	BnaAnng18440D	222	other
BnaA01g01350D	BnaC02g03290D	222	other
BnaA01g01350D	BnaCnng03010D	222	other
BnaA01g01350D	BnaAnng19940D	155	other
BnaA01g01350D	BnaC09g33190D	155	other
BnaA01g01350D	BnaA10g19980D	169	other
BnaA01g01350D	BnaC01g04150D	169	other
BnaA01g01350D	BnaC01g37670D	169	other
BnaA01g01350D	BnaC07g15460D	169	other
BnaA01g01350D	BnaC08g26670D	169	other
BnaA01g01350D	BnaC09g06180D	169	other
BnaA01g01350D	BnaC09g07860D	169	other
BnaA01g01350D	BnaC09g07870D	169	other
BnaA01g01350D	BnaC09g30840D	169	other
BnaA01g01350D	BnaC09g43760D	169	other
BnaA01g01350D	BnaA07g00100D	169	other
BnaA01g01350D	BnaCnng48860D	169	other
BnaA01g01350D	BnaA02g33830D	169	other
BnaA01g01350D	BnaA06g22790D	169	other
BnaA01g01350D	BnaC02g42610D	169	other
BnaA01g01350D	BnaC03g50710D	169	other
BnaA01g01350D	BnaC09g06030D	169	other
BnaA01g01350D	BnaA02g21320D	240	other
BnaA01g01350D	BnaA03g25090D	240	other
BnaA01g01350D	BnaA09g20970D	240	other
BnaA01g01350D	BnaC02g46720D	240	other
BnaA01g01350D	BnaC03g29520D	240	other
BnaA01g01350D	BnaCnng22170D	240	other
BnaA01g01350D	BnaA02g00930D	667	other
BnaA01g01350D	BnaAnng37780D	667	other
BnaA01g01350D	BnaC09g45330D	667	other
BnaA01g01350D	BnaCnng19720D	667	other
BnaA01g01350D	BnaA05g02890D	169	other
BnaA01g01350D	BnaC04g52720D	169	other
BnaA01g01350D	BnaA09g30380D	155	other
BnaA01g01350D	BnaC05g18030D	155	other
BnaA01g01350D	BnaA05g11640D	161	other
BnaA01g01350D	BnaA05g11650D	161	other
BnaA01g01350D	BnaC04g13290D	161	other
BnaA01g01350D	BnaA02g13870D	459	other
BnaA01g01350D	BnaA07g27150D	459	other
BnaA01g01350D	BnaC02g18270D	459	other
BnaA01g01350D	BnaC06g30050D	459	other
BnaA01g01350D	BnaA04g02270D	560	other
BnaA01g01350D	BnaA07g17440D	560	other
BnaA01g01350D	BnaA09g36970D	560	other
BnaA01g01350D	BnaC06g42710D	560	other
BnaA01g01350D	BnaC08g28680D	560	other
BnaA01g01350D	BnaA04g06660D	169	other
BnaA01g01350D	BnaC04g55780D	169	other
BnaA01g01350D	BnaA01g00340D	167	other
BnaA01g01350D	BnaA03g54190D	167	other
BnaA01g01350D	BnaC01g01340D	167	other
BnaA01g01350D	BnaC07g46690D	167	other
BnaA01g01350D	BnaA01g29050D	161	other
BnaA01g01350D	BnaA03g33680D	161	other
BnaA01g01350D	BnaA05g24520D	161	other
BnaA01g01350D	BnaC01g36430D	161	other
BnaA01g01350D	BnaC03g38850D	161	other
BnaA01g01350D	BnaCnng59700D	161	other
BnaA01g01350D	BnaA02g06450D	353	other
BnaA01g01350D	BnaA03g09020D	353	other
BnaA01g01350D	BnaA10g13070D	353	other
BnaA01g01350D	BnaA10g13090D	353	other
BnaA01g01350D	BnaA10g13100D	353	other
BnaA01g01350D	BnaC03g11250D	353	other
BnaA01g01350D	BnaC09g35550D	353	other
BnaA01g01350D	BnaC09g35560D	353	other
BnaA01g01350D	BnaC09g35580D	353	other
BnaA01g01350D	BnaC09g35590D	353	other
BnaA01g01350D	BnaC09g35610D	353	other
BnaA01g01350D	BnaC09g35910D	353	other
BnaA01g01350D	BnaAnng18520D	271	other
BnaA01g01350D	BnaAnng18530D	271	other
BnaA01g01350D	BnaA05g17550D	264	other
BnaA01g01350D	BnaA05g17560D	264	other
BnaA01g01350D	BnaAnng04570D	264	other
BnaA01g01350D	BnaC05g27600D	264	other
BnaA01g01350D	BnaC05g27620D	264	other
BnaA01g01350D	BnaCnng46390D	264	other
BnaA01g01350D	BnaA10g00810D	309	other
BnaA01g01350D	BnaAnng17880D	309	other
BnaA01g01350D	BnaC03g71370D	309	other
BnaA01g01350D	BnaC05g00870D	309	other
BnaA01g01350D	BnaA07g27740D	555	other
BnaA01g01350D	BnaCnng61410D	555	other
BnaA01g01350D	BnaA03g27200D	319	other
BnaA01g01350D	BnaC03g32200D	319	other
BnaA01g01350D	BnaA02g09980D	150	other
BnaA01g01350D	BnaAnng41790D	150	other
BnaA01g01350D	BnaC04g35120D	150	other
BnaA01g01350D	BnaC09g30290D	150	other
BnaA01g01350D	BnaA05g20080D	169	other
BnaA01g01350D	BnaC05g31440D	169	other
BnaA01g01350D	BnaA04g24890D	150	other
BnaA01g01350D	BnaC04g48720D	150	other
BnaA01g01350D	BnaA10g09090D	234	other
BnaA01g01350D	BnaC09g31260D	234	other
BnaA01g01350D	BnaA05g06960D	203	other
BnaA01g01350D	BnaCnng67410D	203	other
BnaA01g01350D	BnaA01g16120D	234	other
BnaA01g01350D	BnaA03g48400D	234	other
BnaA01g01350D	BnaC04g52200D	234	other
BnaA01g01350D	BnaC07g02570D	234	other
BnaA01g01350D	BnaC07g40410D	234	other
BnaA01g01350D	BnaCnng28880D	234	other
BnaA01g01350D	BnaCnng29710D	234	other
BnaA01g01350D	BnaA01g13570D	169	other
BnaA01g01350D	BnaC01g15790D	169	other
BnaA01g01350D	BnaC07g38630D	169	other
BnaA01g01350D	BnaA01g36210D	165	other
BnaA01g01350D	BnaA01g36220D	165	other
BnaA01g01350D	BnaA03g60680D	165	other
BnaA01g01350D	BnaA04g06790D	165	other
BnaA01g01350D	BnaA09g13630D	165	other
BnaA01g01350D	BnaC04g18960D	165	other
BnaA01g01350D	BnaC08g08690D	165	other
BnaA01g01350D	BnaCnng38830D	165	other
BnaA01g01350D	BnaCnng57540D	165	other
BnaA01g01350D	BnaA09g08440D	214	other
BnaA01g01350D	BnaA09g13180D	214	other
BnaA01g01350D	BnaC09g08730D	214	other
BnaA01g01350D	BnaA07g01860D	185	inter
BnaA01g01350D	BnaC02g11580D	185	inter
BnaA01g01350D	BnaC07g03690D	185	inter
BnaA01g19680D	BnaA02g00810D	269	other
BnaA01g19680D	BnaA03g03190D	269	other
BnaA01g19680D	BnaC03g04580D	269	other
BnaA01g19680D	BnaCnng20070D	269	other
BnaA01g19680D	BnaA08g27480D	639	other
BnaA01g19680D	BnaC08g46280D	639	other
BnaA01g19680D	BnaA10g27610D	235	other
BnaA01g19680D	BnaCnng03900D	235	other
BnaA01g19680D	BnaA03g54930D	218	other
BnaA01g19680D	BnaA10g27410D	218	other
BnaA01g19680D	BnaAnng29380D	218	other
BnaA01g19680D	BnaC02g03640D	218	other
BnaA01g19680D	BnaC03g00520D	218	other
BnaA01g19680D	BnaCnng03740D	218	other
BnaA01g19680D	BnaA03g39870D	161	other
BnaA01g19680D	BnaAnng27820D	161	other
BnaA01g19680D	BnaC02g41900D	161	other
BnaA01g19680D	BnaC07g49840D	161	other
BnaA01g19680D	BnaA02g12260D	153	other
BnaA01g19680D	BnaA06g34810D	153	other
BnaA01g19680D	BnaA09g18700D	153	other
BnaA01g19680D	BnaC04g17250D	153	other
BnaA01g19680D	BnaC07g20900D	153	other
BnaA01g19680D	BnaC09g53060D	153	other
BnaA01g19680D	BnaC09g52270D	153	other
BnaA01g19680D	BnaA01g04940D	186	other
BnaA01g19680D	BnaA01g04960D	186	other
BnaA01g19680D	BnaA03g51810D	186	other
BnaA01g19680D	BnaA09g55820D	186	other
BnaA01g19680D	BnaC01g06510D	186	other
BnaA01g19680D	BnaC01g06530D	186	other
BnaA01g19680D	BnaC07g43570D	186	other
BnaA01g19680D	BnaC08g33530D	186	other
BnaA01g19680D	BnaA05g16290D	183	other
BnaA01g19680D	BnaA09g24470D	183	other
BnaA01g19680D	BnaAnng15020D	183	other
BnaA01g19680D	BnaAnng15030D	183	other
BnaA01g19680D	BnaC05g24390D	183	other
BnaA01g19680D	BnaC05g28850D	183	other
BnaA01g19680D	BnaC08g07790D	183	other
BnaA01g19680D	BnaA03g17600D	150	other
BnaA01g19680D	BnaA03g18790D	150	other
BnaA01g19680D	BnaA04g21830D	150	other
BnaA01g19680D	BnaA05g06540D	150	other
BnaA01g19680D	BnaAnng30780D	150	other
BnaA01g19680D	BnaC03g21070D	150	other
BnaA01g19680D	BnaC04g07210D	150	other
BnaA01g19680D	BnaC04g45700D	150	other
BnaA01g19680D	BnaA03g14580D	211	other
BnaA01g19680D	BnaA05g11240D	211	other
BnaA01g19680D	BnaC03g17600D	211	other
BnaA01g19680D	BnaCnng27540D	211	other
BnaA01g19680D	BnaA01g14030D	404	other
BnaA01g19680D	BnaC01g16530D	404	other
BnaA01g19680D	BnaA01g02640D	329	other
BnaA01g19680D	BnaA03g52870D	329	other
BnaA01g19680D	BnaA08g11150D	329	other
BnaA01g19680D	BnaC01g03880D	329	other
BnaA01g19680D	BnaC03g66050D	329	other
BnaA01g19680D	BnaC07g45060D	329	other
BnaA01g19680D	BnaA04g17860D	224	other
BnaA01g19680D	BnaA04g17870D	224	other
BnaA01g19680D	BnaC04g41480D	224	other
BnaA01g19680D	BnaA04g07950D	213	other
BnaA01g19680D	BnaA07g25390D	213	other
BnaA01g19680D	BnaC06g27170D	213	other
BnaA01g19680D	BnaCnng25410D	213	other
BnaA01g19680D	BnaA04g11060D	151	other
BnaA01g19680D	BnaCnng33960D	151	other
BnaA01g19680D	BnaA02g03860D	276	other
BnaA01g19680D	BnaC02g07720D	276	other
BnaA01g19680D	BnaC09g39750D	276	other
BnaA01g19680D	BnaCnng32580D	276	other
BnaA01g19680D	BnaA07g12160D	461	other
BnaA01g19680D	BnaA09g07590D	461	other
BnaA01g19680D	BnaAnng19120D	461	other
BnaA01g19680D	BnaC02g16560D	461	other
BnaA01g19680D	BnaC07g16340D	461	other
BnaA01g19680D	BnaC09g07530D	461	other
BnaA01g19680D	BnaA06g35910D	328	other
BnaA01g19680D	BnaA09g18200D	328	other
BnaA01g19680D	BnaA09g53560D	328	other
BnaA01g19680D	BnaC07g19480D	328	other
BnaA01g19680D	BnaC07g19500D	328	other
BnaA01g19680D	BnaC07g19530D	328	other
BnaA01g19680D	BnaC09g19710D	328	other
BnaA01g19680D	BnaC09g19730D	328	other
BnaA01g19680D	BnaAnng05510D	639	other
BnaA01g19680D	BnaC02g14240D	639	other
BnaA01g19680D	BnaC02g31520D	639	other
BnaA01g19680D	BnaC02g31530D	639	other
BnaA01g19680D	BnaC07g18340D	639	other
BnaA01g19680D	BnaA07g32120D	332	other
BnaA01g19680D	BnaC06g36500D	332	other
BnaA01g19680D	BnaA02g17280D	219	inter
BnaA01g19680D	BnaA07g21650D	219	inter
BnaA01g19680D	BnaAnng09150D	219	inter
BnaA01g19680D	BnaAnng31570D	219	inter
BnaA01g19680D	BnaC02g24360D	219	inter
BnaA01g19680D	BnaC06g22330D	219	inter
BnaA01g19680D	BnaC06g43960D	219	inter
BnaA01g19680D	BnaA01g21880D	163	other
BnaA01g19680D	BnaA07g22180D	163	other
BnaA01g19680D	BnaC01g28210D	163	other
BnaA01g19680D	BnaCnng37800D	163	other
BnaA01g19680D	BnaA02g19020D	269	other
BnaA01g19680D	BnaA06g22000D	269	other
BnaA01g19680D	BnaA07g34330D	269	other
BnaA01g19680D	BnaC02g25200D	269	other
BnaA01g19680D	BnaC03g78350D	269	other
BnaA01g19680D	BnaC06g39100D	269	other
BnaA01g19680D	BnaA04g22200D	272	other
BnaA01g19680D	BnaA05g06370D	272	other
BnaA01g19680D	BnaC04g06630D	272	other
BnaA01g19680D	BnaC04g45930D	272	other
BnaA01g19680D	BnaA03g37140D	215	other
BnaA01g19680D	BnaC03g43410D	215	other
BnaA01g19680D	BnaA04g27100D	340	other
BnaA01g19680D	BnaA05g01200D	340	other
BnaA01g19680D	BnaC04g00760D	340	other
BnaA01g19680D	BnaC04g50960D	340	other
BnaA01g19680D	BnaA06g12430D	639	other
BnaA01g19680D	BnaA08g22710D	639	other
BnaA01g19680D	BnaA09g44630D	639	other
BnaA01g19680D	BnaA09g44640D	639	other
BnaA01g19680D	BnaA09g44650D	639	other
BnaA01g19680D	BnaC05g14030D	639	other
BnaA01g19680D	BnaC08g17860D	639	other
BnaA01g19680D	BnaC08g37340D	639	other
BnaA01g19680D	BnaC08g37360D	639	other
BnaA01g19680D	BnaC08g37370D	639	other
BnaA01g19680D	BnaA01g36800D	207	other
BnaA01g19680D	BnaC05g44950D	207	other
BnaA01g19680D	BnaA01g04480D	434	other
BnaA01g19680D	BnaA03g52120D	434	other
BnaA01g19680D	BnaA08g12150D	434	other
BnaA01g19680D	BnaC01g05930D	434	other
BnaA01g19680D	BnaC03g67130D	434	other
BnaA01g19680D	BnaC07g43850D	434	other
BnaA01g19680D	BnaC07g43860D	434	other
BnaA01g19680D	BnaA04g00510D	151	other
BnaA01g19680D	BnaA09g55530D	151	other
BnaA01g19680D	BnaC08g31760D	151	other
BnaA01g19680D	BnaCnng73170D	151	other
BnaA01g19680D	BnaA06g13970D	204	inter
BnaA01g19680D	BnaC02g22360D	204	other
BnaA01g19680D	BnaC07g05440D	204	inter
BnaA01g19680D	BnaC07g15630D	204	inter
BnaA01g19680D	BnaCnng57210D	204	inter
BnaA01g19680D	BnaA01g35580D	190	other
BnaA01g19680D	BnaA09g31290D	190	other
BnaA01g19680D	BnaC01g23810D	190	other
BnaA01g19680D	BnaC05g34660D	190	other
BnaA01g19680D	BnaA09g13310D	160	other
BnaA01g19680D	BnaC09g13580D	160	other
BnaA01g19680D	BnaA07g38860D	558	other
BnaA01g19680D	BnaC06g24600D	558	other
BnaA01g19680D	BnaC06g43670D	558	other
BnaA01g19680D	BnaA02g31040D	351	other
BnaA01g19680D	BnaA06g29190D	351	other
BnaA01g19680D	BnaA09g03450D	351	other
BnaA01g19680D	BnaC02g39370D	351	other
BnaA01g19680D	BnaC09g02740D	351	other
BnaA01g19680D	BnaA03g27180D	313	other
BnaA01g19680D	BnaC03g32180D	313	other
BnaA01g19680D	BnaA06g07270D	267	other
BnaA01g19680D	BnaA08g31650D	267	other
BnaA01g19680D	BnaAnng33870D	267	other
BnaA01g19680D	BnaAnng33880D	267	other
BnaA01g19680D	BnaC01g44720D	267	other
BnaA01g19680D	BnaC08g07160D	267	other
BnaA01g19680D	BnaCnng75820D	267	other
BnaA01g19680D	BnaCnng41000D	267	other
BnaA01g19680D	BnaCnng41010D	267	other
BnaA01g19680D	BnaCnng18080D	267	other
BnaA01g19680D	BnaA01g03220D	152	other
BnaA01g19680D	BnaA03g38640D	152	other
BnaA01g19680D	BnaA03g50630D	152	other
BnaA01g19680D	BnaAnng34680D	152	other
BnaA01g19680D	BnaC01g04480D	152	other
BnaA01g19680D	BnaC03g66400D	152	other
BnaA01g19680D	BnaC07g44490D	152	other
BnaA01g19680D	BnaCnng47190D	152	other
BnaA01g19680D	BnaA08g28950D	663	other
BnaA01g19680D	BnaA09g49410D	663	other
BnaA01g19680D	BnaA10g04870D	663	other
BnaA01g19680D	BnaC08g02230D	663	other
BnaA01g19680D	BnaC08g45360D	663	other
BnaA01g19680D	BnaA02g00440D	321	other
BnaA01g19680D	BnaA03g02860D	321	other
BnaA01g19680D	BnaA10g21970D	321	other
BnaA01g19680D	BnaC02g00420D	321	other
BnaA01g19680D	BnaC03g04220D	321	other
BnaA01g19680D	BnaC09g46360D	321	other
BnaA01g19680D	BnaA03g21110D	315	other
BnaA01g19680D	BnaA07g38010D	315	other
BnaA01g19680D	BnaAnng40070D	315	other
BnaA01g19680D	BnaC03g25170D	315	other
BnaA01g19680D	BnaC04g50150D	315	other
BnaA01g19680D	BnaC06g16230D	315	other
BnaA01g19680D	BnaA06g08970D	169	other
BnaA01g19680D	BnaA08g24080D	169	other
BnaA01g19680D	BnaA09g45790D	169	other
BnaA01g19680D	BnaA09g45800D	169	other
BnaA01g19680D	BnaC05g10400D	169	other
BnaA01g19680D	BnaC08g16020D	169	other
BnaA01g19680D	BnaC08g39870D	169	other
BnaA01g19680D	BnaC08g39880D	169	other
BnaA01g19680D	BnaA01g14640D	231	other
BnaA01g19680D	BnaA03g47250D	231	other
BnaA01g19680D	BnaC01g17210D	231	other
BnaA01g19680D	BnaC07g39450D	231	other
BnaA01g19680D	BnaA03g20200D	212	other
BnaA01g19680D	BnaC03g24130D	212	other
BnaA01g19680D	BnaA01g21210D	499	other
BnaA01g19680D	BnaAnng03680D	499	other
BnaA01g19680D	BnaC01g26610D	499	other
BnaA01g19680D	BnaC08g21730D	499	other
BnaA01g19680D	BnaA01g12730D	571	other
BnaA01g19680D	BnaA09g21310D	571	other
BnaA01g19680D	BnaC01g14460D	571	other
BnaA01g19680D	BnaC09g23710D	571	other
BnaA01g19680D	BnaA02g32110D	269	other
BnaA01g19680D	BnaA06g27560D	269	other
BnaA01g19680D	BnaC02g40790D	269	other
BnaA01g19680D	BnaC07g29530D	269	other
BnaA01g19680D	BnaA04g04120D	197	inter
BnaA01g19680D	BnaA09g34300D	197	inter
BnaA01g19680D	BnaC04g26320D	197	inter
BnaA01g19680D	BnaC08g25250D	197	inter
BnaA01g19680D	BnaA02g20940D	161	other
BnaA01g19680D	BnaA09g19880D	161	other
BnaA01g19680D	BnaC09g21880D	161	other
BnaA01g19680D	BnaCnng70660D	161	other
BnaA01g19680D	BnaA02g19620D	271	other
BnaA01g19680D	BnaA09g16970D	580	other
BnaA01g19680D	BnaC09g17960D	580	other
BnaA01g19680D	BnaA02g00140D	455	other
BnaA01g19680D	BnaC09g46950D	455	other
BnaA01g19680D	BnaCnng45350D	455	other
BnaA01g19680D	BnaA09g31180D	321	other
BnaA01g19680D	BnaA09g31200D	321	other
BnaA01g19680D	BnaC05g18610D	321	other
BnaA01g19680D	BnaA01g08750D	328	other
BnaA01g19680D	BnaC01g10420D	328	other
BnaA01g19680D	BnaA04g05090D	203	other
BnaA01g19680D	BnaCnng32860D	203	other
BnaA01g19680D	BnaCnng59890D	203	other
BnaA01g19680D	BnaA07g25950D	442	other
BnaA01g19680D	BnaC06g27570D	442	other
BnaA01g19680D	BnaA01g07220D	327	other
BnaA01g19680D	BnaA03g49640D	327	other
BnaA01g19680D	BnaAnng21470D	327	other
BnaA01g19680D	BnaC01g08790D	327	other
BnaA01g19680D	BnaC02g47630D	327	other
BnaA01g19680D	BnaC07g50830D	327	other
BnaA01g19680D	BnaCnng33720D	327	other
BnaA01g19680D	BnaA07g36710D	459	other
BnaA01g19680D	BnaA08g19170D	459	other
BnaA01g19680D	BnaC07g11010D	459	other
BnaA01g19680D	BnaCnng04890D	459	other
BnaA01g19680D	BnaA01g00730D	523	other
BnaA01g19680D	BnaA08g15580D	523	other
BnaA01g19680D	BnaC01g01720D	523	other
BnaA01g19680D	BnaC03g61610D	523	other
BnaA01g19680D	BnaA03g56890D	639	other
BnaA01g19680D	BnaA04g26330D	639	other
BnaA01g19680D	BnaC03g25360D	639	other
BnaA01g19680D	BnaC04g50380D	639	other
BnaA01g19680D	BnaA03g10230D	414	other
BnaA01g19680D	BnaC03g12910D	414	other
BnaA01g19680D	BnaC09g32770D	414	other
BnaA01g19680D	BnaAnng31150D	275	other
BnaA01g19680D	BnaC08g33590D	275	other
BnaA01g19680D	BnaA05g09210D	189	other
BnaA01g19680D	BnaA08g06160D	189	other
BnaA01g19680D	BnaC04g53860D	189	other
BnaA01g19680D	BnaCnng56960D	189	other
BnaA01g19680D	BnaA02g18880D	185	other
BnaA01g19680D	BnaA02g18890D	185	other
BnaA01g19680D	BnaA07g20540D	185	other
BnaA01g19680D	BnaA07g39220D	185	other
BnaA01g19680D	BnaC03g21140D	185	other
BnaA01g19680D	BnaC06g20390D	185	other
BnaA01g19680D	BnaC06g20400D	185	other
BnaA01g19680D	BnaC06g38900D	185	other
BnaA01g19680D	BnaCnng44700D	185	other
BnaA01g19680D	BnaA01g37280D	219	other
BnaA01g19680D	BnaA02g21680D	219	other
BnaA01g19680D	BnaA09g21570D	219	other
BnaA01g19680D	BnaCnng08430D	219	other
BnaA01g19680D	BnaCnng67520D	219	other
BnaA01g19680D	BnaA01g04870D	269	other
BnaA01g19680D	BnaA03g51900D	269	other
BnaA01g19680D	BnaC01g06410D	269	other
BnaA01g19680D	BnaC07g43650D	269	other
BnaA01g19680D	BnaA05g11640D	161	other
BnaA01g19680D	BnaA05g11650D	161	other
BnaA01g19680D	BnaC04g13290D	161	other
BnaA01g19680D	BnaA01g08170D	351	other
BnaA01g19680D	BnaA08g13610D	351	other
BnaA01g19680D	BnaAnng41850D	351	other
BnaA01g19680D	BnaC01g09750D	351	other
BnaA01g19680D	BnaC08g13170D	351	other
BnaA01g19680D	BnaA01g29050D	214	other
BnaA01g19680D	BnaA03g33680D	214	other
BnaA01g19680D	BnaA05g24520D	214	other
BnaA01g19680D	BnaC01g36430D	214	other
BnaA01g19680D	BnaC03g38850D	214	other
BnaA01g19680D	BnaCnng59700D	214	other
BnaA01g19680D	BnaAnng18520D	213	other
BnaA01g19680D	BnaAnng18530D	213	other
BnaA01g19680D	BnaA05g10850D	213	other
BnaA01g19680D	BnaC04g12390D	213	other
BnaA01g19680D	BnaA10g00810D	838	other
BnaA01g19680D	BnaAnng17880D	838	other
BnaA01g19680D	BnaC03g71370D	838	other
BnaA01g19680D	BnaC05g00870D	838	other
BnaA01g19680D	BnaA07g34360D	272	other
BnaA01g19680D	BnaC03g70510D	272	other
BnaA01g19680D	BnaC06g39190D	272	other
BnaA01g19680D	BnaA01g24250D	200	other
BnaA01g19680D	BnaA05g16720D	200	other
BnaA01g19680D	BnaC01g31210D	200	other
BnaA01g19680D	BnaC05g29370D	200	other
BnaA01g19680D	BnaA02g20420D	433	other
BnaA01g19680D	BnaA03g12070D	433	other
BnaA01g19680D	BnaA09g03240D	433	other
BnaA01g19680D	BnaC03g71880D	433	other
BnaA01g19680D	BnaCnng01550D	433	other
BnaA01g19680D	BnaA03g21550D	319	other
BnaA01g19680D	BnaA04g26820D	319	other
BnaA01g19680D	BnaA05g01030D	319	other
BnaA01g19680D	BnaC03g72370D	319	other
BnaA01g19680D	BnaC04g00580D	319	other
BnaA01g19680D	BnaC04g51560D	319	other
BnaA01g19680D	BnaA09g06160D	161	other
BnaA01g19680D	BnaC09g05700D	161	other
BnaA01g19680D	BnaAnng02150D	321	other
BnaA01g19680D	BnaC06g08330D	321	other
BnaA01g19680D	BnaA04g08800D	272	other
BnaA01g19680D	BnaA07g12110D	272	other
BnaA01g19680D	BnaC02g34930D	272	other
BnaA01g19680D	BnaC04g13390D	272	other
BnaA01g19680D	BnaC04g31090D	272	other
BnaA01g19680D	BnaC07g16290D	272	other
BnaA01g19680D	BnaA09g12730D	231	other
BnaA01g19680D	BnaC04g19980D	231	other
BnaA01g19680D	BnaC09g13080D	231	other
BnaA01g19680D	BnaA08g27000D	213	other
BnaA01g19680D	BnaA08g28200D	213	other
BnaA01g19680D	BnaA09g50410D	213	other
BnaA01g19680D	BnaA10g03210D	213	other
BnaA01g19680D	BnaC05g03200D	213	other
BnaA01g19680D	BnaC05g03220D	213	other
BnaA01g19680D	BnaC08g12460D	213	other
BnaA01g19680D	BnaC08g36440D	213	other
BnaA01g19680D	BnaC08g44060D	213	other
BnaA01g19680D	BnaC08g46380D	213	other
BnaA01g19680D	BnaC09g49220D	213	other
BnaA01g19680D	BnaA06g07730D	315	other
BnaA01g19680D	BnaA09g46720D	315	other
BnaA01g19680D	BnaC05g09160D	315	other
BnaA01g19680D	BnaC08g40750D	315	other
BnaA01g19680D	BnaA10g20370D	287	inter
BnaA01g19680D	BnaC09g44400D	287	inter
BnaA01g19680D	BnaCnng70210D	287	inter
BnaA01g19680D	BnaA04g19890D	619	other
BnaA01g19680D	BnaA05g09790D	619	other
BnaA01g19680D	BnaCnng05140D	619	other
BnaA01g19680D	BnaA05g06530D	410	other
BnaA01g19680D	BnaC03g21090D	410	other
BnaA01g19680D	BnaC04g07200D	410	other
BnaA01g19680D	BnaA02g21340D	523	other
BnaA01g19680D	BnaA09g20980D	523	other
BnaA01g19680D	BnaC02g46740D	523	other
BnaA01g19680D	BnaCnng22160D	523	other
BnaA01g19680D	BnaA04g24380D	221	other
BnaA01g19680D	BnaA09g06760D	221	other
BnaA01g19680D	BnaA09g38100D	221	other
BnaA01g19680D	BnaC02g17820D	221	other
BnaA01g19680D	BnaC02g30530D	221	other
BnaA01g19680D	BnaC02g46140D	221	other
BnaA01g19680D	BnaC05g34950D	221	other
BnaA01g19680D	BnaC07g17160D	221	other
BnaA01g19680D	BnaC09g06280D	221	other
BnaA01g19680D	BnaCnng30250D	221	other
BnaA01g19680D	BnaC04g52500D	226	other
BnaA01g19680D	BnaC04g52510D	226	other
BnaA01g19680D	BnaA06g17500D	523	other
BnaA01g19680D	BnaCnng69780D	523	other
BnaA01g19680D	BnaA02g16500D	181	other
BnaA01g19680D	BnaCnng76990D	181	other
BnaA01g19680D	BnaA06g08330D	392	other
BnaA01g19680D	BnaA09g47340D	392	other
BnaA01g19680D	BnaAnng39990D	392	other
BnaA01g19680D	BnaC08g41500D	392	other
BnaA01g19680D	BnaA08g27870D	188	other
BnaA01g19680D	BnaA10g02550D	188	other
BnaA01g19680D	BnaC05g02520D	188	other
BnaA01g19680D	BnaC08g00670D	188	other
BnaA01g19680D	BnaA03g17150D	269	other
BnaA01g19680D	BnaA03g32020D	269	other
BnaA01g19680D	BnaA04g21290D	269	other
BnaA01g19680D	BnaA04g29230D	269	other
BnaA01g19680D	BnaA05g07210D	269	other
BnaA01g19680D	BnaA05g27160D	269	other
BnaA01g19680D	BnaA05g27190D	269	other
BnaA01g19680D	BnaAnng09380D	269	other
BnaA01g19680D	BnaC03g20660D	269	other
BnaA01g19680D	BnaC03g73560D	269	other
BnaA01g19680D	BnaC04g08010D	269	other
BnaA01g19680D	BnaC05g41290D	269	other
BnaA01g19680D	BnaA01g22450D	218	other
BnaA01g19680D	BnaA02g05140D	218	other
BnaA01g19680D	BnaA02g14920D	218	other
BnaA01g19680D	BnaA10g14620D	218	other
BnaA01g19680D	BnaC09g36930D	218	other
BnaA01g19680D	BnaA05g01360D	571	other
BnaA01g19680D	BnaC04g07440D	571	other
BnaA01g19680D	BnaC04g52090D	571	other
BnaA01g19680D	BnaA07g08500D	271	other
BnaA01g19680D	BnaA09g27380D	271	other
BnaA01g19680D	BnaC05g50460D	271	other
BnaA01g19680D	BnaC07g10500D	271	other
BnaA01g19680D	BnaA07g08630D	216	other
BnaA01g19680D	BnaA08g05580D	216	other
BnaA01g19680D	BnaA09g27530D	216	other
BnaA01g19680D	BnaC08g09990D	216	other
BnaA01g19680D	BnaCnng41890D	216	other
BnaA01g19680D	BnaCnng41900D	216	other
BnaA01g19680D	BnaCnng66170D	216	other
BnaA01g19680D	BnaUnng04720D	216	other
BnaA01g19680D	BnaA03g53140D	530	other
BnaA01g19680D	BnaA07g02700D	530	other
BnaA01g19680D	BnaC01g44200D	530	other
BnaA01g19680D	BnaC03g47830D	530	other
BnaA01g19680D	BnaA04g17900D	224	other
BnaA01g19680D	BnaC04g13730D	224	other
BnaA01g19680D	BnaC04g41500D	224	other
BnaA01g19680D	BnaA06g14040D	224	other
BnaA01g19680D	BnaA07g11660D	224	other
BnaA01g19680D	BnaA08g31250D	224	other
BnaA01g19680D	BnaC05g15390D	224	other
BnaA01g19680D	BnaC07g48490D	224	other
BnaA01g19680D	BnaC08g19040D	224	other
BnaA01g19680D	BnaA01g32740D	161	other
BnaA01g19680D	BnaA05g30790D	161	other
BnaA01g19680D	BnaC05g45240D	161	other
BnaA01g19680D	BnaA04g26850D	215	other
BnaA01g19680D	BnaC04g51520D	215	other
BnaA01g19680D	BnaA03g23610D	167	other
BnaA01g19680D	BnaC03g28030D	167	other
BnaA01g19680D	BnaCnng59830D	167	other
BnaA01g19680D	BnaA06g21800D	231	other
BnaA01g19680D	BnaA09g06030D	231	other
BnaA01g19680D	BnaC03g51710D	231	other
BnaA01g19680D	BnaC09g05590D	231	other
BnaA01g19680D	BnaA09g47030D	211	other
BnaA01g19680D	BnaAnng36290D	211	other
BnaA01g19680D	BnaC08g15650D	211	other
BnaA01g19680D	BnaC08g41070D	211	other
BnaA01g19680D	BnaCnng31550D	211	other
BnaA01g19680D	BnaA04g20290D	307	other
BnaA01g19680D	BnaA05g09150D	307	other
BnaA01g19680D	BnaC04g10560D	307	other
BnaA01g19680D	BnaA07g26860D	271	other
BnaA01g19680D	BnaA07g37190D	271	other
BnaA01g19680D	BnaA08g19270D	271	other
BnaA01g19680D	BnaC02g17810D	271	other
BnaA01g19680D	BnaC03g75640D	271	other
BnaA01g19680D	BnaCnng61150D	271	other
BnaA01g19680D	BnaA06g06010D	335	other
BnaA01g19680D	BnaC05g07560D	335	other
BnaA01g19680D	BnaA06g18830D	340	other
BnaA01g19680D	BnaC03g54740D	340	other
BnaA01g19680D	BnaA08g07840D	262	other
BnaA01g19680D	BnaC08g09030D	262	other
BnaA01g19680D	BnaA02g35040D	274	other
BnaA01g19680D	BnaC02g06570D	274	other
BnaA01g19680D	BnaA04g04160D	339	other
BnaA01g19680D	BnaAnng31650D	339	other
BnaA01g19680D	BnaC04g26350D	339	other
BnaA01g19680D	BnaC08g25160D	339	other
BnaA01g19680D	BnaA07g13430D	331	other
BnaA01g19680D	BnaC04g16450D	331	other
BnaA01g19680D	BnaA07g38280D	204	other
BnaA01g19680D	BnaC06g43070D	204	other
BnaA01g19680D	BnaA05g24380D	248	other
BnaA01g19680D	BnaC05g38390D	248	other
BnaA01g19680D	BnaA06g24990D	190	other
BnaA01g19680D	BnaC03g48580D	190	other
BnaA01g19680D	BnaA01g28500D	240	other
BnaA01g19680D	BnaC01g35800D	240	other
BnaA01g19680D	BnaA02g13600D	250	other
BnaA01g19680D	BnaC02g17760D	250	other
BnaA01g19680D	BnaA02g31890D	465	other
BnaA01g19680D	BnaA06g39380D	465	other
BnaA01g19680D	BnaA09g04510D	465	other
BnaA01g19680D	BnaC02g48550D	465	other
BnaA01g19680D	BnaC07g29140D	465	other
BnaA01g19680D	BnaC09g03930D	465	other
BnaA01g19680D	BnaA05g02990D	155	other
BnaA01g19680D	BnaA05g03000D	155	other
BnaA01g19680D	BnaC04g52620D	155	other
BnaA01g19680D	BnaUnng05090D	155	other
BnaA01g19680D	BnaA07g36970D	465	other
BnaA01g19680D	BnaA08g19660D	465	other
BnaA01g19680D	BnaC07g12200D	465	other
BnaA01g19680D	BnaCnng04500D	465	other
BnaA01g19680D	BnaA01g05490D	440	other
BnaA01g19680D	BnaA06g40640D	440	other
BnaA01g19680D	BnaA08g16520D	440	other
BnaA01g19680D	BnaC01g40650D	440	other
BnaA01g19680D	BnaC01g40660D	440	other
BnaA01g19680D	BnaC03g60590D	440	other
BnaA01g19680D	BnaC07g47240D	440	other
BnaA01g19680D	BnaA02g35090D	392	other
BnaA01g19680D	BnaA03g07180D	392	other
BnaA01g19680D	BnaAnng26790D	392	other
BnaA01g19680D	BnaC02g08170D	392	other
BnaA01g19680D	BnaC03g09100D	392	other
BnaA01g19680D	BnaC09g39250D	392	other
BnaA01g19680D	BnaA04g00520D	185	other
BnaA01g19680D	BnaA09g21650D	185	other
BnaA01g19680D	BnaA09g55570D	185	other
BnaA01g19680D	BnaC06g18270D	185	other
BnaA01g19680D	BnaC08g31700D	185	other
BnaA01g19680D	BnaCnng44400D	185	other
BnaA01g19680D	BnaA01g02170D	408	other
BnaA01g19680D	BnaA10g13450D	408	other
BnaA01g19680D	BnaC01g03300D	408	other
BnaA01g19680D	BnaC09g53950D	408	other
BnaA01g19680D	BnaA01g29250D	571	other
BnaA01g19680D	BnaA02g28840D	571	other
BnaA01g19680D	BnaA04g00880D	571	other
BnaA01g19680D	BnaA09g38850D	571	other
BnaA01g19680D	BnaC04g21950D	571	other
BnaA01g19680D	BnaC08g31110D	571	other
BnaA01g19680D	BnaCnng75670D	571	other
BnaA01g19680D	BnaUnng05030D	571	other
BnaA01g19680D	BnaA08g25210D	198	other
BnaA01g19680D	BnaA08g25220D	198	other
BnaA01g19680D	BnaA09g09540D	198	other
BnaA01g19680D	BnaA09g09550D	198	other
BnaA01g19680D	BnaAnng41580D	198	other
BnaA01g19680D	BnaC02g41270D	198	other
BnaA01g19680D	BnaC08g15000D	198	other
BnaA01g19680D	BnaC08g15020D	198	other
BnaA01g19680D	BnaCnng69010D	198	other
BnaA01g19680D	BnaCnng18030D	198	other
BnaA01g19680D	BnaA06g38440D	185	other
BnaA01g19680D	BnaC05g13300D	185	other
BnaA01g19680D	BnaC08g06750D	185	other
BnaA01g19680D	BnaA02g13010D	341	other
BnaA01g19680D	BnaA07g25110D	341	other
BnaA01g19680D	BnaA07g26270D	341	other
BnaA01g19680D	BnaC02g17320D	341	other
BnaA01g19680D	BnaC06g26860D	341	other
BnaA01g19680D	BnaC06g28330D	341	other
BnaA01g19680D	BnaA06g40330D	328	other
BnaA01g19680D	BnaA09g18160D	328	other
BnaA01g19680D	BnaC07g19420D	328	other
BnaA01g19680D	BnaC09g19610D	328	other
BnaA01g19680D	BnaA06g08950D	189	other
BnaA01g19680D	BnaA06g08960D	189	other
BnaA01g19680D	BnaC05g10390D	189	other
BnaA01g19680D	BnaA02g14990D	309	other
BnaA01g19680D	BnaAnng22030D	309	other
BnaA01g19680D	BnaAnng22040D	309	other
BnaA01g19680D	BnaC02g19980D	309	other
BnaA01g19680D	BnaC06g43720D	309	other
BnaA01g19680D	BnaA07g09440D	567	other
BnaA01g19680D	BnaA08g19810D	567	other
BnaA01g19680D	BnaA09g29040D	567	other
BnaA01g19680D	BnaC03g57380D	567	other
BnaA01g19680D	BnaC05g20240D	567	other
BnaA01g19680D	BnaC07g12310D	567	other
BnaA01g19680D	BnaA10g09490D	229	other
BnaA01g19680D	BnaC09g31650D	229	other
BnaA01g19680D	BnaA01g04490D	647	other
BnaA01g19680D	BnaA08g12160D	647	other
BnaA01g19680D	BnaC01g05950D	647	other
BnaA01g19680D	BnaC03g67260D	647	other
BnaA01g19680D	BnaCnng74730D	647	other
BnaA01g19680D	BnaA04g01810D	189	other
BnaA01g19680D	BnaA07g18050D	189	other
BnaA01g19680D	BnaA09g55330D	189	other
BnaA01g19680D	BnaC04g23360D	189	other
BnaA01g19680D	BnaC06g16910D	189	other
BnaA01g19680D	BnaC06g27260D	189	other
BnaA01g19680D	BnaC08g29520D	189	other
BnaA01g19680D	BnaC08g29530D	189	other
BnaA01g19680D	BnaC09g10650D	189	other
BnaA01g19680D	BnaA05g33390D	625	other
BnaA01g19680D	BnaAnng12670D	625	other
BnaA01g19680D	BnaCnng05900D	625	other
BnaA01g19680D	BnaA02g00930D	840	other
BnaA01g19680D	BnaAnng37780D	840	other
BnaA01g19680D	BnaC09g45330D	840	other
BnaA01g19680D	BnaCnng19720D	840	other
BnaA01g19680D	BnaA08g23900D	240	other
BnaA01g19680D	BnaA09g56750D	240	other
BnaA01g19680D	BnaC05g11640D	240	other
BnaA01g19680D	BnaC08g16590D	240	other
BnaA01g19680D	BnaC08g38940D	240	other
BnaA01g19680D	BnaA02g13870D	183	other
BnaA01g19680D	BnaA07g27150D	183	other
BnaA01g19680D	BnaC02g18270D	183	other
BnaA01g19680D	BnaC06g30050D	183	other
BnaA01g19680D	BnaA04g02270D	431	other
BnaA01g19680D	BnaA07g17440D	431	other
BnaA01g19680D	BnaA09g36970D	431	other
BnaA01g19680D	BnaC06g42710D	431	other
BnaA01g19680D	BnaC08g28680D	431	other
BnaA01g19680D	BnaA06g24160D	321	other
BnaA01g19680D	BnaCnng28250D	321	other
BnaA01g19680D	BnaA07g27740D	390	other
BnaA01g19680D	BnaCnng61410D	390	other
BnaA01g19680D	BnaA10g08930D	306	other
BnaA01g19680D	BnaA10g28850D	306	other
BnaA01g19680D	BnaAnng06520D	306	other
BnaA01g19680D	BnaAnng32790D	306	other
BnaA01g19680D	BnaCnng63720D	306	other
BnaA01g19680D	BnaA03g19280D	150	other
BnaA01g19680D	BnaA04g23600D	150	other
BnaA01g19680D	BnaA05g01910D	150	other
BnaA01g19680D	BnaC03g22980D	150	other
BnaA01g19680D	BnaC04g01610D	150	other
BnaA01g19680D	BnaC04g47480D	150	other
BnaA01g19680D	BnaA05g28510D	217	other
BnaA01g19680D	BnaC05g42830D	217	other
BnaA01g19680D	BnaA07g37050D	273	other
BnaA01g19680D	BnaC07g12170D	273	other
BnaA01g19680D	BnaAnng10690D	250	other
BnaA01g19680D	BnaC05g46990D	250	other
BnaA01g19680D	BnaA02g33370D	523	other
BnaA01g19680D	BnaA06g21790D	523	other
BnaA01g19680D	BnaC03g51740D	523	other
BnaA02g17280D	BnaA03g58950D	279	other
BnaA02g17280D	BnaC07g41400D	279	other
BnaA02g17280D	BnaA03g56900D	161	other
BnaA02g17280D	BnaA05g05020D	161	other
BnaA02g17280D	BnaC03g25370D	161	other
BnaA02g17280D	BnaC04g04400D	161	other
BnaA02g17280D	BnaA07g20300D	173	other
BnaA02g17280D	BnaC02g25850D	173	other
BnaA02g17280D	BnaC06g19790D	173	other
BnaA02g17280D	BnaA01g01350D	168	inter
BnaA02g17280D	BnaA03g59180D	168	inter
BnaA02g17280D	BnaC01g02360D	168	inter
BnaA02g17280D	BnaCnng61180D	168	inter
BnaA02g17280D	BnaA08g27480D	557	other
BnaA02g17280D	BnaC08g46280D	557	other
BnaA02g17280D	BnaA10g27610D	549	other
BnaA02g17280D	BnaCnng03900D	549	other
BnaA02g17280D	BnaA03g39870D	161	other
BnaA02g17280D	BnaAnng27820D	161	other
BnaA02g17280D	BnaC02g41900D	161	other
BnaA02g17280D	BnaC07g49840D	161	other
BnaA02g17280D	BnaA01g04940D	161	other
BnaA02g17280D	BnaA01g04960D	161	other
BnaA02g17280D	BnaA03g51810D	161	other
BnaA02g17280D	BnaA09g55820D	161	other
BnaA02g17280D	BnaC01g06510D	161	other
BnaA02g17280D	BnaC01g06530D	161	other
BnaA02g17280D	BnaC07g43570D	161	other
BnaA02g17280D	BnaC08g33530D	161	other
BnaA02g17280D	BnaA02g25780D	183	other
BnaA02g17280D	BnaA02g25790D	183	other
BnaA02g17280D	BnaA06g34780D	183	other
BnaA02g17280D	BnaA09g18740D	183	other
BnaA02g17280D	BnaC02g34020D	183	other
BnaA02g17280D	BnaC02g34030D	183	other
BnaA02g17280D	BnaC07g20940D	183	other
BnaA02g17280D	BnaA03g17600D	358	other
BnaA02g17280D	BnaA03g18790D	358	other
BnaA02g17280D	BnaA04g21830D	358	other
BnaA02g17280D	BnaA05g06540D	358	other
BnaA02g17280D	BnaAnng30780D	358	other
BnaA02g17280D	BnaC03g21070D	358	other
BnaA02g17280D	BnaC04g07210D	358	other
BnaA02g17280D	BnaC04g45700D	358	other
BnaA02g17280D	BnaC08g29510D	450	other
BnaA02g17280D	BnaA10g26300D	183	other
BnaA02g17280D	BnaAnng00810D	183	other
BnaA02g17280D	BnaC02g02900D	183	other
BnaA02g17280D	BnaC03g01440D	183	other
BnaA02g17280D	BnaCnng10680D	183	other
BnaA02g17280D	BnaA02g35530D	161	other
BnaA02g17280D	BnaAnng41910D	161	other
BnaA02g17280D	BnaC03g74080D	161	other
BnaA02g17280D	BnaCnng69610D	161	other
BnaA02g17280D	BnaCnng28030D	161	other
BnaA02g17280D	BnaCnng75540D	161	other
BnaA02g17280D	BnaCnng17820D	161	other
BnaA02g17280D	BnaAnng26720D	161	other
BnaA02g17280D	BnaC02g19450D	161	other
BnaA02g17280D	BnaC02g19460D	161	other
BnaA02g17280D	BnaC06g27940D	161	other
BnaA02g17280D	BnaA04g11060D	499	other
BnaA02g17280D	BnaCnng33960D	499	other
BnaA02g17280D	BnaA02g00610D	155	other
BnaA02g17280D	BnaA10g21690D	155	other
BnaA02g17280D	BnaC02g00230D	155	other
BnaA02g17280D	BnaC09g45960D	155	other
BnaA02g17280D	BnaA02g03860D	625	other
BnaA02g17280D	BnaC02g07720D	625	other
BnaA02g17280D	BnaC09g39750D	625	other
BnaA02g17280D	BnaCnng32580D	625	other
BnaA02g17280D	BnaA07g12160D	414	other
BnaA02g17280D	BnaA09g07590D	414	other
BnaA02g17280D	BnaAnng19120D	414	other
BnaA02g17280D	BnaC02g16560D	414	other
BnaA02g17280D	BnaC07g16340D	414	other
BnaA02g17280D	BnaC09g07530D	414	other
BnaA02g17280D	BnaAnng05510D	557	other
BnaA02g17280D	BnaC02g14240D	557	other
BnaA02g17280D	BnaC02g31520D	557	other
BnaA02g17280D	BnaC02g31530D	557	other
BnaA02g17280D	BnaC07g18340D	557	other
BnaA02g17280D	BnaA07g32120D	239	other
BnaA02g17280D	BnaC06g36500D	239	other
BnaA02g17280D	BnaA04g04150D	390	other
BnaA02g17280D	BnaA07g16360D	390	other
BnaA02g17280D	BnaC04g26340D	390	other
BnaA02g17280D	BnaC06g15190D	390	other
BnaA02g17280D	BnaCnng28910D	390	other
BnaA02g17280D	BnaA03g17800D	153	other
BnaA02g17280D	BnaA04g21990D	153	other
BnaA02g17280D	BnaA09g54380D	153	other
BnaA02g17280D	BnaAnng34820D	153	other
BnaA02g17280D	BnaAnng32690D	153	other
BnaA02g17280D	BnaC04g56590D	153	other
BnaA02g17280D	BnaC04g56600D	153	other
BnaA02g17280D	BnaCnng48990D	153	other
BnaA02g17280D	BnaA07g14610D	154	other
BnaA02g17280D	BnaC09g16800D	154	other
BnaA02g17280D	BnaA07g07190D	212	other
BnaA02g17280D	BnaC05g23680D	212	other
BnaA02g17280D	BnaC07g08810D	212	other
BnaA02g17280D	BnaA06g17280D	161	other
BnaA02g17280D	BnaC03g57070D	161	other
BnaA02g17280D	BnaA10g23330D	216	other
BnaA02g17280D	BnaC09g47980D	216	other
BnaA02g17280D	BnaA06g12430D	557	other
BnaA02g17280D	BnaA08g22710D	557	other
BnaA02g17280D	BnaA09g44630D	557	other
BnaA02g17280D	BnaA09g44640D	557	other
BnaA02g17280D	BnaA09g44650D	557	other
BnaA02g17280D	BnaC05g14030D	557	other
BnaA02g17280D	BnaC08g17860D	557	other
BnaA02g17280D	BnaC08g37340D	557	other
BnaA02g17280D	BnaC08g37360D	557	other
BnaA02g17280D	BnaC08g37370D	557	other
BnaA02g17280D	BnaA01g36800D	252	other
BnaA02g17280D	BnaC05g44950D	252	other
BnaA02g17280D	BnaA03g13580D	275	other
BnaA02g17280D	BnaC03g16490D	275	other
BnaA02g17280D	BnaC03g27870D	275	other
BnaA02g17280D	BnaC09g27080D	275	other
BnaA02g17280D	BnaA03g51820D	181	other
BnaA02g17280D	BnaC07g43580D	181	other
BnaA02g17280D	BnaA01g04480D	165	other
BnaA02g17280D	BnaA03g52120D	165	other
BnaA02g17280D	BnaA08g12150D	165	other
BnaA02g17280D	BnaC01g05930D	165	other
BnaA02g17280D	BnaC03g67130D	165	other
BnaA02g17280D	BnaC07g43850D	165	other
BnaA02g17280D	BnaC07g43860D	165	other
BnaA02g17280D	BnaA03g41590D	351	other
BnaA02g17280D	BnaA03g57030D	351	other
BnaA02g17280D	BnaA09g32520D	351	other
BnaA02g17280D	BnaC03g27660D	351	other
BnaA02g17280D	BnaC07g32670D	351	other
BnaA02g17280D	BnaC08g23390D	351	other
BnaA02g17280D	BnaA07g08530D	175	other
BnaA02g17280D	BnaA09g27390D	175	other
BnaA02g17280D	BnaC07g10580D	175	other
BnaA02g17280D	BnaA06g13970D	223	inter
BnaA02g17280D	BnaC02g22360D	223	other
BnaA02g17280D	BnaC07g05440D	223	inter
BnaA02g17280D	BnaC07g15630D	223	inter
BnaA02g17280D	BnaCnng57210D	223	inter
BnaA02g17280D	BnaA03g57720D	155	other
BnaA02g17280D	BnaC03g44680D	155	other
BnaA02g17280D	BnaA02g29470D	216	other
BnaA02g17280D	BnaA06g31250D	216	other
BnaA02g17280D	BnaA09g02390D	216	other
BnaA02g17280D	BnaC02g37560D	216	other
BnaA02g17280D	BnaC02g37570D	216	other
BnaA02g17280D	BnaC09g01920D	216	other
BnaA02g17280D	BnaCnng45670D	216	other
BnaA02g17280D	BnaA05g12910D	161	other
BnaA02g17280D	BnaC06g12070D	161	other
BnaA02g17280D	BnaA02g11190D	161	other
BnaA02g17280D	BnaC02g15480D	161	other
BnaA02g17280D	BnaA02g31040D	502	other
BnaA02g17280D	BnaA06g29190D	502	other
BnaA02g17280D	BnaA09g03450D	502	other
BnaA02g17280D	BnaC02g39370D	502	other
BnaA02g17280D	BnaC09g02740D	502	other
BnaA02g17280D	BnaA06g07360D	185	other
BnaA02g17280D	BnaA08g25130D	185	other
BnaA02g17280D	BnaC05g08770D	185	other
BnaA02g17280D	BnaC08g15080D	185	other
BnaA02g17280D	BnaA06g07270D	150	other
BnaA02g17280D	BnaA08g31650D	150	other
BnaA02g17280D	BnaAnng33870D	150	other
BnaA02g17280D	BnaAnng33880D	150	other
BnaA02g17280D	BnaC01g44720D	150	other
BnaA02g17280D	BnaC08g07160D	150	other
BnaA02g17280D	BnaCnng75820D	150	other
BnaA02g17280D	BnaCnng41000D	150	other
BnaA02g17280D	BnaCnng41010D	150	other
BnaA02g17280D	BnaCnng18080D	150	other
BnaA02g17280D	BnaA07g03650D	150	other
BnaA02g17280D	BnaCnng38460D	150	other
BnaA02g17280D	BnaA07g16590D	479	other
BnaA02g17280D	BnaA09g54800D	479	other
BnaA02g17280D	BnaC06g15560D	479	other
BnaA02g17280D	BnaA09g55010D	430	other
BnaA02g17280D	BnaC08g25810D	430	other
BnaA02g17280D	BnaA06g09870D	152	other
BnaA02g17280D	BnaA06g09880D	152	other
BnaA02g17280D	BnaA08g31540D	152	other
BnaA02g17280D	BnaC05g11490D	152	other
BnaA02g17280D	BnaC05g11500D	152	other
BnaA02g17280D	BnaC08g16540D	152	other
BnaA02g17280D	BnaCnng60340D	152	other
BnaA02g17280D	BnaA02g00440D	282	other
BnaA02g17280D	BnaA03g02860D	282	other
BnaA02g17280D	BnaA10g21970D	282	other
BnaA02g17280D	BnaC02g00420D	282	other
BnaA02g17280D	BnaC03g04220D	282	other
BnaA02g17280D	BnaC09g46360D	282	other
BnaA02g17280D	BnaA04g03960D	150	other
BnaA02g17280D	BnaA04g03970D	150	other
BnaA02g17280D	BnaA09g34520D	150	other
BnaA02g17280D	BnaC08g25470D	150	other
BnaA02g17280D	BnaA03g27750D	161	other
BnaA02g17280D	BnaAnng16870D	161	other
BnaA02g17280D	BnaC03g32790D	161	other
BnaA02g17280D	BnaC05g48480D	161	other
BnaA02g17280D	BnaA01g14640D	231	other
BnaA02g17280D	BnaA03g47250D	231	other
BnaA02g17280D	BnaC01g17210D	231	other
BnaA02g17280D	BnaC07g39450D	231	other
BnaA02g17280D	BnaA01g12730D	465	other
BnaA02g17280D	BnaA09g21310D	465	other
BnaA02g17280D	BnaC01g14460D	465	other
BnaA02g17280D	BnaC09g23710D	465	other
BnaA02g17280D	BnaA10g07100D	224	other
BnaA02g17280D	BnaAnng29390D	224	other
BnaA02g17280D	BnaC02g14030D	224	other
BnaA02g17280D	BnaCnng55890D	224	other
BnaA02g17280D	BnaA01g22330D	161	other
BnaA02g17280D	BnaA04g04120D	203	inter
BnaA02g17280D	BnaA09g34300D	203	inter
BnaA02g17280D	BnaC04g26320D	203	inter
BnaA02g17280D	BnaC08g25250D	203	inter
BnaA02g17280D	BnaA02g19620D	412	other
BnaA02g17280D	BnaA01g26700D	161	other
BnaA02g17280D	BnaA03g34820D	161	other
BnaA02g17280D	BnaC01g34090D	161	other
BnaA02g17280D	BnaC05g51920D	161	other
BnaA02g17280D	BnaCnng23770D	161	other
BnaA02g17280D	BnaA06g38770D	431	other
BnaA02g17280D	BnaA09g06580D	431	other
BnaA02g17280D	BnaC03g50910D	431	other
BnaA02g17280D	BnaCnng15860D	431	other
BnaA02g17280D	BnaA01g02030D	155	other
BnaA02g17280D	BnaC01g03170D	155	other
BnaA02g17280D	BnaA03g21800D	353	other
BnaA02g17280D	BnaA05g00500D	353	other
BnaA02g17280D	BnaC03g26070D	353	other
BnaA02g17280D	BnaC04g27450D	353	other
BnaA02g17280D	BnaC04g51940D	353	other
BnaA02g17280D	BnaA02g02680D	457	other
BnaA02g17280D	BnaA10g18650D	457	other
BnaA02g17280D	BnaC02g06120D	457	other
BnaA02g17280D	BnaC09g42280D	457	other
BnaA02g17280D	BnaA04g05090D	438	other
BnaA02g17280D	BnaCnng32860D	438	other
BnaA02g17280D	BnaCnng59890D	438	other
BnaA02g17280D	BnaA07g25950D	311	other
BnaA02g17280D	BnaC06g27570D	311	other
BnaA02g17280D	BnaA03g31000D	215	other
BnaA02g17280D	BnaA05g37110D	215	other
BnaA02g17280D	BnaC03g36310D	215	other
BnaA02g17280D	BnaC05g43660D	215	other
BnaA02g17280D	BnaC06g25460D	215	other
BnaA02g17280D	BnaA03g56890D	557	other
BnaA02g17280D	BnaA04g26330D	557	other
BnaA02g17280D	BnaC03g25360D	557	other
BnaA02g17280D	BnaC04g50380D	557	other
BnaA02g17280D	BnaA02g04460D	418	other
BnaA02g17280D	BnaA02g04470D	418	other
BnaA02g17280D	BnaA03g07730D	418	other
BnaA02g17280D	BnaA03g07740D	418	other
BnaA02g17280D	BnaA10g15400D	418	other
BnaA02g17280D	BnaA10g15410D	418	other
BnaA02g17280D	BnaAnng22100D	418	other
BnaA02g17280D	BnaC02g09000D	418	other
BnaA02g17280D	BnaC02g09010D	418	other
BnaA02g17280D	BnaC02g25650D	418	other
BnaA02g17280D	BnaC03g09730D	418	other
BnaA02g17280D	BnaC03g09740D	418	other
BnaA02g17280D	BnaC03g59650D	418	other
BnaA02g17280D	BnaC08g07660D	418	other
BnaA02g17280D	BnaC09g37880D	418	other
BnaA02g17280D	BnaC09g37930D	418	other
BnaA02g17280D	BnaA04g27370D	624	other
BnaA02g17280D	BnaA09g38450D	624	other
BnaA02g17280D	BnaC04g55100D	624	other
BnaA02g17280D	BnaC08g30590D	624	other
BnaA02g17280D	BnaA05g11640D	161	other
BnaA02g17280D	BnaA05g11650D	161	other
BnaA02g17280D	BnaC04g13290D	161	other
BnaA02g17280D	BnaAnng27870D	169	other
BnaA02g17280D	BnaC04g04180D	169	other
BnaA02g17280D	BnaC04g56960D	169	other
BnaA02g17280D	BnaA05g04960D	182	other
BnaA02g17280D	BnaC04g04310D	182	other
BnaA02g17280D	BnaC04g50340D	182	other
BnaA02g17280D	BnaA01g29050D	161	other
BnaA02g17280D	BnaA03g33680D	161	other
BnaA02g17280D	BnaA05g24520D	161	other
BnaA02g17280D	BnaC01g36430D	161	other
BnaA02g17280D	BnaC03g38850D	161	other
BnaA02g17280D	BnaCnng59700D	161	other
BnaA02g17280D	BnaA02g17290D	349	other
BnaA02g17280D	BnaA07g21640D	349	other
BnaA02g17280D	BnaAnng09120D	349	other
BnaA02g17280D	BnaC02g23750D	349	other
BnaA02g17280D	BnaC06g22310D	349	other
BnaA02g17280D	BnaC06g36260D	349	other
BnaA02g17280D	BnaA06g08740D	215	other
BnaA02g17280D	BnaA09g57150D	215	other
BnaA02g17280D	BnaC05g10050D	215	other
BnaA02g17280D	BnaC08g40210D	215	other
BnaA02g17280D	BnaA01g19680D	219	inter
BnaA02g17280D	BnaA09g24090D	219	other
BnaA02g17280D	BnaA09g31700D	219	inter
BnaA02g17280D	BnaC01g23660D	219	other
BnaA02g17280D	BnaC08g48470D	219	inter
BnaA02g17280D	BnaA03g30890D	450	other
BnaA02g17280D	BnaA03g30920D	450	other
BnaA02g17280D	BnaC03g33990D	450	other
BnaA02g17280D	BnaA01g16120D	235	other
BnaA02g17280D	BnaA03g48400D	235	other
BnaA02g17280D	BnaC04g52200D	235	other
BnaA02g17280D	BnaC07g02570D	235	other
BnaA02g17280D	BnaC07g40410D	235	other
BnaA02g17280D	BnaCnng28880D	235	other
BnaA02g17280D	BnaCnng29710D	235	other
BnaA02g17280D	BnaA01g18740D	163	other
BnaA02g17280D	BnaA05g35360D	163	other
BnaA02g17280D	BnaA08g05650D	163	other
BnaA02g17280D	BnaC01g22500D	163	other
BnaA02g17280D	BnaC06g11390D	163	other
BnaA02g17280D	BnaC08g10150D	163	other
BnaA02g17280D	BnaA02g16200D	214	other
BnaA02g17280D	BnaA07g22900D	214	other
BnaA02g17280D	BnaC02g21680D	214	other
BnaA02g17280D	BnaC06g23880D	214	other
BnaA02g17280D	BnaA04g05130D	459	other
BnaA02g17280D	BnaA07g15850D	459	other
BnaA02g17280D	BnaA09g33270D	459	other
BnaA02g17280D	BnaAnng07360D	459	other
BnaA02g17280D	BnaC03g20100D	459	other
BnaA02g17280D	BnaC06g14240D	459	other
BnaA02g17280D	BnaC08g24080D	459	other
BnaA02g17280D	BnaCnng50230D	459	other
BnaA02g17280D	BnaA03g02470D	161	other
BnaA02g17280D	BnaAnng06150D	161	other
BnaA02g17280D	BnaC02g01170D	161	other
BnaA02g17280D	BnaC03g03480D	161	other
BnaA02g17280D	BnaC09g47560D	161	other
BnaA02g17280D	BnaAnng02150D	275	other
BnaA02g17280D	BnaC06g08330D	275	other
BnaA02g17280D	BnaC06g42380D	372	other
BnaA02g17280D	BnaC06g42390D	372	other
BnaA02g17280D	BnaC06g42400D	372	other
BnaA02g17280D	BnaCnng11290D	372	other
BnaA02g17280D	BnaA09g12730D	257	other
BnaA02g17280D	BnaC04g19980D	257	other
BnaA02g17280D	BnaC09g13080D	257	other
BnaA02g17280D	BnaA05g18020D	151	other
BnaA02g17280D	BnaC05g28450D	151	other
BnaA02g17280D	BnaC08g07580D	151	other
BnaA02g17280D	BnaA05g08020D	161	other
BnaA02g17280D	BnaAnng07530D	161	other
BnaA02g17280D	BnaC04g09030D	161	other
BnaA02g17280D	BnaA10g20370D	428	inter
BnaA02g17280D	BnaC09g44400D	428	inter
BnaA02g17280D	BnaCnng70210D	428	inter
BnaA02g17280D	BnaA07g19300D	523	other
BnaA02g17280D	BnaC06g18500D	523	other
BnaA02g17280D	BnaA02g02840D	161	other
BnaA02g17280D	BnaA10g18420D	161	other
BnaA02g17280D	BnaC02g06280D	161	other
BnaA02g17280D	BnaC09g41980D	161	other
BnaA02g17280D	BnaCnng63700D	161	other
BnaA02g17280D	BnaA05g13660D	274	other
BnaA02g17280D	BnaA08g29320D	274	other
BnaA02g17280D	BnaAnng23800D	274	other
BnaA02g17280D	BnaAnng23810D	274	other
BnaA02g17280D	BnaAnng24700D	274	other
BnaA02g17280D	BnaAnng25430D	274	other
BnaA02g17280D	BnaC03g69160D	274	other
BnaA02g17280D	BnaC03g69190D	274	other
BnaA02g17280D	BnaC03g70660D	274	other
BnaA02g17280D	BnaC03g77690D	274	other
BnaA02g17280D	BnaC06g07320D	274	other
BnaA02g17280D	BnaC06g11020D	274	other
BnaA02g17280D	BnaCnng77260D	274	other
BnaA02g17280D	BnaCnng39880D	274	other
BnaA02g17280D	BnaCnng39890D	274	other
BnaA02g17280D	BnaA02g27250D	173	other
BnaA02g17280D	BnaA06g39810D	173	other
BnaA02g17280D	BnaA09g19420D	173	other
BnaA02g17280D	BnaC02g35110D	173	other
BnaA02g17280D	BnaC07g22490D	173	other
BnaA02g17280D	BnaC09g22090D	173	other
BnaA02g17280D	BnaA02g21340D	231	other
BnaA02g17280D	BnaA09g20980D	231	other
BnaA02g17280D	BnaC02g46740D	231	other
BnaA02g17280D	BnaCnng22160D	231	other
BnaA02g17280D	BnaA05g04340D	430	other
BnaA02g17280D	BnaC04g05220D	430	other
BnaA02g17280D	BnaA05g30940D	262	other
BnaA02g17280D	BnaAnng03220D	262	other
BnaA02g17280D	BnaC05g45420D	262	other
BnaA02g17280D	BnaA09g38870D	183	other
BnaA02g17280D	BnaC08g31090D	183	other
BnaA02g17280D	BnaA02g16170D	461	other
BnaA02g17280D	BnaC02g21550D	461	other
BnaA02g17280D	BnaA06g17500D	231	other
BnaA02g17280D	BnaCnng69780D	231	other
BnaA02g17280D	BnaA01g20650D	151	other
BnaA02g17280D	BnaA01g24500D	151	other
BnaA02g17280D	BnaA05g16890D	151	other
BnaA02g17280D	BnaC05g29690D	151	other
BnaA02g17280D	BnaCnng14150D	151	other
BnaA02g17280D	BnaA08g20500D	304	other
BnaA02g17280D	BnaA08g20510D	304	other
BnaA02g17280D	BnaA09g31100D	304	other
BnaA02g17280D	BnaAnng30720D	304	other
BnaA02g17280D	BnaC05g18670D	304	other
BnaA02g17280D	BnaC08g06320D	304	other
BnaA02g17280D	BnaCnng70390D	304	other
BnaA02g17280D	BnaA01g25940D	319	other
BnaA02g17280D	BnaC01g33140D	319	other
BnaA02g17280D	BnaA05g01360D	465	other
BnaA02g17280D	BnaC04g07440D	465	other
BnaA02g17280D	BnaC04g52090D	465	other
BnaA02g17280D	BnaA07g12710D	243	inter
BnaA02g17280D	BnaC07g16800D	243	inter
BnaA02g17280D	BnaA06g25270D	153	other
BnaA02g17280D	BnaA09g52850D	153	other
BnaA02g17280D	BnaC03g48370D	153	other
BnaA02g17280D	BnaC03g76680D	153	other
BnaA02g17280D	BnaC09g09740D	153	other
BnaA02g17280D	BnaUnng04770D	153	other
BnaA02g17280D	BnaA06g14040D	162	other
BnaA02g17280D	BnaA07g11660D	162	other
BnaA02g17280D	BnaA08g31250D	162	other
BnaA02g17280D	BnaC05g15390D	162	other
BnaA02g17280D	BnaC07g48490D	162	other
BnaA02g17280D	BnaC08g19040D	162	other
BnaA02g17280D	BnaA06g21800D	231	other
BnaA02g17280D	BnaA09g06030D	231	other
BnaA02g17280D	BnaC03g51710D	231	other
BnaA02g17280D	BnaC09g05590D	231	other
BnaA02g17280D	BnaA03g23610D	207	other
BnaA02g17280D	BnaC03g28030D	207	other
BnaA02g17280D	BnaCnng59830D	207	other
BnaA02g17280D	BnaA02g07380D	482	other
BnaA02g17280D	BnaAnng38120D	482	other
BnaA02g17280D	BnaAnng17300D	482	other
BnaA02g17280D	BnaC02g10430D	482	other
BnaA02g17280D	BnaC02g10440D	482	other
BnaA02g17280D	BnaC03g12340D	482	other
BnaA02g17280D	BnaCnng69760D	482	other
BnaA02g17280D	BnaA01g29170D	152	other
BnaA02g17280D	BnaA02g11320D	152	other
BnaA02g17280D	BnaA03g34470D	152	other
BnaA02g17280D	BnaA03g54200D	152	other
BnaA02g17280D	BnaA03g58810D	152	other
BnaA02g17280D	BnaA04g01600D	152	other
BnaA02g17280D	BnaA04g09130D	152	other
BnaA02g17280D	BnaA05g13530D	152	other
BnaA02g17280D	BnaA06g03150D	152	other
BnaA02g17280D	BnaA06g09980D	152	other
BnaA02g17280D	BnaA06g25350D	152	other
BnaA02g17280D	BnaA06g26090D	152	other
BnaA02g17280D	BnaA07g08080D	152	other
BnaA02g17280D	BnaA07g28490D	152	other
BnaA02g17280D	BnaA09g26950D	152	other
BnaA02g17280D	BnaA09g54100D	152	other
BnaA02g17280D	BnaAnng10320D	152	other
BnaA02g17280D	BnaC01g23430D	152	other
BnaA02g17280D	BnaC01g25650D	152	other
BnaA02g17280D	BnaC01g27340D	152	other
BnaA02g17280D	BnaC01g44620D	152	other
BnaA02g17280D	BnaC01g44680D	152	other
BnaA02g17280D	BnaC02g07240D	152	other
BnaA02g17280D	BnaC02g23230D	152	other
BnaA02g17280D	BnaC02g30120D	152	other
BnaA02g17280D	BnaC03g16310D	152	other
BnaA02g17280D	BnaC03g18860D	152	other
BnaA02g17280D	BnaC03g39600D	152	other
BnaA02g17280D	BnaC03g39890D	152	other
BnaA02g17280D	BnaC03g39930D	152	other
BnaA02g17280D	BnaC03g43250D	152	other
BnaA02g17280D	BnaC03g47920D	152	other
BnaA02g17280D	BnaC03g55700D	152	other
BnaA02g17280D	BnaC03g63130D	152	other
BnaA02g17280D	BnaC03g75270D	152	other
BnaA02g17280D	BnaC04g05490D	152	other
BnaA02g17280D	BnaC04g15110D	152	other
BnaA02g17280D	BnaC04g31350D	152	other
BnaA02g17280D	BnaC05g11600D	152	other
BnaA02g17280D	BnaC05g32800D	152	other
BnaA02g17280D	BnaC05g36100D	152	other
BnaA02g17280D	BnaC05g36120D	152	other
BnaA02g17280D	BnaC05g36130D	152	other
BnaA02g17280D	BnaC05g38730D	152	other
BnaA02g17280D	BnaC05g41430D	152	other
BnaA02g17280D	BnaC05g41440D	152	other
BnaA02g17280D	BnaC05g43720D	152	other
BnaA02g17280D	BnaC05g44900D	152	other
BnaA02g17280D	BnaC06g28340D	152	other
BnaA02g17280D	BnaC06g30780D	152	other
BnaA02g17280D	BnaC06g31060D	152	other
BnaA02g17280D	BnaC06g37010D	152	other
BnaA02g17280D	BnaC07g06210D	152	other
BnaA02g17280D	BnaC07g16050D	152	other
BnaA02g17280D	BnaC08g09060D	152	other
BnaA02g17280D	BnaC08g16140D	152	other
BnaA02g17280D	BnaC08g16580D	152	other
BnaA02g17280D	BnaC08g38950D	152	other
BnaA02g17280D	BnaC09g07950D	152	other
BnaA02g17280D	BnaC09g25150D	152	other
BnaA02g17280D	BnaC09g39640D	152	other
BnaA02g17280D	BnaCnng25180D	152	other
BnaA02g17280D	BnaCnng31180D	152	other
BnaA02g17280D	BnaCnng75370D	152	other
BnaA02g17280D	BnaCnng33080D	152	other
BnaA02g17280D	BnaCnng05180D	152	other
BnaA02g17280D	BnaCnng42350D	152	other
BnaA02g17280D	BnaCnng14020D	152	other
BnaA02g17280D	BnaCnng14520D	152	other
BnaA02g17280D	BnaCnng63780D	152	other
BnaA02g17280D	BnaUnng05260D	152	other
BnaA02g17280D	BnaA01g25470D	220	other
BnaA02g17280D	BnaA01g36700D	220	other
BnaA02g17280D	BnaA02g10200D	220	other
BnaA02g17280D	BnaA04g17840D	220	other
BnaA02g17280D	BnaA09g08780D	220	other
BnaA02g17280D	BnaC04g41430D	220	other
BnaA02g17280D	BnaC04g41440D	220	other
BnaA02g17280D	BnaC04g41450D	220	other
BnaA02g17280D	BnaC04g41460D	220	other
BnaA02g17280D	BnaC09g09060D	220	other
BnaA02g17280D	BnaAnng41960D	161	other
BnaA02g17280D	BnaAnng07420D	161	other
BnaA02g17280D	BnaC07g09040D	161	other
BnaA02g17280D	BnaCnng67950D	161	other
BnaA02g17280D	BnaA07g36600D	183	other
BnaA02g17280D	BnaA08g18850D	183	other
BnaA02g17280D	BnaC03g58020D	183	other
BnaA02g17280D	BnaC07g11580D	183	other
BnaA02g17280D	BnaA06g18830D	292	other
BnaA02g17280D	BnaC03g54740D	292	other
BnaA02g17280D	BnaA10g01360D	159	other
BnaA02g17280D	BnaC05g01400D	159	other
BnaA02g17280D	BnaA04g04160D	524	other
BnaA02g17280D	BnaAnng31650D	524	other
BnaA02g17280D	BnaC04g26350D	524	other
BnaA02g17280D	BnaC08g25160D	524	other
BnaA02g17280D	BnaA07g13430D	544	other
BnaA02g17280D	BnaC04g16450D	544	other
BnaA02g17280D	BnaA04g09610D	150	other
BnaA02g17280D	BnaA10g18900D	150	other
BnaA02g17280D	BnaC03g65280D	150	other
BnaA02g17280D	BnaC05g19960D	150	other
BnaA02g17280D	BnaA03g07550D	155	other
BnaA02g17280D	BnaA10g15770D	155	other
BnaA02g17280D	BnaC03g09570D	155	other
BnaA02g17280D	BnaC09g38350D	155	other
BnaA02g17280D	BnaA04g05990D	158	other
BnaA02g17280D	BnaC04g28620D	158	other
BnaA02g17280D	BnaA01g02340D	235	other
BnaA02g17280D	BnaA01g25460D	235	other
BnaA02g17280D	BnaC01g03590D	235	other
BnaA02g17280D	BnaA05g02990D	579	other
BnaA02g17280D	BnaA05g03000D	579	other
BnaA02g17280D	BnaC04g52620D	579	other
BnaA02g17280D	BnaUnng05090D	579	other
BnaA02g17280D	BnaA08g13200D	189	other
BnaA02g17280D	BnaA08g13220D	189	other
BnaA02g17280D	BnaC01g08240D	189	other
BnaA02g17280D	BnaC03g68070D	189	other
BnaA02g17280D	BnaA03g30810D	152	other
BnaA02g17280D	BnaA05g29140D	152	other
BnaA02g17280D	BnaA05g29150D	152	other
BnaA02g17280D	BnaA08g06920D	152	other
BnaA02g17280D	BnaC03g36110D	152	other
BnaA02g17280D	BnaC05g43610D	152	other
BnaA02g17280D	BnaC05g43620D	152	other
BnaA02g17280D	BnaCnng39140D	152	other
BnaA02g17280D	BnaA01g05490D	309	other
BnaA02g17280D	BnaA06g40640D	309	other
BnaA02g17280D	BnaA08g16520D	309	other
BnaA02g17280D	BnaC01g40650D	309	other
BnaA02g17280D	BnaC01g40660D	309	other
BnaA02g17280D	BnaC03g60590D	309	other
BnaA02g17280D	BnaC07g47240D	309	other
BnaA02g17280D	BnaA02g35090D	161	other
BnaA02g17280D	BnaA03g07180D	161	other
BnaA02g17280D	BnaAnng26790D	161	other
BnaA02g17280D	BnaC02g08170D	161	other
BnaA02g17280D	BnaC03g09100D	161	other
BnaA02g17280D	BnaC09g39250D	161	other
BnaA02g17280D	BnaA06g26230D	169	other
BnaA02g17280D	BnaA09g05270D	169	other
BnaA02g17280D	BnaC07g30740D	169	other
BnaA02g17280D	BnaC09g04840D	169	other
BnaA02g17280D	BnaA03g16140D	392	other
BnaA02g17280D	BnaA05g08730D	392	other
BnaA02g17280D	BnaC03g19320D	392	other
BnaA02g17280D	BnaC04g09870D	392	other
BnaA02g17280D	BnaA01g02170D	408	other
BnaA02g17280D	BnaA10g13450D	408	other
BnaA02g17280D	BnaC01g03300D	408	other
BnaA02g17280D	BnaC09g53950D	408	other
BnaA02g17280D	BnaA02g32950D	161	other
BnaA02g17280D	BnaA06g26010D	161	other
BnaA02g17280D	BnaA09g05400D	161	other
BnaA02g17280D	BnaC02g41680D	161	other
BnaA02g17280D	BnaC02g42220D	161	other
BnaA02g17280D	BnaC09g04940D	161	other
BnaA02g17280D	BnaA01g29250D	465	other
BnaA02g17280D	BnaA02g28840D	465	other
BnaA02g17280D	BnaA04g00880D	465	other
BnaA02g17280D	BnaA09g38850D	465	other
BnaA02g17280D	BnaC04g21950D	465	other
BnaA02g17280D	BnaC08g31110D	465	other
BnaA02g17280D	BnaCnng75670D	465	other
BnaA02g17280D	BnaUnng05030D	465	other
BnaA02g17280D	BnaA08g25210D	414	other
BnaA02g17280D	BnaA08g25220D	414	other
BnaA02g17280D	BnaA09g09540D	414	other
BnaA02g17280D	BnaA09g09550D	414	other
BnaA02g17280D	BnaAnng41580D	414	other
BnaA02g17280D	BnaC02g41270D	414	other
BnaA02g17280D	BnaC08g15000D	414	other
BnaA02g17280D	BnaC08g15020D	414	other
BnaA02g17280D	BnaCnng69010D	414	other
BnaA02g17280D	BnaCnng18030D	414	other
BnaA02g17280D	BnaA09g14960D	161	other
BnaA02g17280D	BnaCnng71510D	161	other
BnaA02g17280D	BnaA01g09760D	179	other
BnaA02g17280D	BnaA03g43820D	179	other
BnaA02g17280D	BnaC01g11460D	179	other
BnaA02g17280D	BnaC03g62970D	179	other
BnaA02g17280D	BnaC07g35640D	179	other
BnaA02g17280D	BnaC09g24200D	179	other
BnaA02g17280D	BnaA02g14990D	321	other
BnaA02g17280D	BnaAnng22030D	321	other
BnaA02g17280D	BnaAnng22040D	321	other
BnaA02g17280D	BnaC02g19980D	321	other
BnaA02g17280D	BnaC06g43720D	321	other
BnaA02g17280D	BnaA06g28420D	155	other
BnaA02g17280D	BnaA09g03980D	155	other
BnaA02g17280D	BnaC07g28380D	155	other
BnaA02g17280D	BnaCnng24990D	155	other
BnaA02g17280D	BnaA10g09490D	550	other
BnaA02g17280D	BnaC09g31650D	550	other
BnaA02g17280D	BnaA01g04490D	187	other
BnaA02g17280D	BnaA08g12160D	187	other
BnaA02g17280D	BnaC01g05950D	187	other
BnaA02g17280D	BnaC03g67260D	187	other
BnaA02g17280D	BnaCnng74730D	187	other
BnaA02g17280D	BnaA04g01810D	447	other
BnaA02g17280D	BnaA07g18050D	447	other
BnaA02g17280D	BnaA09g55330D	447	other
BnaA02g17280D	BnaC04g23360D	447	other
BnaA02g17280D	BnaC06g16910D	447	other
BnaA02g17280D	BnaC06g27260D	447	other
BnaA02g17280D	BnaC08g29520D	447	other
BnaA02g17280D	BnaC08g29530D	447	other
BnaA02g17280D	BnaC09g10650D	447	other
BnaA02g17280D	BnaA02g00930D	438	other
BnaA02g17280D	BnaAnng37780D	438	other
BnaA02g17280D	BnaC09g45330D	438	other
BnaA02g17280D	BnaCnng19720D	438	other
BnaA02g17280D	BnaA02g05000D	553	other
BnaA02g17280D	BnaA03g56070D	553	other
BnaA02g17280D	BnaA10g14860D	553	other
BnaA02g17280D	BnaC03g10200D	553	other
BnaA02g17280D	BnaC09g37230D	553	other
BnaA02g17280D	BnaA06g37360D	220	other
BnaA02g17280D	BnaA08g16920D	220	other
BnaA02g17280D	BnaC03g60160D	220	other
BnaA02g17280D	BnaC07g47630D	220	other
BnaA02g17280D	BnaA04g07000D	169	other
BnaA02g17280D	BnaA08g05020D	169	other
BnaA02g17280D	BnaCnng14640D	169	other
BnaA02g17280D	BnaA06g24160D	222	other
BnaA02g17280D	BnaCnng28250D	222	other
BnaA02g17280D	BnaA09g13230D	165	other
BnaA02g17280D	BnaCnng68070D	165	other
BnaA02g17280D	BnaA07g12230D	610	other
BnaA02g17280D	BnaA09g07670D	610	other
BnaA02g17280D	BnaC07g16430D	610	other
BnaA02g17280D	BnaC09g07610D	610	other
BnaA02g17280D	BnaA10g09090D	235	other
BnaA02g17280D	BnaC09g31260D	235	other
BnaA02g17280D	BnaA03g19280D	269	other
BnaA02g17280D	BnaA04g23600D	269	other
BnaA02g17280D	BnaA05g01910D	269	other
BnaA02g17280D	BnaC03g22980D	269	other
BnaA02g17280D	BnaC04g01610D	269	other
BnaA02g17280D	BnaC04g47480D	269	other
BnaA02g17280D	BnaA05g28510D	351	other
BnaA02g17280D	BnaC05g42830D	351	other
BnaA02g17280D	BnaA01g08690D	150	other
BnaA02g17280D	BnaA03g43360D	150	other
BnaA02g17280D	BnaAnng13510D	150	other
BnaA02g17280D	BnaC07g34830D	150	other
BnaA02g17280D	BnaCnng23930D	152	other
BnaA02g17280D	BnaA02g33370D	231	other
BnaA02g17280D	BnaA06g21790D	231	other
BnaA02g17280D	BnaC03g51740D	231	other
BnaA02g17280D	BnaA03g14000D	216	other
BnaA02g17280D	BnaA03g14010D	216	other
BnaA02g17280D	BnaA04g17560D	216	other
BnaA02g17280D	BnaA04g17570D	216	other
BnaA02g17280D	BnaA05g11950D	216	other
BnaA02g17280D	BnaC03g16950D	216	other
BnaA02g17280D	BnaC03g16960D	216	other
BnaA02g17280D	BnaC04g14330D	216	other
BnaA02g17280D	BnaC04g41120D	216	other
BnaA02g17280D	BnaC04g41130D	216	other
BnaA02g17280D	BnaA07g01860D	277	inter
BnaA02g17280D	BnaC02g11580D	277	inter
BnaA02g17280D	BnaC07g03690D	277	inter
BnaA03g59180D	BnaA03g56900D	161	other
BnaA03g59180D	BnaA05g05020D	161	other
BnaA03g59180D	BnaC03g25370D	161	other
BnaA03g59180D	BnaC04g04400D	161	other
BnaA03g59180D	BnaA06g34850D	150	other
BnaA03g59180D	BnaA06g35040D	150	other
BnaA03g59180D	BnaA07g10940D	150	other
BnaA03g59180D	BnaA08g22830D	150	other
BnaA03g59180D	BnaA09g44760D	150	other
BnaA03g59180D	BnaC05g47890D	150	other
BnaA03g59180D	BnaC07g20650D	150	other
BnaA03g59180D	BnaC07g48830D	150	other
BnaA03g59180D	BnaC08g17680D	150	other
BnaA03g59180D	BnaC08g37460D	150	other
BnaA03g59180D	BnaA03g26980D	169	other
BnaA03g59180D	BnaC03g31940D	169	other
BnaA03g59180D	BnaA03g02470D	161	other
BnaA03g59180D	BnaAnng06150D	161	other
BnaA03g59180D	BnaC02g01170D	161	other
BnaA03g59180D	BnaC03g03480D	161	other
BnaA03g59180D	BnaC09g47560D	161	other
BnaA03g59180D	BnaA08g15740D	163	other
BnaA03g59180D	BnaC03g61310D	163	other
BnaA03g59180D	BnaC07g46670D	163	other
BnaA03g59180D	BnaA07g08580D	186	other
BnaA03g59180D	BnaC07g10630D	186	other
BnaA03g59180D	BnaC07g10640D	186	other
BnaA03g59180D	BnaA04g14950D	179	other
BnaA03g59180D	BnaA09g40860D	179	other
BnaA03g59180D	BnaC08g33370D	179	other
BnaA03g59180D	BnaCnng62750D	179	other
BnaA03g59180D	BnaA04g08800D	499	other
BnaA03g59180D	BnaA07g12110D	499	other
BnaA03g59180D	BnaC02g34930D	499	other
BnaA03g59180D	BnaC04g13390D	499	other
BnaA03g59180D	BnaC04g31090D	499	other
BnaA03g59180D	BnaC07g16290D	499	other
BnaA03g59180D	BnaA03g54930D	392	other
BnaA03g59180D	BnaA10g27410D	392	other
BnaA03g59180D	BnaAnng29380D	392	other
BnaA03g59180D	BnaC02g03640D	392	other
BnaA03g59180D	BnaC03g00520D	392	other
BnaA03g59180D	BnaCnng03740D	392	other
BnaA03g59180D	BnaA05g08190D	169	other
BnaA03g59180D	BnaAnng07660D	169	other
BnaA03g59180D	BnaC04g09240D	169	other
BnaA03g59180D	BnaA10g20370D	312	inter
BnaA03g59180D	BnaC09g44400D	312	inter
BnaA03g59180D	BnaCnng70210D	312	inter
BnaA03g59180D	BnaA06g09420D	163	other
BnaA03g59180D	BnaA09g56920D	163	other
BnaA03g59180D	BnaC01g12550D	163	other
BnaA03g59180D	BnaC05g10810D	163	other
BnaA03g59180D	BnaC08g39470D	163	other
BnaA03g59180D	BnaA05g16290D	241	other
BnaA03g59180D	BnaA09g24470D	241	other
BnaA03g59180D	BnaAnng15020D	241	other
BnaA03g59180D	BnaAnng15030D	241	other
BnaA03g59180D	BnaC05g24390D	241	other
BnaA03g59180D	BnaC05g28850D	241	other
BnaA03g59180D	BnaC08g07790D	241	other
BnaA03g59180D	BnaA04g19890D	626	other
BnaA03g59180D	BnaA05g09790D	626	other
BnaA03g59180D	BnaCnng05140D	626	other
BnaA03g59180D	BnaC01g08030D	163	other
BnaA03g59180D	BnaC02g48720D	163	other
BnaA03g59180D	BnaCnng40110D	163	other
BnaA03g59180D	BnaA03g01100D	165	other
BnaA03g59180D	BnaA03g01110D	165	other
BnaA03g59180D	BnaAnng00840D	165	other
BnaA03g59180D	BnaC02g02860D	165	other
BnaA03g59180D	BnaC03g01470D	165	other
BnaA03g59180D	BnaC03g01480D	165	other
BnaA03g59180D	BnaAnng14510D	158	other
BnaA03g59180D	BnaAnng05180D	158	other
BnaA03g59180D	BnaC02g16630D	158	other
BnaA03g59180D	BnaC07g15920D	158	other
BnaA03g59180D	BnaCnng59210D	158	other
BnaA03g59180D	BnaCnng59220D	158	other
BnaA03g59180D	BnaA07g06590D	150	other
BnaA03g59180D	BnaC07g08130D	150	other
BnaA03g59180D	BnaA05g17900D	159	other
BnaA03g59180D	BnaC05g50420D	159	other
BnaA03g59180D	BnaC05g50430D	159	other
BnaA03g59180D	BnaCnng49700D	159	other
BnaA03g59180D	BnaA07g04200D	150	other
BnaA03g59180D	BnaC01g25910D	150	other
BnaA03g59180D	BnaA05g02660D	165	other
BnaA03g59180D	BnaC04g02500D	165	other
BnaA03g59180D	BnaA09g40850D	161	other
BnaA03g59180D	BnaC08g33360D	161	other
BnaA03g59180D	BnaA07g08060D	167	other
BnaA03g59180D	BnaCnng32330D	167	other
BnaA03g59180D	BnaA09g04110D	161	other
BnaA03g59180D	BnaC09g03490D	161	other
[truncated: 18,147 more rows]

## Sheet: Table S5
Table S5. The GO enrichment analysis results of interacting proteins.
GO_class	ID	Description	GeneRatio	BgRatio	pvalue	p.adjust	qvalue	geneID	Count
biological_process	GO:0000041	transition metal ion transport	99/3317	377/76374	2.03403e-48	1.84532e-45	8.95828e-46	BnaA01g00540D/BnaA01g08010D/BnaA01g08690D/BnaA01g09100D/BnaA01g33550D/BnaA02g04270D/BnaA02g07380D/BnaA03g07620D/BnaA03g07630D/BnaA03g22340D/BnaA03g22940D/BnaA03g43360D/BnaA03g58240D/BnaA03g59080D/BnaA04g10680D/BnaA04g15930D/BnaA04g17860D/BnaA04g17870D/BnaA04g17900D/BnaA04g26180D/BnaA04g29620D/BnaA05g01130D/BnaA05g01140D/BnaA05g04850D/BnaA05g08700D/BnaA05g24370D/BnaA05g32890D/BnaA06g24750D/BnaA06g…	99
biological_process	GO:0009734	auxin-activated signaling pathway	100/3317	387/76374	3.37044e-48	1.84532e-45	8.95828e-46	BnaA01g07810D/BnaA01g21880D/BnaA01g28670D/BnaA01g33420D/BnaA02g05070D/BnaA02g08100D/BnaA03g15370D/BnaA03g33930D/BnaA03g36950D/BnaA03g43080D/BnaA04g00230D/BnaA04g00520D/BnaA04g07950D/BnaA04g20290D/BnaA04g26850D/BnaA05g09150D/BnaA05g10300D/BnaA05g10850D/BnaA05g16680D/BnaA06g06010D/BnaA06g14040D/BnaA06g21460D/BnaA06g35080D/BnaA07g11660D/BnaA07g19520D/BnaA07g25390D/BnaA07g35660D/BnaA08g05350D/BnaA08g…	100
biological_process	GO:0048443	stamen development	87/3317	326/76374	2.54372e-43	9.28457e-41	4.50729e-41	BnaA01g09760D/BnaA02g08340D/BnaA02g16500D/BnaA02g27250D/BnaA02g29470D/BnaA02g35830D/BnaA03g05650D/BnaA03g10430D/BnaA03g16880D/BnaA03g43820D/BnaA04g00230D/BnaA04g00800D/BnaA04g01810D/BnaA04g04160D/BnaA04g11900D/BnaA04g20290D/BnaA04g21150D/BnaA05g02990D/BnaA05g03000D/BnaA05g09150D/BnaA06g10770D/BnaA06g18830D/BnaA06g31250D/BnaA06g39810D/BnaA07g06100D/BnaA07g13430D/BnaA07g18050D/BnaA07g19230D/BnaA07g…	87
biological_process	GO:0048467	gynoecium development	40/3317	61/76374	1.28606e-39	3.5206e-37	1.70911e-37	BnaA01g14030D/BnaA01g15170D/BnaA02g04890D/BnaA02g14990D/BnaA02g17280D/BnaA03g43080D/BnaA03g47710D/BnaA03g56130D/BnaA06g13970D/BnaA07g21650D/BnaA09g31180D/BnaA09g31200D/BnaA09g44950D/BnaA10g15000D/BnaAnng22030D/BnaAnng22040D/BnaAnng23540D/BnaAnng09150D/BnaAnng31570D/BnaC01g16530D/BnaC01g41560D/BnaC02g19980D/BnaC02g24360D/BnaC03g10110D/BnaC05g18610D/BnaC05g50230D/BnaC06g22330D/BnaC06g24760D/BnaC06g…	40
molecular_function	GO:0004834	tryptophan synthase activity	31/3317	37/76374	9.30635e-37	2.03809e-34	9.89412e-35	BnaA01g16120D/BnaA03g48400D/BnaA04g08710D/BnaA04g27890D/BnaA06g13600D/BnaA07g14490D/BnaA08g25210D/BnaA08g25220D/BnaA09g00950D/BnaA09g09540D/BnaA09g09550D/BnaA09g09630D/BnaA09g34470D/BnaA10g09090D/BnaAnng41580D/BnaC02g41270D/BnaC04g30980D/BnaC04g34360D/BnaC04g34370D/BnaC07g02570D/BnaC07g40410D/BnaC08g15000D/BnaC08g15020D/BnaC08g25400D/BnaC09g00060D/BnaC09g31260D/BnaCnng69010D/BnaCnng28880D/BnaCnng…	31
biological_process	GO:0000162	tryptophan biosynthetic process	45/3317	97/76374	4.05374e-35	7.39807e-33	3.59147e-33	BnaA01g16120D/BnaA02g23570D/BnaA03g01690D/BnaA03g21950D/BnaA03g48400D/BnaA03g57920D/BnaA04g08710D/BnaA04g27890D/BnaA06g13600D/BnaA07g14490D/BnaA08g25210D/BnaA08g25220D/BnaA09g00950D/BnaA09g09540D/BnaA09g09550D/BnaA09g09630D/BnaA09g34470D/BnaA10g09090D/BnaA10g24820D/BnaAnng41580D/BnaC02g41270D/BnaC03g02240D/BnaC03g26270D/BnaC03g44420D/BnaC04g23920D/BnaC04g30980D/BnaC04g34360D/BnaC04g34370D/BnaC06g…	45
biological_process	GO:0009938	negative regulation of gibberellic acid mediated signaling pathway	27/3317	29/76374	5.59986e-35	8.75979e-33	4.25253e-33	BnaA01g01350D/BnaA01g02030D/BnaA01g19680D/BnaA03g31770D/BnaA03g59180D/BnaA05g27510D/BnaA05g32630D/BnaA05g32640D/BnaA06g34810D/BnaA09g18700D/BnaA09g31700D/BnaA10g17240D/BnaC01g02360D/BnaC01g03170D/BnaC01g23660D/BnaC03g37230D/BnaC04g17250D/BnaC05g41670D/BnaC05g47760D/BnaC05g47770D/BnaC07g20900D/BnaC08g48470D/BnaC09g40420D/BnaC09g52270D/BnaCnng68300D/BnaCnng28010D/BnaCnng61180D	27
biological_process	GO:0010051	xylem and phloem pattern formation	71/3317	282/76374	7.70199e-34	1.05421e-31	5.11777e-32	BnaA01g00290D/BnaA01g01350D/BnaA01g04480D/BnaA01g19680D/BnaA02g03130D/BnaA02g16500D/BnaA02g26510D/BnaA03g01020D/BnaA03g06110D/BnaA03g23610D/BnaA03g52120D/BnaA03g54930D/BnaA03g59180D/BnaA04g07950D/BnaA04g19890D/BnaA05g09790D/BnaA06g11180D/BnaA06g21560D/BnaA06g34100D/BnaA07g25390D/BnaA08g12150D/BnaA08g15790D/BnaA08g17390D/BnaA09g13310D/BnaA09g19860D/BnaA09g26050D/BnaA09g26170D/BnaA09g31700D/BnaA10g…	71
biological_process	GO:0048439	flower morphogenesis	69/3317	292/76374	4.34753e-31	5.2895e-29	2.56784e-29	BnaA01g00290D/BnaA01g01350D/BnaA01g04480D/BnaA01g07810D/BnaA02g16500D/BnaA02g17280D/BnaA03g23610D/BnaA03g52120D/BnaA03g59180D/BnaA04g03040D/BnaA04g07950D/BnaA04g19890D/BnaA04g23860D/BnaA05g02160D/BnaA05g09790D/BnaA06g11180D/BnaA06g13970D/BnaA06g14040D/BnaA06g21560D/BnaA07g11660D/BnaA07g17180D/BnaA07g21650D/BnaA07g25390D/BnaA08g12150D/BnaA08g13510D/BnaA08g15790D/BnaA08g17390D/BnaA08g31250D/BnaA09g…	69
biological_process	GO:0010252	auxin homeostasis	42/3317	99/76374	6.83075e-31	7.47967e-29	3.63108e-29	BnaA01g01350D/BnaA01g19680D/BnaA02g02480D/BnaA03g06090D/BnaA03g59180D/BnaA05g10850D/BnaA05g11140D/BnaA07g08630D/BnaA08g05580D/BnaA08g27000D/BnaA08g28200D/BnaA09g27530D/BnaA09g31700D/BnaA09g50410D/BnaA10g03210D/BnaA10g09490D/BnaA10g17940D/BnaA10g19000D/BnaC01g02360D/BnaC01g23660D/BnaC03g07830D/BnaC04g12390D/BnaC04g12830D/BnaC05g03200D/BnaC05g03220D/BnaC08g09990D/BnaC08g12460D/BnaC08g36440D/BnaC08g…	42
biological_process	GO:0009944	polarity specification of adaxial/abaxial axis	74/3317	343/76374	1.76339e-30	1.75538e-28	8.52167e-29	BnaA01g00290D/BnaA01g01350D/BnaA02g03130D/BnaA02g16500D/BnaA03g01020D/BnaA03g06110D/BnaA03g21110D/BnaA03g23610D/BnaA03g54930D/BnaA03g59180D/BnaA04g03040D/BnaA04g23860D/BnaA05g02160D/BnaA05g16290D/BnaA06g11180D/BnaA06g14040D/BnaA07g09980D/BnaA07g11660D/BnaA07g17180D/BnaA07g27740D/BnaA07g38010D/BnaA08g15790D/BnaA08g31250D/BnaA09g24470D/BnaA09g26050D/BnaA09g31050D/BnaA09g36500D/BnaA10g09490D/BnaA10g…	74
biological_process	GO:0010582	floral meristem determinacy	36/3317	70/76374	1.94421e-30	1.7741e-28	8.61253e-29	BnaA02g35090D/BnaA02g35830D/BnaA03g07180D/BnaA03g43080D/BnaA04g03040D/BnaA04g12990D/BnaA04g23860D/BnaA05g02160D/BnaA06g39070D/BnaA07g17180D/BnaA07g24360D/BnaA07g27710D/BnaA07g27740D/BnaA09g36500D/BnaA09g42480D/BnaAnng23540D/BnaAnng26790D/BnaC02g08170D/BnaC02g38200D/BnaC03g09100D/BnaC04g01830D/BnaC04g24530D/BnaC04g35060D/BnaC04g47620D/BnaC06g25500D/BnaC06g29980D/BnaC07g34350D/BnaC08g28070D/BnaC08g…	36
biological_process	GO:0048441	petal development	43/3317	115/76374	7.43594e-29	6.26335e-27	3.04061e-27	BnaA01g09760D/BnaA02g27250D/BnaA02g35830D/BnaA03g05650D/BnaA03g43820D/BnaA04g01810D/BnaA04g04160D/BnaA05g02990D/BnaA05g03000D/BnaA06g39810D/BnaA07g13430D/BnaA07g18050D/BnaA07g19230D/BnaA07g24360D/BnaA07g27710D/BnaA07g27740D/BnaA09g19420D/BnaA09g55330D/BnaA10g18480D/BnaAnng31650D/BnaC01g11460D/BnaC02g35110D/BnaC03g07350D/BnaC03g62970D/BnaC04g16450D/BnaC04g23360D/BnaC04g26350D/BnaC04g52620D/BnaC06g…	43
biological_process	GO:0010359	regulation of anion channel activity	50/3317	163/76374	1.26722e-28	9.91151e-27	4.81164e-27	BnaA01g06830D/BnaA01g08690D/BnaA01g33550D/BnaA03g43360D/BnaA04g17070D/BnaA04g25720D/BnaA04g26180D/BnaA05g01140D/BnaA05g04000D/BnaA05g04020D/BnaA05g04850D/BnaA05g08700D/BnaA05g32890D/BnaA05g34020D/BnaA05g34490D/BnaA07g02600D/BnaA07g06100D/BnaA07g10480D/BnaA07g37370D/BnaA08g03680D/BnaA08g20830D/BnaAnng10890D/BnaAnng35060D/BnaAnng36480D/BnaAnng13510D/BnaAnng15660D/BnaC01g40050D/BnaC03g19350D/BnaC04g…	50
cellular_component	GO:0016459	myosin complex	33/3317	63/76374	2.2934e-28	1.64309e-26	7.97653e-27	BnaA01g08290D/BnaA02g04890D/BnaA02g09690D/BnaA03g35510D/BnaA03g56130D/BnaA05g15910D/BnaA05g19230D/BnaA06g02860D/BnaA06g05060D/BnaA08g26800D/BnaA09g15850D/BnaA09g44950D/BnaA10g07360D/BnaC01g09840D/BnaC02g44600D/BnaC03g10110D/BnaC03g41300D/BnaC05g06330D/BnaC05g32690D/BnaC05g32750D/BnaC05g50230D/BnaC06g03520D/BnaC06g03550D/BnaC08g07170D/BnaC08g37670D/BnaC08g37680D/BnaC09g16350D/BnaC09g30710D/BnaCnng…	33
biological_process	GO:0010093	specification of floral organ identity	50/3317	165/76374	2.40086e-28	1.64309e-26	7.97653e-27	BnaA01g28990D/BnaA01g34730D/BnaA02g13870D/BnaA02g35830D/BnaA03g05650D/BnaA03g21110D/BnaA03g33770D/BnaA03g53830D/BnaA04g04160D/BnaA05g02990D/BnaA05g03000D/BnaA05g16310D/BnaA06g07380D/BnaA07g24360D/BnaA07g27150D/BnaA07g27710D/BnaA07g27740D/BnaA07g38010D/BnaA08g24290D/BnaA09g13310D/BnaA10g18480D/BnaA10g20620D/BnaAnng40070D/BnaAnng25230D/BnaAnng31650D/BnaC01g01710D/BnaC01g36350D/BnaC02g04170D/BnaC02g…	50
biological_process	GO:0010154	fruit development	34/3317	68/76374	2.74755e-28	1.76974e-26	8.5914e-27	BnaA01g00730D/BnaA02g04890D/BnaA03g39820D/BnaA03g56130D/BnaA03g54930D/BnaA04g00510D/BnaA06g38770D/BnaA08g15580D/BnaA09g05500D/BnaA09g06580D/BnaA10g15000D/BnaA10g27410D/BnaAnng18520D/BnaAnng18530D/BnaAnng06660D/BnaAnng29380D/BnaC01g01720D/BnaC02g03640D/BnaC02g41870D/BnaC03g00520D/BnaC03g10110D/BnaC03g50910D/BnaC03g57650D/BnaC03g61610D/BnaC04g33800D/BnaC05g50230D/BnaC07g49790D/BnaC09g37370D/BnaCnng…	34
biological_process	GO:0009958	positive gravitropism	50/3317	166/76374	3.29162e-28	2.0024e-26	9.72088e-27	BnaA01g14030D/BnaA02g08340D/BnaA02g14990D/BnaA02g29470D/BnaA03g10430D/BnaA03g16880D/BnaA03g17600D/BnaA03g30920D/BnaA04g13440D/BnaA04g20290D/BnaA04g21150D/BnaA04g21830D/BnaA05g06540D/BnaA05g09150D/BnaA06g31250D/BnaA07g10150D/BnaA07g28990D/BnaA08g20690D/BnaA09g02390D/BnaA09g08440D/BnaA09g13180D/BnaA09g31180D/BnaA09g31200D/BnaA10g11110D/BnaAnng22030D/BnaAnng22040D/BnaC01g16530D/BnaC02g19980D/BnaC02g…	50
biological_process	GO:0000271	polysaccharide biosynthetic process	71/3317	357/76374	5.12934e-27	2.95612e-25	1.43508e-25	BnaA01g02640D/BnaA01g05490D/BnaA01g15170D/BnaA01g25880D/BnaA01g35050D/BnaA02g02680D/BnaA02g18200D/BnaA02g26940D/BnaA02g29470D/BnaA03g17600D/BnaA03g36950D/BnaA03g44500D/BnaA03g47710D/BnaA03g52870D/BnaA04g21830D/BnaA05g06540D/BnaA05g16680D/BnaA05g19350D/BnaA06g02910D/BnaA06g31250D/BnaA06g40640D/BnaA07g10150D/BnaA07g20880D/BnaA07g28990D/BnaA08g05350D/BnaA08g11150D/BnaA08g16520D/BnaA08g20690D/BnaA08g…	71
molecular_function	GO:0003774	motor activity	33/3317	68/76374	5.95111e-27	3.25823e-25	1.58174e-25	BnaA01g08290D/BnaA02g04890D/BnaA02g09690D/BnaA03g35510D/BnaA03g56130D/BnaA05g15910D/BnaA05g19230D/BnaA06g02860D/BnaA06g05060D/BnaA08g26800D/BnaA09g15850D/BnaA09g44950D/BnaA10g07360D/BnaC01g09840D/BnaC02g44600D/BnaC03g10110D/BnaC03g41300D/BnaC05g06330D/BnaC05g32690D/BnaC05g32750D/BnaC05g50230D/BnaC06g03520D/BnaC06g03550D/BnaC08g07170D/BnaC08g37670D/BnaC08g37680D/BnaC09g16350D/BnaC09g30710D/BnaCnng…	33
biological_process	GO:0009926	auxin polar transport	67/3317	332/76374	5.82466e-26	3.03715e-24	1.47441e-24	BnaA02g02480D/BnaA02g08340D/BnaA02g16500D/BnaA02g18200D/BnaA02g26940D/BnaA03g01690D/BnaA03g06090D/BnaA03g10430D/BnaA03g17600D/BnaA03g22900D/BnaA03g36950D/BnaA04g20290D/BnaA04g21830D/BnaA05g06540D/BnaA05g09150D/BnaA05g16680D/BnaA06g07360D/BnaA06g10340D/BnaA06g38620D/BnaA07g10150D/BnaA07g20880D/BnaA07g28990D/BnaA07g35600D/BnaA08g05350D/BnaA08g20690D/BnaA08g23780D/BnaA09g56670D/BnaA10g11110D/BnaA10g…	67
molecular_function	GO:0030599	pectinesterase activity	69/3317	367/76374	8.39734e-25	4.17959e-23	2.02902e-23	BnaA01g14010D/BnaA01g14640D/BnaA01g27440D/BnaA02g21340D/BnaA02g25490D/BnaA02g33370D/BnaA03g01580D/BnaA03g02030D/BnaA03g21590D/BnaA03g22940D/BnaA03g26250D/BnaA03g29100D/BnaA03g34410D/BnaA03g47250D/BnaA04g27250D/BnaA05g00810D/BnaA05g22940D/BnaA05g31600D/BnaA06g17500D/BnaA06g21790D/BnaA06g21800D/BnaA06g39970D/BnaA07g19220D/BnaA07g19230D/BnaA09g00690D/BnaA09g06030D/BnaA09g12730D/BnaA09g20980D/BnaA09g…	69
molecular_function	GO:0004601	peroxidase activity	63/3317	311/76374	1.355e-24	6.45098e-23	3.13169e-23	BnaA01g06830D/BnaA01g34030D/BnaA01g36520D/BnaA02g03720D/BnaA03g06740D/BnaA03g09760D/BnaA03g17800D/BnaA04g21990D/BnaA04g22000D/BnaA05g19460D/BnaA05g22930D/BnaA05g34020D/BnaA07g01880D/BnaA07g07020D/BnaA07g12740D/BnaA08g02580D/BnaA09g07380D/BnaA09g25570D/BnaA09g54380D/BnaA10g03290D/BnaAnng10890D/BnaAnng11270D/BnaAnng11280D/BnaAnng34820D/BnaAnng36480D/BnaAnng36520D/BnaAnng36530D/BnaAnng16310D/BnaAnng…	63
biological_process	GO:0010315	auxin efflux	34/3317	84/76374	1.80195e-24	8.22139e-23	3.99116e-23	BnaA02g02480D/BnaA02g08340D/BnaA02g29270D/BnaA02g29470D/BnaA03g10430D/BnaA03g16880D/BnaA04g21150D/BnaA04g26870D/BnaA06g31250D/BnaA06g31620D/BnaA07g10150D/BnaA07g28990D/BnaA08g20690D/BnaA09g02390D/BnaA10g11110D/BnaA10g19000D/BnaC02g20430D/BnaC02g37330D/BnaC02g37560D/BnaC03g13120D/BnaC03g20400D/BnaC04g00490D/BnaC04g51510D/BnaC06g24400D/BnaC06g43740D/BnaC07g13310D/BnaC07g25030D/BnaC08g06140D/BnaC09g…	34
biological_process	GO:0048440	carpel development	61/3317	297/76374	3.41616e-24	1.49628e-22	7.26383e-23	BnaA01g00730D/BnaA01g28990D/BnaA02g13870D/BnaA02g27250D/BnaA02g29270D/BnaA02g29470D/BnaA03g03090D/BnaA03g03100D/BnaA03g16880D/BnaA03g33770D/BnaA04g21150D/BnaA05g08700D/BnaA05g16310D/BnaA06g07380D/BnaA06g18830D/BnaA06g31250D/BnaA06g31620D/BnaA06g39810D/BnaA07g27150D/BnaA08g15580D/BnaA08g16660D/BnaA08g24290D/BnaA08g25130D/BnaA09g02390D/BnaA09g19420D/BnaA10g20620D/BnaA10g21570D/BnaAnng15660D/BnaAnng…	61
molecular_function	GO:0003680	AT DNA binding	17/3317	17/76374	6.6917e-24	2.81823e-22	1.36814e-22	BnaA02g18130D/BnaA04g26180D/BnaA05g04850D/BnaA05g08700D/BnaA06g14760D/BnaA07g11200D/BnaA08g21560D/BnaAnng15660D/BnaC02g24120D/BnaC03g19350D/BnaC04g04190D/BnaC04g09840D/BnaC04g50180D/BnaC05g16200D/BnaC07g15080D/BnaC08g19580D/BnaCnng77890D	17
biological_process	GO:0043086	negative regulation of catalytic activity	75/3317	446/76374	1.03839e-23	4.21126e-22	2.0444e-22	BnaA01g08290D/BnaA01g14010D/BnaA01g14640D/BnaA02g21340D/BnaA02g33370D/BnaA02g35040D/BnaA03g01580D/BnaA03g15730D/BnaA03g22940D/BnaA03g26250D/BnaA03g29100D/BnaA03g35510D/BnaA03g47250D/BnaA03g60380D/BnaA04g27250D/BnaA05g15910D/BnaA05g19230D/BnaA05g31600D/BnaA05g33390D/BnaA06g02860D/BnaA06g17500D/BnaA06g21790D/BnaA06g21800D/BnaA07g04390D/BnaA07g19220D/BnaA07g19230D/BnaA07g25700D/BnaA09g00690D/BnaA09g…	75
biological_process	GO:0010076	maintenance of floral meristem identity	21/3317	28/76374	2.05549e-23	7.76125e-22	3.76778e-22	BnaA02g27250D/BnaA02g35830D/BnaA03g54930D/BnaA04g12990D/BnaA06g39810D/BnaA07g24360D/BnaA07g27710D/BnaA09g19420D/BnaA09g42480D/BnaA10g27410D/BnaAnng29380D/BnaC02g03640D/BnaC02g35110D/BnaC03g00520D/BnaC04g35060D/BnaC06g25500D/BnaC06g29980D/BnaC07g22490D/BnaC08g34920D/BnaC09g22090D/BnaCnng03740D	21
biological_process	GO:0045962	positive regulation of development, heterochronic	21/3317	28/76374	2.05549e-23	7.76125e-22	3.76778e-22	BnaA01g09160D/BnaA01g29050D/BnaA03g27750D/BnaA03g33680D/BnaA03g39870D/BnaA03g58260D/BnaA05g11640D/BnaA05g11650D/BnaA05g24520D/BnaAnng16870D/BnaAnng27820D/BnaC01g36430D/BnaC01g40850D/BnaC02g41900D/BnaC03g32790D/BnaC03g38850D/BnaC04g13290D/BnaC05g48480D/BnaC07g35270D/BnaC07g49840D/BnaCnng59700D	21
biological_process	GO:0006826	iron ion transport	79/3317	498/76374	3.07176e-23	1.12119e-21	5.44295e-22	BnaA01g06830D/BnaA01g23840D/BnaA01g34030D/BnaA02g00610D/BnaA02g03720D/BnaA02g15390D/BnaA02g27720D/BnaA03g06740D/BnaA03g30890D/BnaA03g51820D/BnaA04g20400D/BnaA05g34020D/BnaA06g33220D/BnaA06g34860D/BnaA06g38070D/BnaA07g02600D/BnaA07g06530D/BnaA07g07190D/BnaA07g10480D/BnaA07g29450D/BnaA07g37370D/BnaA08g20830D/BnaA08g26680D/BnaA09g19850D/BnaA09g21040D/BnaA09g46860D/BnaA09g48550D/BnaA09g48600D/BnaA10g…	79
biological_process	GO:0009932	cell tip growth	71/3317	413/76374	4.24964e-23	1.50108e-21	7.28716e-22	BnaA01g02640D/BnaA01g05490D/BnaA01g15170D/BnaA01g25880D/BnaA01g35050D/BnaA02g02680D/BnaA02g18200D/BnaA02g26940D/BnaA02g29470D/BnaA03g17600D/BnaA03g36950D/BnaA03g44500D/BnaA03g47710D/BnaA03g52870D/BnaA04g21830D/BnaA05g06540D/BnaA05g16680D/BnaA05g19350D/BnaA06g02910D/BnaA06g31250D/BnaA06g40640D/BnaA07g10150D/BnaA07g20880D/BnaA07g28990D/BnaA08g05350D/BnaA08g11150D/BnaA08g16520D/BnaA08g20690D/BnaA08g…	71
biological_process	GO:0010500	transmitting tissue development	18/3317	20/76374	5.05424e-23	1.7295e-21	8.39603e-22	BnaA01g21210D/BnaA02g00140D/BnaA04g02270D/BnaA07g12160D/BnaA07g17440D/BnaA09g07590D/BnaA09g36970D/BnaAnng19120D/BnaAnng03680D/BnaC01g26610D/BnaC02g16560D/BnaC06g42710D/BnaC07g16340D/BnaC08g21730D/BnaC08g28680D/BnaC09g07530D/BnaC09g46950D/BnaCnng45350D	18
molecular_function	GO:0010329	auxin efflux transmembrane transporter activity	31/3317	76/76374	1.45939e-22	4.84251e-21	2.35085e-21	BnaA02g08340D/BnaA02g29270D/BnaA02g29470D/BnaA03g10430D/BnaA03g16880D/BnaA04g21150D/BnaA04g26870D/BnaA06g31250D/BnaA06g31620D/BnaA07g10150D/BnaA07g28990D/BnaA08g20690D/BnaA09g02390D/BnaA10g11110D/BnaC02g20430D/BnaC02g37330D/BnaC02g37560D/BnaC02g37570D/BnaC03g13120D/BnaC03g20400D/BnaC04g00490D/BnaC04g51510D/BnaC06g24400D/BnaC06g43740D/BnaC07g13310D/BnaC07g25030D/BnaC08g06140D/BnaC09g01920D/BnaC09g…	31
biological_process	GO:0010160	formation of animal organ boundary	16/3317	16/76374	1.54791e-22	4.98518e-21	2.4201e-21	BnaA01g28990D/BnaA02g09970D/BnaA02g29470D/BnaA03g33770D/BnaA06g31250D/BnaA09g02390D/BnaC01g36350D/BnaC02g13890D/BnaC02g37560D/BnaC02g37570D/BnaC03g38960D/BnaC04g34520D/BnaC05g38460D/BnaC07g48230D/BnaC09g01920D/BnaCnng45670D	16
biological_process	GO:0010073	meristem maintenance	51/3317	233/76374	9.01228e-22	2.81956e-20	1.36878e-20	BnaA01g03890D/BnaA01g03950D/BnaA01g16650D/BnaA01g34730D/BnaA02g16500D/BnaA03g48800D/BnaA03g52290D/BnaA03g53830D/BnaA04g04120D/BnaA04g05150D/BnaA05g07920D/BnaA05g07950D/BnaA06g12580D/BnaA06g14040D/BnaA07g11660D/BnaA07g15820D/BnaA08g17390D/BnaA08g20500D/BnaA08g20510D/BnaA08g22640D/BnaA08g31250D/BnaA09g26170D/BnaA09g29580D/BnaA09g31100D/BnaA09g33260D/BnaA09g34300D/BnaAnng30720D/BnaC01g01710D/BnaC01g…	51
biological_process	GO:0048653	anther development	54/3317	261/76374	9.54011e-22	2.90178e-20	1.4087e-20	BnaA01g16350D/BnaA01g25880D/BnaA01g35050D/BnaA02g13870D/BnaA03g01100D/BnaA03g01110D/BnaA03g13580D/BnaA03g27200D/BnaA03g44500D/BnaA03g58770D/BnaA05g08700D/BnaA05g16310D/BnaA05g19350D/BnaA06g02910D/BnaA06g07380D/BnaA06g38770D/BnaA07g04390D/BnaA07g16540D/BnaA07g27150D/BnaA08g24290D/BnaA08g30450D/BnaA08g30460D/BnaA09g06580D/BnaA09g34730D/BnaAnng15660D/BnaAnng00840D/BnaC01g19500D/BnaC01g33070D/BnaC02g…	54
molecular_function	GO:0009672	auxin:proton symporter activity	25/3317	50/76374	3.54547e-21	1.04927e-19	5.09377e-20	BnaA02g02480D/BnaA02g08340D/BnaA02g26940D/BnaA03g06090D/BnaA03g10430D/BnaA07g10150D/BnaA07g28990D/BnaA08g20690D/BnaA10g11110D/BnaA10g17940D/BnaA10g19000D/BnaC02g20430D/BnaC02g47640D/BnaC03g07830D/BnaC03g13120D/BnaC06g24400D/BnaC06g43740D/BnaC07g13310D/BnaC08g06140D/BnaC09g42610D/BnaC09g53450D/BnaCnng42600D/BnaCnng51580D/BnaCnng54140D/BnaCnng64920D	25
biological_process	GO:0048507	meristem development	41/3317	155/76374	4.7845e-21	1.37869e-19	6.693e-20	BnaA01g04480D/BnaA01g09760D/BnaA02g13870D/BnaA03g05650D/BnaA03g43820D/BnaA03g52120D/BnaA04g01810D/BnaA04g03960D/BnaA04g03970D/BnaA04g04160D/BnaA04g07950D/BnaA07g18050D/BnaA07g25390D/BnaA07g27150D/BnaA08g12150D/BnaA09g34520D/BnaA09g55330D/BnaA10g18480D/BnaAnng31650D/BnaC01g05930D/BnaC01g11460D/BnaC02g18270D/BnaC03g07350D/BnaC03g62970D/BnaC03g67130D/BnaC04g23360D/BnaC04g26350D/BnaC04g27750D/BnaC06g…	41
biological_process	GO:0010158	abaxial cell fate specification	22/3317	38/76374	1.14017e-20	3.08278e-19	1.49657e-19	BnaA02g03130D/BnaA02g13870D/BnaA03g06110D/BnaA03g21110D/BnaA04g19890D/BnaA05g09790D/BnaA07g27150D/BnaA07g38010D/BnaA10g17920D/BnaAnng40070D/BnaAnng18520D/BnaAnng18530D/BnaC02g06680D/BnaC02g18270D/BnaC03g07850D/BnaC03g25170D/BnaC04g50150D/BnaC06g16230D/BnaC06g30050D/BnaC09g32160D/BnaCnng05140D/BnaCnng54120D	22
biological_process	GO:0048366	leaf development	60/3317	335/76374	1.15346e-20	3.08278e-19	1.49657e-19	BnaA01g05490D/BnaA01g09760D/BnaA02g05070D/BnaA02g20420D/BnaA03g12070D/BnaA03g21550D/BnaA03g41590D/BnaA03g43820D/BnaA03g57030D/BnaA04g05130D/BnaA04g26820D/BnaA05g01030D/BnaA06g10340D/BnaA06g16550D/BnaA06g40640D/BnaA06g38620D/BnaA07g15850D/BnaA07g35600D/BnaA08g15740D/BnaA08g16520D/BnaA08g23780D/BnaA09g03240D/BnaA09g32520D/BnaA09g33270D/BnaA09g56670D/BnaA10g00810D/BnaA10g14760D/BnaAnng17880D/BnaAnng…	60
biological_process	GO:0009825	multidimensional cell growth	73/3317	477/76374	1.15428e-20	3.08278e-19	1.49657e-19	BnaA01g02640D/BnaA01g05490D/BnaA01g15170D/BnaA01g25880D/BnaA01g35050D/BnaA02g02680D/BnaA02g18200D/BnaA02g26940D/BnaA02g29470D/BnaA03g17600D/BnaA03g36950D/BnaA03g44500D/BnaA03g47710D/BnaA03g52870D/BnaA04g21830D/BnaA05g06540D/BnaA05g16680D/BnaA05g19350D/BnaA06g02910D/BnaA06g17970D/BnaA06g31250D/BnaA06g40640D/BnaA07g10150D/BnaA07g20880D/BnaA07g28990D/BnaA08g05350D/BnaA08g11150D/BnaA08g16520D/BnaA08g…	73
biological_process	GO:0008361	regulation of cell size	51/3317	253/76374	4.22394e-20	1.10124e-18	5.34609e-19	BnaA02g08340D/BnaA02g16500D/BnaA02g26940D/BnaA02g29470D/BnaA03g10430D/BnaA03g16880D/BnaA03g17600D/BnaA03g36950D/BnaA03g56900D/BnaA04g20290D/BnaA04g21150D/BnaA04g21830D/BnaA05g05020D/BnaA05g06540D/BnaA05g09150D/BnaA05g16680D/BnaA06g07360D/BnaA06g31250D/BnaA07g10150D/BnaA07g28990D/BnaA08g05350D/BnaA08g20690D/BnaA09g02390D/BnaA10g11110D/BnaC01g43640D/BnaC02g20430D/BnaC02g22310D/BnaC02g37560D/BnaC02g…	51
biological_process	GO:2000377	regulation of reactive oxygen species metabolic process	23/3317	46/76374	1.35442e-19	3.44905e-18	1.67437e-18	BnaA03g31770D/BnaA05g27510D/BnaA05g32630D/BnaA05g32640D/BnaA06g34810D/BnaA08g06940D/BnaA09g18700D/BnaA10g17240D/BnaC03g37230D/BnaC04g17250D/BnaC05g24350D/BnaC05g28860D/BnaC05g41670D/BnaC05g47760D/BnaC05g47770D/BnaC07g20900D/BnaC09g40420D/BnaC09g52270D/BnaCnng68300D/BnaCnng28010D/BnaCnng35930D/BnaCnng35940D/BnaCnng53220D	23
molecular_function	GO:0010328	auxin influx transmembrane transporter activity	18/3317	27/76374	9.30675e-19	2.31611e-17	1.12438e-17	BnaA02g18200D/BnaA03g16880D/BnaA03g17600D/BnaA04g21150D/BnaA04g21830D/BnaA04g26870D/BnaA05g06540D/BnaA07g20880D/BnaA10g27610D/BnaC03g20400D/BnaC03g21070D/BnaC04g00490D/BnaC04g07210D/BnaC04g45700D/BnaC04g51510D/BnaC06g20740D/BnaCnng03900D/BnaCnng11320D	18
molecular_function	GO:0009678	pyrophosphate hydrolysis-driven proton transmembrane transporter activity	19/3317	31/76374	1.06682e-18	2.59593e-17	1.26022e-17	BnaA04g12160D/BnaA06g10340D/BnaA06g38620D/BnaA07g35600D/BnaA08g23780D/BnaA09g43200D/BnaA09g56670D/BnaC02g14820D/BnaC04g33510D/BnaC04g35070D/BnaC05g11930D/BnaC06g39260D/BnaC06g40530D/BnaC07g29900D/BnaC08g16730D/BnaC08g35720D/BnaC08g38730D/BnaCnng75420D/BnaCnng37770D	19
biological_process	GO:0016246	RNA interference	41/3317	178/76374	1.18338e-18	2.81695e-17	1.36752e-17	BnaA01g00290D/BnaA01g04940D/BnaA01g04960D/BnaA03g31770D/BnaA03g51810D/BnaA04g04150D/BnaA04g05150D/BnaA05g07920D/BnaA05g07950D/BnaA05g27510D/BnaA06g14040D/BnaA07g11660D/BnaA07g15820D/BnaA07g16360D/BnaA08g15790D/BnaA08g31250D/BnaA09g33260D/BnaA09g55820D/BnaA10g16340D/BnaAnng08460D/BnaC01g01290D/BnaC01g06510D/BnaC01g06530D/BnaC02g08260D/BnaC03g37230D/BnaC03g55610D/BnaC03g61270D/BnaC04g08950D/BnaC04g…	41
molecular_function	GO:0008047	enzyme activator activity	25/3317	61/76374	1.54977e-18	3.61063e-17	1.75282e-17	BnaA01g08290D/BnaA02g35040D/BnaA03g09840D/BnaA03g35510D/BnaA05g15910D/BnaA05g19230D/BnaA05g33390D/BnaA06g02860D/BnaA07g04200D/BnaA07g33040D/BnaA10g12020D/BnaAnng12670D/BnaC01g09840D/BnaC01g25910D/BnaC02g06570D/BnaC03g12470D/BnaC03g41300D/BnaC05g32690D/BnaC05g32750D/BnaC06g03520D/BnaC06g37580D/BnaC09g33710D/BnaCnng25790D/BnaCnng73730D/BnaCnng05900D	25
biological_process	GO:0010254	nectary development	13/3317	13/76374	1.91257e-18	4.27401e-17	2.07486e-17	BnaA04g03040D/BnaA04g23860D/BnaA05g02160D/BnaA07g17180D/BnaA07g27740D/BnaA09g36500D/BnaC02g38200D/BnaC04g01830D/BnaC04g24530D/BnaC04g47620D/BnaC08g28070D/BnaCnng07590D/BnaCnng61410D	13
biological_process	GO:0048462	carpel formation	13/3317	13/76374	1.91257e-18	4.27401e-17	2.07486e-17	BnaA01g21210D/BnaA02g00140D/BnaA07g12160D/BnaA09g07590D/BnaAnng19120D/BnaAnng03680D/BnaC01g26610D/BnaC02g16560D/BnaC07g16340D/BnaC08g21730D/BnaC09g07530D/BnaC09g46950D/BnaCnng45350D	13
molecular_function	GO:0046910	pectinesterase inhibitor activity	38/3317	155/76374	2.19222e-18	4.80096e-17	2.33067e-17	BnaA01g14010D/BnaA01g14640D/BnaA02g21340D/BnaA02g33370D/BnaA03g22940D/BnaA03g26250D/BnaA03g47250D/BnaA04g27250D/BnaA06g17500D/BnaA06g21790D/BnaA06g21800D/BnaA07g19230D/BnaA09g00690D/BnaA09g06030D/BnaA09g12730D/BnaA09g20980D/BnaA09g39730D/BnaAnng37250D/BnaAnng18590D/BnaC01g16500D/BnaC01g17210D/BnaC02g28090D/BnaC02g46740D/BnaC03g27010D/BnaC03g31000D/BnaC03g51710D/BnaC03g51740D/BnaC04g19980D/BnaC06g…	38
biological_process	GO:0006109	regulation of carbohydrate metabolic process	21/3317	41/76374	2.70513e-18	5.80807e-17	2.81959e-17	BnaA01g07810D/BnaA01g08290D/BnaA02g35040D/BnaA03g35510D/BnaA05g15910D/BnaA05g19230D/BnaA05g33390D/BnaA06g02860D/BnaA08g13510D/BnaAnng12670D/BnaC01g09350D/BnaC01g09840D/BnaC02g06570D/BnaC03g41300D/BnaC05g32690D/BnaC05g32750D/BnaC06g03520D/BnaC08g13430D/BnaCnng25790D/BnaCnng73730D/BnaCnng05900D	21
molecular_function	GO:0004499	N,N-dimethylaniline monooxygenase activity	26/3317	70/76374	6.0385e-18	1.27157e-16	6.17297e-17	BnaA01g04490D/BnaA01g08170D/BnaA02g00930D/BnaA02g31890D/BnaA06g03430D/BnaA06g03450D/BnaA06g08330D/BnaA06g39380D/BnaA08g12160D/BnaA08g13610D/BnaA09g04510D/BnaA09g47340D/BnaAnng39990D/BnaAnng41850D/BnaC01g05950D/BnaC01g09750D/BnaC02g48550D/BnaC03g67260D/BnaC06g02330D/BnaC07g29140D/BnaC08g13170D/BnaC08g41500D/BnaC09g03930D/BnaC09g45330D/BnaCnng74730D/BnaCnng19720D	26
biological_process	GO:0022603	regulation of anatomical structure morphogenesis	14/3317	16/76374	9.14484e-18	1.85437e-16	9.00223e-17	BnaA01g04490D/BnaA02g00930D/BnaA06g03430D/BnaA06g03450D/BnaA08g12160D/BnaAnng37780D/BnaAnng30060D/BnaC01g05950D/BnaC03g67260D/BnaC06g02330D/BnaC06g40880D/BnaC09g45330D/BnaCnng74730D/BnaCnng19720D	14
biological_process	GO:0060919	auxin influx	14/3317	16/76374	9.14484e-18	1.85437e-16	9.00223e-17	BnaA02g18200D/BnaA03g17600D/BnaA04g21830D/BnaA04g26870D/BnaA05g06540D/BnaA07g20880D/BnaA10g27610D/BnaC03g21070D/BnaC04g00490D/BnaC04g07210D/BnaC04g45700D/BnaC04g51510D/BnaC06g20740D/BnaCnng03900D	14
molecular_function	GO:0004784	superoxide dismutase activity	18/3317	30/76374	1.51534e-17	3.01691e-16	1.46459e-16	BnaA01g14450D/BnaA01g31350D/BnaA03g13310D/BnaA03g47140D/BnaA05g28000D/BnaA05g28020D/BnaA06g26040D/BnaA09g05370D/BnaA09g35800D/BnaA10g05840D/BnaC01g17020D/BnaC02g42190D/BnaC03g16120D/BnaC05g42240D/BnaC07g39340D/BnaC08g27300D/BnaC09g04910D/BnaCnng69530D	18
biological_process	GO:0007018	microtubule-based movement	43/3317	209/76374	1.5658e-17	3.06169e-16	1.48633e-16	BnaA01g27720D/BnaA01g28250D/BnaA02g04460D/BnaA02g04470D/BnaA03g07740D/BnaA03g42230D/BnaA04g16530D/BnaA05g21080D/BnaA05g22780D/BnaA05g23190D/BnaA05g23610D/BnaA06g21560D/BnaA06g28420D/BnaA06g30600D/BnaA09g02780D/BnaA09g03980D/BnaA09g19860D/BnaA10g15400D/BnaA10g15410D/BnaAnng03370D/BnaAnng07930D/BnaAnng33030D/BnaC01g23900D/BnaC01g35240D/BnaC01g44240D/BnaC02g09000D/BnaC02g09010D/BnaC02g38250D/BnaC03g…	43
biological_process	GO:0009741	response to brassinosteroid	54/3317	323/76374	2.22528e-17	4.27487e-16	2.07528e-16	BnaA01g28670D/BnaA01g35580D/BnaA02g05070D/BnaA02g18750D/BnaA03g22940D/BnaA03g33930D/BnaA03g36950D/BnaA03g56310D/BnaA04g02120D/BnaA04g24480D/BnaA05g08700D/BnaA05g20080D/BnaA06g14040D/BnaA06g16550D/BnaA07g11660D/BnaA07g33970D/BnaA08g05350D/BnaA08g31250D/BnaA09g31290D/BnaA09g37320D/BnaA09g52740D/BnaA10g06310D/BnaA10g14760D/BnaAnng15660D/BnaAnng18590D/BnaC01g23810D/BnaC01g36030D/BnaC01g43640D/BnaC02g…	54
biological_process	GO:0009740	gibberellic acid mediated signaling pathway	51/3317	295/76374	4.00959e-17	7.56983e-16	3.67485e-16	BnaA01g07810D/BnaA01g08290D/BnaA02g12260D/BnaA02g32120D/BnaA02g35530D/BnaA03g35510D/BnaA05g08020D/BnaA05g15910D/BnaA05g19230D/BnaA06g02860D/BnaA06g10250D/BnaA06g27540D/BnaA06g27960D/BnaA06g39070D/BnaA07g12710D/BnaA07g34940D/BnaA08g13510D/BnaA09g04650D/BnaA09g28260D/BnaA09g35800D/BnaA09g40600D/BnaA09g57140D/BnaAnng41910D/BnaAnng07530D/BnaC01g09350D/BnaC01g09840D/BnaC02g40810D/BnaC03g41300D/BnaC04g…	51
molecular_function	GO:0008641	ubiquitin-like modifier activating enzyme activity	12/3317	12/76374	4.41899e-17	8.20135e-16	3.98143e-16	BnaA08g27000D/BnaA08g28200D/BnaA09g50410D/BnaA10g03210D/BnaC04g12390D/BnaC05g03200D/BnaC05g03220D/BnaC08g12460D/BnaC08g36440D/BnaC08g44060D/BnaC08g46380D/BnaC09g49220D	12
biological_process	GO:0009686	gibberellin biosynthetic process	44/3317	228/76374	8.33464e-17	1.52107e-15	7.3842e-16	BnaA01g07810D/BnaA01g08290D/BnaA02g11310D/BnaA02g35530D/BnaA03g35510D/BnaA05g08020D/BnaA05g15910D/BnaA05g19230D/BnaA05g32630D/BnaA05g32640D/BnaA06g02860D/BnaA06g10250D/BnaA06g27960D/BnaA07g34940D/BnaA08g13510D/BnaA09g28260D/BnaA09g35800D/BnaA09g57140D/BnaA10g17240D/BnaAnng41910D/BnaAnng07530D/BnaC01g09350D/BnaC01g09840D/BnaC02g15850D/BnaC03g41300D/BnaC04g09030D/BnaC05g11920D/BnaC05g32690D/BnaC05g…	44
molecular_function	GO:0042803	protein homodimerization activity	66/3317	483/76374	2.75748e-16	4.94991e-15	2.40298e-15	BnaA01g05490D/BnaA01g15900D/BnaA02g09460D/BnaA02g27980D/BnaA03g05360D/BnaA03g11710D/BnaA03g27070D/BnaA03g30810D/BnaA03g34390D/BnaA04g08710D/BnaA04g27890D/BnaA05g13730D/BnaA05g22950D/BnaA05g29140D/BnaA05g29150D/BnaA06g13600D/BnaA06g40640D/BnaA06g39070D/BnaA07g14490D/BnaA08g00420D/BnaA08g06920D/BnaA08g14300D/BnaA08g16520D/BnaA08g27870D/BnaA08g29730D/BnaA09g09630D/BnaA09g51860D/BnaA10g02550D/BnaA10g…	66
biological_process	GO:0007155	cell adhesion	59/3317	402/76374	3.8907e-16	6.87148e-15	3.33583e-15	BnaA01g04480D/BnaA01g27720D/BnaA02g26510D/BnaA02g35060D/BnaA03g07190D/BnaA03g16880D/BnaA03g17600D/BnaA03g42230D/BnaA03g52120D/BnaA04g21150D/BnaA04g21830D/BnaA05g06540D/BnaA05g23190D/BnaA06g14040D/BnaA06g17970D/BnaA06g18830D/BnaA06g27100D/BnaA06g34100D/BnaA07g11660D/BnaA07g34360D/BnaA08g12150D/BnaA08g31250D/BnaA09g04800D/BnaA09g26050D/BnaA10g16380D/BnaA10g20370D/BnaAnng27870D/BnaAnng33030D/BnaC01g…	59
biological_process	GO:0009736	cytokinin-activated signaling pathway	51/3317	316/76374	7.52371e-16	1.30769e-14	6.34832e-15	BnaA01g04940D/BnaA01g04960D/BnaA01g06830D/BnaA01g07220D/BnaA02g07870D/BnaA02g18750D/BnaA03g03090D/BnaA03g03100D/BnaA03g31770D/BnaA03g49640D/BnaA03g51810D/BnaA04g14760D/BnaA04g15110D/BnaA05g27510D/BnaA06g21560D/BnaA06g34500D/BnaA07g33970D/BnaA07g38280D/BnaA08g16660D/BnaA09g19860D/BnaA09g55820D/BnaA10g21570D/BnaAnng10890D/BnaAnng24980D/BnaC01g06510D/BnaC01g06530D/BnaC01g08790D/BnaC02g00180D/BnaC02g…	51
biological_process	GO:0042178	xenobiotic catabolic process	11/3317	11/76374	1.02071e-15	1.71951e-14	8.34752e-15	BnaA02g20270D/BnaA09g00210D/BnaA09g00220D/BnaA10g00520D/BnaAnng24330D/BnaAnng24340D/BnaC02g27750D/BnaC03g31760D/BnaC03g31770D/BnaC05g00580D/BnaCnng01870D	11
molecular_function	GO:0080118	brassinosteroid sulfotransferase activity	11/3317	11/76374	1.02071e-15	1.71951e-14	8.34752e-15	BnaA02g27290D/BnaA02g27300D/BnaA09g53480D/BnaA09g53490D/BnaAnng13870D/BnaC02g35150D/BnaC02g35160D/BnaC09g22120D/BnaC09g52480D/BnaC09g52360D/BnaCnng56120D	11
biological_process	GO:0030048	actin filament-based movement	53/3317	344/76374	1.53297e-15	2.54333e-14	1.23469e-14	BnaA01g08290D/BnaA01g27440D/BnaA02g04890D/BnaA02g09690D/BnaA03g16140D/BnaA03g34410D/BnaA03g35510D/BnaA03g56130D/BnaA05g08730D/BnaA05g15910D/BnaA05g19230D/BnaA05g22940D/BnaA06g02860D/BnaA06g05060D/BnaA07g34520D/BnaA08g26800D/BnaA09g15850D/BnaA09g44950D/BnaA10g07360D/BnaA10g15000D/BnaA10g20620D/BnaAnng25230D/BnaAnng33110D/BnaC01g09840D/BnaC01g34920D/BnaC02g04170D/BnaC02g44600D/BnaC03g10110D/BnaC03g…	53
biological_process	GO:0006479	protein methylation	17/3317	32/76374	2.02721e-15	3.31312e-14	1.60839e-14	BnaA03g32190D/BnaA03g35560D/BnaA03g51290D/BnaA05g19120D/BnaA05g25850D/BnaA05g26770D/BnaA08g12690D/BnaC01g07310D/BnaC01g10260D/BnaC01g14560D/BnaC01g32830D/BnaC03g37480D/BnaC03g41340D/BnaC03g66320D/BnaC03g77370D/BnaC05g32500D/BnaC05g40790D	17
biological_process	GO:0009808	lignin metabolic process	21/3317	54/76374	3.03008e-15	4.87932e-14	2.36872e-14	BnaA01g25880D/BnaA03g14000D/BnaA03g14010D/BnaA04g17560D/BnaA04g17570D/BnaA05g11950D/BnaA05g19350D/BnaA06g02910D/BnaA07g37370D/BnaAnng35060D/BnaC01g33070D/BnaC03g16950D/BnaC03g16960D/BnaC04g14330D/BnaC04g41120D/BnaC04g41130D/BnaC05g32840D/BnaC06g03410D/BnaC06g03450D/BnaC07g16620D/BnaC09g07880D	21
biological_process	GO:0009911	positive regulation of flower development	35/3317	163/76374	3.80254e-15	6.03447e-14	2.92949e-14	BnaA01g04490D/BnaA01g05490D/BnaA02g00930D/BnaA03g39820D/BnaA05g14370D/BnaA06g14090D/BnaA06g21460D/BnaA06g40640D/BnaA08g12160D/BnaA08g16520D/BnaA08g27870D/BnaA09g05500D/BnaA09g05840D/BnaA10g02550D/BnaAnng37780D/BnaAnng06660D/BnaC01g05950D/BnaC01g40650D/BnaC01g40660D/BnaC02g41870D/BnaC03g52090D/BnaC03g60590D/BnaC03g67260D/BnaC05g02520D/BnaC07g47240D/BnaC07g49790D/BnaC08g00670D/BnaC08g18060D/BnaC09g…	35
biological_process	GO:0010077	maintenance of inflorescence meristem identity	17/3317	33/76374	4.01077e-15	6.27399e-14	3.04577e-14	BnaA03g39820D/BnaA03g54930D/BnaA06g39070D/BnaA09g05500D/BnaA10g27410D/BnaAnng06660D/BnaAnng29380D/BnaC02g03640D/BnaC02g41870D/BnaC03g00520D/BnaC07g49790D/BnaCnng24550D/BnaCnng03740D/BnaCnng78420D/BnaCnng78500D/BnaCnng52780D/BnaCnng52790D	17
biological_process	GO:0010371	regulation of gibberellin biosynthetic process	11/3317	12/76374	1.17625e-14	1.81407e-13	8.80658e-14	BnaA01g03890D/BnaA01g03950D/BnaA03g52290D/BnaA09g47030D/BnaAnng36290D/BnaC01g05260D/BnaC01g05280D/BnaC01g05470D/BnaC08g15650D/BnaC08g41070D/BnaCnng31550D	11
biological_process	GO:0048766	root hair initiation	17/3317	35/76374	1.43526e-14	2.18279e-13	1.05966e-13	BnaA02g35540D/BnaA04g20290D/BnaA05g09150D/BnaA07g10150D/BnaA07g20890D/BnaA07g25860D/BnaA07g28990D/BnaA08g20690D/BnaC02g20430D/BnaC04g10560D/BnaC06g13020D/BnaC06g24400D/BnaC06g43500D/BnaC06g43740D/BnaC07g13310D/BnaC08g06140D/BnaCnng38450D	17
molecular_function	GO:0008276	protein methyltransferase activity	15/3317	26/76374	1.75486e-14	2.63229e-13	1.27787e-13	BnaA03g32190D/BnaA03g35560D/BnaA03g51290D/BnaA05g19120D/BnaA05g25850D/BnaA05g26770D/BnaA08g12690D/BnaC01g07310D/BnaC01g14560D/BnaC01g32830D/BnaC03g37480D/BnaC03g41340D/BnaC03g77370D/BnaC05g32500D/BnaC05g40790D	15
molecular_function	GO:0008398	sterol 14-demethylase activity	10/3317	10/76374	2.35699e-14	3.35182e-13	1.62718e-13	BnaA06g07270D/BnaA08g31650D/BnaAnng33870D/BnaAnng33880D/BnaC01g44720D/BnaC08g07160D/BnaCnng75820D/BnaCnng41000D/BnaCnng41010D/BnaCnng18080D	10
biological_process	GO:0010248	establishment or maintenance of transmembrane electrochemical gradient	10/3317	10/76374	2.35699e-14	3.35182e-13	1.62718e-13	BnaA06g10340D/BnaA06g38620D/BnaA07g35600D/BnaA08g23780D/BnaA09g56670D/BnaC05g11930D/BnaC06g39260D/BnaC06g40530D/BnaC08g16730D/BnaC08g38730D	10
molecular_function	GO:0016710	trans-cinnamate 4-monooxygenase activity	10/3317	10/76374	2.35699e-14	3.35182e-13	1.62718e-13	BnaA03g14000D/BnaA03g14010D/BnaA04g17560D/BnaA04g17570D/BnaA05g11950D/BnaC03g16950D/BnaC03g16960D/BnaC04g14330D/BnaC04g41120D/BnaC04g41130D	10
molecular_function	GO:0080097	L-tryptophan:pyruvate aminotransferase activity	10/3317	10/76374	2.35699e-14	3.35182e-13	1.62718e-13	BnaA01g14030D/BnaA02g14990D/BnaA09g31180D/BnaA09g31200D/BnaAnng22030D/BnaAnng22040D/BnaC01g16530D/BnaC02g19980D/BnaC05g18610D/BnaC06g43720D	10
biological_process	GO:0045010	actin nucleation	61/3317	470/76374	3.83262e-14	5.3804e-13	2.61197e-13	BnaA01g04480D/BnaA01g17490D/BnaA01g27720D/BnaA02g26510D/BnaA02g35060D/BnaA03g07190D/BnaA03g16880D/BnaA03g17600D/BnaA03g42230D/BnaA03g52120D/BnaA04g21150D/BnaA04g21830D/BnaA05g06540D/BnaA05g23190D/BnaA06g14040D/BnaA06g18830D/BnaA06g21560D/BnaA06g27100D/BnaA06g34100D/BnaA07g11660D/BnaA07g34360D/BnaA08g12150D/BnaA08g31250D/BnaA09g04800D/BnaA09g19860D/BnaA09g26050D/BnaA10g16380D/BnaA10g20370D/BnaAnng…	61
biological_process	GO:0010311	lateral root formation	35/3317	176/76374	4.38735e-14	6.0812e-13	2.95218e-13	BnaA01g23190D/BnaA02g05070D/BnaA02g18200D/BnaA03g01690D/BnaA03g17600D/BnaA04g00230D/BnaA04g02120D/BnaA04g21830D/BnaA04g24480D/BnaA05g06540D/BnaA07g05760D/BnaA07g19520D/BnaA07g20880D/BnaA09g37320D/BnaA09g40340D/BnaA10g14760D/BnaA10g24820D/BnaAnng27870D/BnaC03g02240D/BnaC03g21070D/BnaC04g04180D/BnaC04g07210D/BnaC04g23780D/BnaC04g45700D/BnaC04g48290D/BnaC04g56960D/BnaC06g20740D/BnaC06g43000D/BnaC08g…	35
biological_process	GO:0048527	lateral root development	52/3317	363/76374	5.67378e-14	7.76598e-13	3.77008e-13	BnaA01g08010D/BnaA01g28670D/BnaA01g28990D/BnaA02g15390D/BnaA02g29470D/BnaA03g30920D/BnaA03g33770D/BnaA03g33930D/BnaA03g51820D/BnaA03g59080D/BnaA05g34020D/BnaA06g14040D/BnaA06g31250D/BnaA06g38270D/BnaA07g11660D/BnaA07g29450D/BnaA08g24970D/BnaA08g31250D/BnaA08g30720D/BnaA09g02390D/BnaA09g47410D/BnaAnng36480D/BnaAnng28230D/BnaC01g09580D/BnaC01g36030D/BnaC01g36350D/BnaC02g20640D/BnaC02g37560D/BnaC02g…	52
biological_process	GO:0010588	cotyledon vascular tissue pattern formation	20/3317	55/76374	6.28269e-14	8.49326e-13	4.12314e-13	BnaA01g14030D/BnaA02g14990D/BnaA03g23150D/BnaA04g26850D/BnaA09g23810D/BnaA09g23820D/BnaA09g31180D/BnaA09g31200D/BnaA09g43460D/BnaAnng22030D/BnaAnng22040D/BnaAnng28100D/BnaAnng28110D/BnaC01g16530D/BnaC02g19980D/BnaC04g51520D/BnaC05g18610D/BnaC06g43720D/BnaC08g36050D/BnaCnng74340D	20
biological_process	GO:0009886	post-embryonic animal morphogenesis	15/3317	28/76374	7.82996e-14	1.04559e-12	5.07591e-13	BnaA01g09760D/BnaA03g43820D/BnaA04g01810D/BnaA07g18050D/BnaA09g55330D/BnaC01g11460D/BnaC03g62970D/BnaC04g23360D/BnaC06g16910D/BnaC06g27260D/BnaC07g35640D/BnaC08g29520D/BnaC08g29530D/BnaC09g10650D/BnaC09g24200D	15
biological_process	GO:0010054	trichoblast differentiation	23/3317	76/76374	7.93353e-14	1.04665e-12	5.08108e-13	BnaA02g35230D/BnaA03g01580D/BnaA03g47620D/BnaA07g07020D/BnaA09g07380D/BnaA09g25570D/BnaA10g03290D/BnaAnng11270D/BnaAnng11280D/BnaAnng16310D/BnaAnng05140D/BnaC02g16700D/BnaC03g01860D/BnaC05g03300D/BnaC07g08680D/BnaC08g09410D/BnaC08g09420D/BnaC08g44090D/BnaC08g44140D/BnaC09g07300D/BnaC09g32690D/BnaCnng59490D/BnaCnng11080D	23
cellular_component	GO:0010008	endosome membrane	14/3317	24/76374	1.07522e-13	1.40162e-12	6.80431e-13	BnaA06g10340D/BnaA06g33150D/BnaA06g38620D/BnaA07g35600D/BnaA08g23780D/BnaA09g19690D/BnaA09g56670D/BnaC05g11930D/BnaC06g39260D/BnaC06g40530D/BnaC07g23240D/BnaC08g16730D/BnaC08g38730D/BnaC09g21710D	14
biological_process	GO:0050982	detection of mechanical stimulus	13/3317	20/76374	1.11287e-13	1.43364e-12	6.95976e-13	BnaA02g04270D/BnaA03g07620D/BnaA03g07630D/BnaA10g15600D/BnaA10g15610D/BnaA10g29710D/BnaC02g08770D/BnaC02g08780D/BnaC03g09640D/BnaC03g09650D/BnaC03g27070D/BnaC03g27080D/BnaC09g38160D	13
biological_process	GO:0010223	secondary shoot formation	18/3317	45/76374	1.60822e-13	2.04767e-12	9.94064e-13	BnaA01g28990D/BnaA02g09970D/BnaA03g22900D/BnaA03g33770D/BnaA03g54930D/BnaA06g00290D/BnaA10g27410D/BnaAnng29380D/BnaC01g36350D/BnaC02g03640D/BnaC02g13890D/BnaC03g00520D/BnaC03g26960D/BnaC03g38960D/BnaC04g34520D/BnaC05g38460D/BnaC06g07300D/BnaCnng03740D	18
biological_process	GO:0010089	xylem development	48/3317	325/76374	1.6315e-13	2.05344e-12	9.96863e-13	BnaA01g00290D/BnaA02g16500D/BnaA02g28260D/BnaA02g36130D/BnaA03g13050D/BnaA04g04200D/BnaA04g07000D/BnaA04g13440D/BnaA05g01130D/BnaA05g01140D/BnaA05g21000D/BnaA07g20350D/BnaA07g34920D/BnaA07g38280D/BnaA08g05020D/BnaA08g15790D/BnaA08g17590D/BnaA09g12730D/BnaA09g26470D/BnaA10g07850D/BnaA10g25210D/BnaAnng20150D/BnaAnng27870D/BnaC01g01290D/BnaC02g15620D/BnaC02g22310D/BnaC02g36330D/BnaC03g15920D/BnaC03g…	48
biological_process	GO:0009851	auxin biosynthetic process	20/3317	58/76374	2.02684e-13	2.52203e-12	1.22435e-12	BnaA01g04490D/BnaA01g08170D/BnaA02g00930D/BnaA02g31890D/BnaA06g39380D/BnaA08g12160D/BnaA08g13610D/BnaA09g04510D/BnaAnng37780D/BnaAnng41850D/BnaC01g05950D/BnaC01g09750D/BnaC02g48550D/BnaC03g67260D/BnaC07g29140D/BnaC08g13170D/BnaC09g03930D/BnaC09g45330D/BnaCnng74730D/BnaCnng19720D	20
molecular_function	GO:0008381	mechanosensitive ion channel activity	13/3317	21/76374	2.80409e-13	3.44997e-12	1.67483e-12	BnaA02g04270D/BnaA03g07620D/BnaA03g07630D/BnaA10g15600D/BnaA10g15610D/BnaA10g29710D/BnaC02g08770D/BnaC02g08780D/BnaC03g09640D/BnaC03g09650D/BnaC03g27070D/BnaC03g27080D/BnaC09g38160D	13
molecular_function	GO:0047325	inositol tetrakisphosphate 1-kinase activity	11/3317	14/76374	3.29049e-13	3.95943e-12	1.92215e-12	BnaA01g03220D/BnaA03g06170D/BnaA03g38640D/BnaA03g50630D/BnaA10g17710D/BnaAnng34680D/BnaC01g04480D/BnaC03g07940D/BnaC03g66400D/BnaC09g41080D/BnaCnng47190D	11
molecular_function	GO:0052726	inositol-1,3,4-trisphosphate 5-kinase activity	11/3317	14/76374	3.29049e-13	3.95943e-12	1.92215e-12	BnaA01g03220D/BnaA03g06170D/BnaA03g38640D/BnaA03g50630D/BnaA10g17710D/BnaAnng34680D/BnaC01g04480D/BnaC03g07940D/BnaC03g66400D/BnaC09g41080D/BnaCnng47190D	11
biological_process	GO:0008285	negative regulation of cell population proliferation	14/3317	26/76374	4.87652e-13	5.80412e-12	2.81767e-12	BnaA01g03890D/BnaA01g03950D/BnaA03g52290D/BnaA05g14370D/BnaA06g14090D/BnaA06g21460D/BnaA09g05840D/BnaC01g05260D/BnaC01g05280D/BnaC01g05470D/BnaC03g52090D/BnaC08g18060D/BnaC09g05450D/BnaCnng54100D	14
biological_process	GO:0010325	raffinose family oligosaccharide biosynthetic process	16/3317	36/76374	4.93427e-13	5.80971e-12	2.82038e-12	BnaA01g13690D/BnaA05g32630D/BnaA05g32640D/BnaA06g34810D/BnaA09g18700D/BnaA09g28260D/BnaA10g17240D/BnaC01g16070D/BnaC04g17250D/BnaC05g47760D/BnaC05g47770D/BnaC07g20900D/BnaC09g40420D/BnaC09g52270D/BnaCnng68300D/BnaCnng28010D	16
biological_process	GO:0048480	stigma development	12/3317	18/76374	6.42419e-13	7.4835e-12	3.63294e-12	BnaA01g01350D/BnaA01g19680D/BnaA03g59180D/BnaA06g38770D/BnaA09g06580D/BnaA09g31700D/BnaC01g02360D/BnaC01g23660D/BnaC03g50910D/BnaC08g48470D/BnaCnng61180D/BnaCnng15860D	12
biological_process	GO:0009641	shade avoidance	22/3317	76/76374	7.53882e-13	8.68948e-12	4.2184e-12	BnaA01g14640D/BnaA02g14990D/BnaA02g17290D/BnaA03g43080D/BnaA03g47250D/BnaA07g21640D/BnaA09g31180D/BnaA09g31200D/BnaAnng22030D/BnaAnng22040D/BnaAnng23540D/BnaAnng09120D/BnaC01g17210D/BnaC02g19980D/BnaC02g23750D/BnaC05g18610D/BnaC06g22310D/BnaC06g36260D/BnaC06g43720D/BnaC07g34350D/BnaC07g39450D/BnaCnng68370D	22
biological_process	GO:0048444	floral organ morphogenesis	16/3317	37/76374	8.34099e-13	9.51394e-12	4.61864e-12	BnaA01g13690D/BnaA05g32630D/BnaA05g32640D/BnaA06g34810D/BnaA09g18700D/BnaA09g28260D/BnaA10g17240D/BnaC01g16070D/BnaC04g17250D/BnaC05g47760D/BnaC05g47770D/BnaC07g20900D/BnaC09g40420D/BnaC09g52270D/BnaCnng68300D/BnaCnng28010D	16
biological_process	GO:0010086	embryonic root morphogenesis	10/3317	12/76374	1.43556e-12	1.58781e-11	7.70821e-12	BnaA06g34500D/BnaA07g22200D/BnaA07g31610D/BnaAnng30830D/BnaC06g22930D/BnaC06g22940D/BnaC06g35430D/BnaC07g21210D/BnaC07g21250D/BnaC07g21260D	10
molecular_function	GO:0016274	protein-arginine N-methyltransferase activity	10/3317	12/76374	1.43556e-12	1.58781e-11	7.70821e-12	BnaA01g07340D/BnaA03g49570D/BnaA07g01100D/BnaA08g13390D/BnaC01g09010D/BnaC03g68330D/BnaC07g01550D/BnaC07g02260D/BnaC07g41980D/BnaC07g50720D	10
biological_process	GO:0048479	style development	10/3317	12/76374	1.43556e-12	1.58781e-11	7.70821e-12	BnaA01g01350D/BnaA01g19680D/BnaA03g59180D/BnaA07g27740D/BnaA09g31700D/BnaC01g02360D/BnaC01g23660D/BnaC08g48470D/BnaCnng61180D/BnaCnng61410D	10
biological_process	GO:0080119	ER body organization	13/3317	23/76374	1.4526e-12	1.59059e-11	7.7217e-12	BnaA03g30810D/BnaA05g23650D/BnaA05g29140D/BnaA05g29150D/BnaA08g06920D/BnaAnng27630D/BnaC01g35580D/BnaC01g35590D/BnaC03g36110D/BnaC05g37360D/BnaC05g43610D/BnaC05g43620D/BnaCnng39140D	13
biological_process	GO:0006879	cellular iron ion homeostasis	20/3317	65/76374	2.32016e-12	2.51542e-11	1.22114e-11	BnaA01g08290D/BnaA02g09690D/BnaA03g09840D/BnaA03g35510D/BnaA05g15910D/BnaA05g19230D/BnaA06g02860D/BnaA10g07360D/BnaA10g12020D/BnaC01g09840D/BnaC02g44600D/BnaC03g12470D/BnaC03g41300D/BnaC05g32690D/BnaC05g32750D/BnaC06g03520D/BnaC09g30710D/BnaC09g33710D/BnaCnng25790D/BnaCnng73730D	20
biological_process	GO:0030036	actin cytoskeleton organization	24/3317	97/76374	2.98602e-12	3.20558e-11	1.55618e-11	BnaA01g02640D/BnaA01g19850D/BnaA02g07080D/BnaA03g09510D/BnaA03g52870D/BnaA06g05060D/BnaA06g18020D/BnaA06g20460D/BnaA08g11150D/BnaA08g26800D/BnaA09g15850D/BnaA10g12390D/BnaC01g03880D/BnaC02g10000D/BnaC03g12030D/BnaC03g55960D/BnaC03g66050D/BnaC03g75050D/BnaC05g06330D/BnaC08g07170D/BnaC09g16350D/BnaC09g34680D/BnaCnng47820D/BnaUnng05330D	24
biological_process	GO:0048364	root development	51/3317	390/76374	3.3958e-12	3.58762e-11	1.74165e-11	BnaA02g08340D/BnaA02g16500D/BnaA03g03090D/BnaA03g03100D/BnaA03g04760D/BnaA03g09840D/BnaA03g10430D/BnaA03g18780D/BnaA03g56900D/BnaA04g03960D/BnaA04g03970D/BnaA04g26850D/BnaA05g05020D/BnaA05g05750D/BnaA05g11140D/BnaA08g16660D/BnaA09g12680D/BnaA09g34520D/BnaA10g02680D/BnaA10g11110D/BnaA10g12020D/BnaA10g19490D/BnaA10g21570D/BnaAnng02760D/BnaAnng12210D/BnaAnng24980D/BnaC01g09840D/BnaC02g00180D/BnaC02g…	51
molecular_function	GO:0005200	structural constituent of cytoskeleton	28/3317	133/76374	3.40742e-12	3.58762e-11	1.74165e-11	BnaA01g19850D/BnaA02g04460D/BnaA02g04470D/BnaA02g07080D/BnaA03g07730D/BnaA03g07740D/BnaA03g09510D/BnaA06g12580D/BnaA06g18020D/BnaA06g20460D/BnaA08g22640D/BnaA10g12390D/BnaA10g15400D/BnaA10g15410D/BnaC02g09000D/BnaC02g09010D/BnaC02g10000D/BnaC03g09730D/BnaC03g09740D/BnaC03g12030D/BnaC03g55960D/BnaC03g71020D/BnaC03g75050D/BnaC05g14140D/BnaC08g17980D/BnaC09g34680D/BnaC09g37880D/BnaC09g37930D	28
biological_process	GO:0080184	response to phenylpropanoid	11/3317	16/76374	3.64169e-12	3.79777e-11	1.84366e-11	BnaA01g31900D/BnaA06g34860D/BnaAnng32670D/BnaAnng32860D/BnaC01g38730D/BnaC03g62100D/BnaC03g76760D/BnaC07g48800D/BnaC09g52200D/BnaCnng51700D/BnaCnng53390D	11
biological_process	GO:0010043	response to zinc ion	48/3317	356/76374	4.80456e-12	4.9632e-11	2.40944e-11	BnaA01g03390D/BnaA01g31350D/BnaA01g31900D/BnaA03g17800D/BnaA03g59080D/BnaA04g21990D/BnaA04g22000D/BnaA05g28000D/BnaA05g28020D/BnaA06g13050D/BnaA06g34860D/BnaA06g38480D/BnaA08g11580D/BnaA08g22350D/BnaA08g30720D/BnaA09g21030D/BnaA09g21040D/BnaA09g35800D/BnaA09g44440D/BnaA09g54380D/BnaAnng34820D/BnaAnng32670D/BnaAnng32690D/BnaAnng32860D/BnaC01g04670D/BnaC01g35300D/BnaC01g38730D/BnaC03g39640D/BnaC03g…	48
cellular_component	GO:0005874	microtubule	44/3317	308/76374	5.15432e-12	5.27474e-11	2.56068e-11	BnaA01g27720D/BnaA01g28250D/BnaA02g04460D/BnaA02g04470D/BnaA03g07730D/BnaA03g07740D/BnaA03g42230D/BnaA04g16530D/BnaA05g21080D/BnaA05g22780D/BnaA05g23190D/BnaA05g23610D/BnaA06g28420D/BnaA06g30600D/BnaA09g02780D/BnaA09g03980D/BnaA10g15400D/BnaA10g15410D/BnaAnng03370D/BnaAnng07930D/BnaAnng33030D/BnaC01g23900D/BnaC01g35240D/BnaC01g44240D/BnaC02g09000D/BnaC02g09010D/BnaC02g38250D/BnaC03g09730D/BnaC03g…	44
biological_process	GO:0006367	transcription initiation from RNA polymerase II promoter	17/3317	47/76374	5.26648e-12	5.33962e-11	2.59217e-11	BnaA03g55450D/BnaA03g55460D/BnaA05g13730D/BnaA05g25850D/BnaA08g00420D/BnaA08g28950D/BnaA09g49410D/BnaA10g04870D/BnaAnng01780D/BnaC02g01920D/BnaC03g02660D/BnaC03g02670D/BnaC03g70590D/BnaC05g39930D/BnaC06g10970D/BnaC08g02230D/BnaC08g45360D	17
biological_process	GO:0009749	response to glucose	50/3317	383/76374	5.85905e-12	5.88593e-11	2.85738e-11	BnaA01g36150D/BnaA02g04270D/BnaA02g08340D/BnaA02g11520D/BnaA03g07620D/BnaA03g07630D/BnaA03g10430D/BnaA03g13490D/BnaA03g16100D/BnaA05g08820D/BnaA06g09870D/BnaA06g09880D/BnaA06g33150D/BnaA06g34500D/BnaA08g31540D/BnaA09g19690D/BnaA09g40600D/BnaA09g55010D/BnaA10g05930D/BnaA10g11110D/BnaA10g15600D/BnaA10g15610D/BnaA10g29710D/BnaAnng15720D/BnaC02g08770D/BnaC02g08780D/BnaC02g16000D/BnaC03g09640D/BnaC03g…	50
biological_process	GO:0048829	root cap development	20/3317	68/76374	5.93029e-12	5.90333e-11	2.86583e-11	BnaA02g18200D/BnaA03g17600D/BnaA03g23150D/BnaA04g21830D/BnaA05g06540D/BnaA07g20880D/BnaA09g23810D/BnaA09g23820D/BnaA09g43460D/BnaA10g27610D/BnaAnng28100D/BnaAnng28110D/BnaC03g21070D/BnaC04g07210D/BnaC04g45700D/BnaC06g20740D/BnaC08g36050D/BnaCnng74340D/BnaCnng03900D/BnaCnng11320D	20
molecular_function	GO:0008429	phosphatidylethanolamine binding	13/3317	25/76374	6.08392e-12	6.00171e-11	2.91359e-11	BnaA03g22340D/BnaA04g15930D/BnaA07g13290D/BnaA10g26300D/BnaAnng00810D/BnaC01g41050D/BnaC02g02900D/BnaC03g01440D/BnaC03g47080D/BnaC03g64560D/BnaC04g16750D/BnaC04g39220D/BnaCnng10680D	13
cellular_component	GO:0009330	DNA topoisomerase type II (double strand cut, ATP-hydrolyzing) complex	12/3317	21/76374	9.00246e-12	8.72362e-11	4.23497e-11	BnaA01g07750D/BnaA03g55060D/BnaA03g55070D/BnaA05g28510D/BnaA06g27100D/BnaA09g04800D/BnaA10g26080D/BnaAnng17740D/BnaC03g01570D/BnaC05g42830D/BnaC07g29850D/BnaCnng10360D	12
biological_process	GO:0071258	cellular response to gravity	12/3317	21/76374	9.00246e-12	8.72362e-11	4.23497e-11	BnaA02g04460D/BnaA02g04470D/BnaA03g07740D/BnaA10g15400D/BnaA10g15410D/BnaAnng22100D/BnaC02g09000D/BnaC02g09010D/BnaC03g09730D/BnaC03g09740D/BnaC09g37880D/BnaC09g37930D	12
biological_process	GO:0046621	negative regulation of organ growth	10/3317	14/76374	2.00934e-11	1.93003e-10	9.36951e-11	BnaA03g01020D/BnaA06g13370D/BnaA08g22120D/BnaA10g26420D/BnaAnng00750D/BnaC02g02980D/BnaC03g01370D/BnaC05g14930D/BnaC08g18690D/BnaCnng02650D	10
biological_process	GO:0035246	peptidyl-arginine N-methylation	9/3317	11/76374	2.76386e-11	2.63167e-10	1.27757e-10	BnaA01g07340D/BnaA03g49570D/BnaA07g01100D/BnaA08g13390D/BnaC01g09010D/BnaC07g01550D/BnaC07g02260D/BnaC07g41980D/BnaC07g50720D	9
biological_process	GO:0006325	chromatin organization	18/3317	60/76374	4.64342e-11	4.38323e-10	2.12788e-10	BnaA01g09280D/BnaA02g18130D/BnaA03g34390D/BnaA05g22950D/BnaA06g14760D/BnaA06g27100D/BnaA07g11200D/BnaA08g21560D/BnaA09g04800D/BnaA10g24970D/BnaC02g24120D/BnaC03g39830D/BnaC05g16200D/BnaC05g36390D/BnaC07g15080D/BnaC07g29850D/BnaC08g19580D/BnaC09g49900D	18
biological_process	GO:0010102	lateral root morphogenesis	19/3317	68/76374	5.40242e-11	5.05611e-10	2.45454e-10	BnaA02g35090D/BnaA03g07180D/BnaA03g36950D/BnaA05g16680D/BnaA08g05350D/BnaA08g06940D/BnaAnng26790D/BnaC01g43640D/BnaC02g08170D/BnaC03g09100D/BnaC05g24350D/BnaC05g28860D/BnaC05g29300D/BnaC07g16810D/BnaC08g47390D/BnaC09g39250D/BnaCnng35930D/BnaCnng35940D/BnaCnng53220D	19
molecular_function	GO:0004647	phosphoserine phosphatase activity	11/3317	19/76374	5.58175e-11	5.13615e-10	2.4934e-10	BnaA01g11500D/BnaA02g24710D/BnaA03g44810D/BnaA08g09620D/BnaA10g26070D/BnaAnng00920D/BnaC02g02760D/BnaC02g32750D/BnaC03g64030D/BnaC07g36800D/BnaCnng10350D	11
biological_process	GO:0010434	bract formation	11/3317	19/76374	5.58175e-11	5.13615e-10	2.4934e-10	BnaA04g03040D/BnaA04g23860D/BnaA05g02160D/BnaA07g17180D/BnaA09g36500D/BnaC02g38200D/BnaC04g01830D/BnaC04g24530D/BnaC04g47620D/BnaC08g28070D/BnaCnng07590D	11
biological_process	GO:0090436	leaf pavement cell development	10/3317	15/76374	5.79102e-11	5.28431e-10	2.56532e-10	BnaA02g04890D/BnaA03g56130D/BnaA09g44950D/BnaA10g15000D/BnaC03g10110D/BnaC05g50230D/BnaC08g37670D/BnaC08g37680D/BnaC09g37370D/BnaCnng51610D	10
molecular_function	GO:0042626	ATPase-coupled transmembrane transporter activity	45/3317	345/76374	6.70047e-11	6.06365e-10	2.94366e-10	BnaA01g03890D/BnaA01g03950D/BnaA01g08290D/BnaA02g09690D/BnaA02g29270D/BnaA02g29470D/BnaA03g16880D/BnaA03g35510D/BnaA03g40730D/BnaA03g52290D/BnaA04g21150D/BnaA05g15910D/BnaA05g19230D/BnaA06g02860D/BnaA06g09870D/BnaA06g09880D/BnaA06g31250D/BnaA06g31620D/BnaA08g31540D/BnaA09g02390D/BnaA10g07360D/BnaC01g05260D/BnaC01g05470D/BnaC01g09840D/BnaC02g37330D/BnaC02g37560D/BnaC02g37570D/BnaC02g44600D/BnaC03g…	45
biological_process	GO:0009942	longitudinal axis specification	14/3317	35/76374	8.09326e-11	7.26403e-10	3.5264e-10	BnaA06g14040D/BnaA07g10150D/BnaA07g11660D/BnaA07g28990D/BnaA08g20690D/BnaA08g31250D/BnaC02g20430D/BnaC05g15390D/BnaC06g24400D/BnaC06g43740D/BnaC07g13310D/BnaC07g48490D/BnaC08g06140D/BnaC08g19040D	14
cellular_component	GO:0009986	cell surface	17/3317	55/76374	9.40853e-11	8.37588e-10	4.06616e-10	BnaA03g17600D/BnaA04g20290D/BnaA04g21830D/BnaA05g06540D/BnaA05g09150D/BnaA07g10150D/BnaA07g28990D/BnaA08g20690D/BnaC02g20430D/BnaC03g21070D/BnaC04g07210D/BnaC04g10560D/BnaC04g45700D/BnaC06g24400D/BnaC06g43740D/BnaC07g13310D/BnaC08g06140D	17
biological_process	GO:0010088	phloem development	9/3317	12/76374	1.06248e-10	9.38234e-10	4.55475e-10	BnaA02g36130D/BnaA03g18780D/BnaA05g05750D/BnaA07g20350D/BnaA07g34920D/BnaC03g72630D/BnaC04g05580D/BnaC06g19840D/BnaC06g39850D	9
molecular_function	GO:0052725	inositol-1,3,4-trisphosphate 6-kinase activity	11/3317	20/76374	1.19128e-10	1.03527e-09	5.02585e-10	BnaA01g03220D/BnaA03g06170D/BnaA03g38640D/BnaA03g50630D/BnaA10g17710D/BnaAnng34680D/BnaC01g04480D/BnaC03g07940D/BnaC03g66400D/BnaC09g41080D/BnaCnng47190D	11
biological_process	GO:2000033	regulation of seed dormancy process	11/3317	20/76374	1.19128e-10	1.03527e-09	5.02585e-10	BnaA05g32630D/BnaA05g32640D/BnaA06g34810D/BnaA09g18700D/BnaA10g17240D/BnaC04g17250D/BnaC05g47760D/BnaC05g47770D/BnaC07g20900D/BnaC09g40420D/BnaC09g52270D	11
biological_process	GO:0043631	RNA polyadenylation	10/3317	16/76374	1.48358e-10	1.27915e-09	6.20976e-10	BnaA06g34850D/BnaA06g35040D/BnaA07g10940D/BnaA08g22830D/BnaA09g44760D/BnaC05g47890D/BnaC07g20650D/BnaC07g48830D/BnaC08g17680D/BnaC08g37460D	10
biological_process	GO:0010541	acropetal auxin transport	18/3317	64/76374	1.53096e-10	1.30969e-09	6.35801e-10	BnaA02g18750D/BnaA02g29270D/BnaA02g29470D/BnaA03g16880D/BnaA04g21150D/BnaA06g31250D/BnaA06g31620D/BnaA07g33970D/BnaA09g02390D/BnaC02g24840D/BnaC02g37330D/BnaC02g37560D/BnaC02g37570D/BnaC03g20400D/BnaC06g38620D/BnaC07g25030D/BnaC09g01920D/BnaCnng45670D	18
biological_process	GO:0019430	removal of superoxide radicals	18/3317	65/76374	2.03109e-10	1.72406e-09	8.36963e-10	BnaA01g14450D/BnaA01g31350D/BnaA02g35530D/BnaA03g47140D/BnaA05g28000D/BnaA05g28020D/BnaA06g26040D/BnaA09g05370D/BnaA09g35800D/BnaAnng41910D/BnaC01g17020D/BnaC02g42190D/BnaC03g74080D/BnaC05g42240D/BnaC07g39340D/BnaC08g27300D/BnaC09g04910D/BnaCnng28030D	18
molecular_function	GO:0042802	identical protein binding	53/3317	464/76374	2.18391e-10	1.83953e-09	8.93016e-10	BnaA01g22450D/BnaA02g05140D/BnaA02g14920D/BnaA03g14000D/BnaA03g14010D/BnaA03g15730D/BnaA03g19280D/BnaA03g60380D/BnaA04g17560D/BnaA04g17570D/BnaA04g20290D/BnaA04g23600D/BnaA05g01910D/BnaA05g09150D/BnaA05g11950D/BnaA06g14040D/BnaA07g04390D/BnaA07g11660D/BnaA07g25700D/BnaA07g32120D/BnaA08g27770D/BnaA08g31250D/BnaA09g44950D/BnaA09g50590D/BnaA10g02500D/BnaA10g09490D/BnaA10g14620D/BnaAnng20560D/BnaC03g…	53
biological_process	GO:0010338	leaf formation	9/3317	13/76374	3.31859e-10	2.75292e-09	1.33643e-09	BnaA02g16500D/BnaA06g08740D/BnaA06g18830D/BnaA09g57150D/BnaC02g22310D/BnaC03g54740D/BnaC05g10050D/BnaC08g40210D/BnaCnng76990D	9
biological_process	GO:0030865	cortical cytoskeleton organization	9/3317	13/76374	3.31859e-10	2.75292e-09	1.33643e-09	BnaA02g35060D/BnaA03g07190D/BnaA07g16590D/BnaA09g54800D/BnaA10g16380D/BnaC02g08200D/BnaC03g09110D/BnaC06g15560D/BnaC09g39240D	9
molecular_function	GO:0016846	carbon-sulfur lyase activity	10/3317	17/76374	3.46142e-10	2.82854e-09	1.37315e-09	BnaA01g14030D/BnaA02g14990D/BnaA09g31180D/BnaA09g31200D/BnaAnng22030D/BnaAnng22040D/BnaC01g16530D/BnaC02g19980D/BnaC05g18610D/BnaC06g43720D	10
biological_process	GO:0019255	glucose 1-phosphate metabolic process	10/3317	17/76374	3.46142e-10	2.82854e-09	1.37315e-09	BnaA02g18710D/BnaA03g06870D/BnaA07g33900D/BnaA10g16760D/BnaAnng14300D/BnaC02g24750D/BnaC03g08770D/BnaC06g38530D/BnaC07g14000D/BnaC09g39780D	10
biological_process	GO:0009934	regulation of meristem structural organization	18/3317	67/76374	3.51412e-10	2.8309e-09	1.37429e-09	BnaA01g24520D/BnaA03g22900D/BnaA03g36790D/BnaA04g10140D/BnaA04g11810D/BnaA05g16930D/BnaA07g32120D/BnaA09g13310D/BnaC03g26960D/BnaC03g42960D/BnaC04g32260D/BnaC04g33950D/BnaC04g52500D/BnaC04g52510D/BnaC06g36500D/BnaC09g13580D/BnaCnng27630D/BnaCnng43520D	18
biological_process	GO:0030154	cell differentiation	54/3317	484/76374	3.52493e-10	2.8309e-09	1.37429e-09	BnaA01g03890D/BnaA01g03950D/BnaA01g08290D/BnaA01g09160D/BnaA01g29050D/BnaA01g34730D/BnaA03g02470D/BnaA03g27750D/BnaA03g33680D/BnaA03g35510D/BnaA03g39870D/BnaA03g52290D/BnaA03g53830D/BnaA03g58260D/BnaA05g11640D/BnaA05g11650D/BnaA05g15910D/BnaA05g19230D/BnaA05g24520D/BnaA06g02860D/BnaA07g32120D/BnaAnng16870D/BnaAnng06150D/BnaAnng26720D/BnaAnng27820D/BnaC01g01710D/BnaC01g05260D/BnaC01g05470D/BnaC01g…	54
biological_process	GO:0010227	floral organ abscission	27/3317	150/76374	3.56348e-10	2.8309e-09	1.37429e-09	BnaA01g03890D/BnaA01g03950D/BnaA03g52290D/BnaA04g03040D/BnaA04g23860D/BnaA05g02160D/BnaA05g14370D/BnaA06g14090D/BnaA06g21460D/BnaA07g17180D/BnaA09g05840D/BnaA09g35800D/BnaA09g36500D/BnaC01g05260D/BnaC01g05280D/BnaC01g05470D/BnaC02g38200D/BnaC03g52090D/BnaC04g01830D/BnaC04g24530D/BnaC04g47620D/BnaC08g18060D/BnaC08g27300D/BnaC08g28070D/BnaC09g05450D/BnaCnng07590D/BnaCnng54100D	27
molecular_function	GO:0004650	polygalacturonase activity	34/3317	227/76374	3.56771e-10	2.8309e-09	1.37429e-09	BnaA03g30180D/BnaA03g30200D/BnaA04g13950D/BnaA05g29810D/BnaA05g29820D/BnaA05g29830D/BnaA06g16130D/BnaA06g30420D/BnaA08g18320D/BnaA08g18330D/BnaA08g22190D/BnaA08g27230D/BnaA09g51170D/BnaA10g01390D/BnaC01g39640D/BnaC02g38360D/BnaC03g35490D/BnaC03g35510D/BnaC03g58640D/BnaC03g58650D/BnaC03g58660D/BnaC03g75750D/BnaC04g36920D/BnaC05g01430D/BnaC05g44150D/BnaC05g44170D/BnaC07g29130D/BnaC07g49180D/BnaC08g…	34
biological_process	GO:0009805	coumarin biosynthetic process	40/3317	300/76374	3.85256e-10	3.03493e-09	1.47334e-09	BnaA01g23840D/BnaA02g20270D/BnaA03g14000D/BnaA03g14010D/BnaA03g19280D/BnaA03g22900D/BnaA04g17560D/BnaA04g17570D/BnaA04g23600D/BnaA05g01910D/BnaA05g11950D/BnaA05g36390D/BnaA07g06530D/BnaA08g02980D/BnaA09g00210D/BnaA09g00220D/BnaA10g00520D/BnaAnng24330D/BnaAnng24340D/BnaC01g30780D/BnaC01g30800D/BnaC02g27750D/BnaC02g27920D/BnaC03g16950D/BnaC03g16960D/BnaC03g22980D/BnaC03g26960D/BnaC03g31760D/BnaC03g…	40
biological_process	GO:0008356	asymmetric cell division	17/3317	60/76374	4.3389e-10	3.39364e-09	1.64748e-09	BnaA01g24520D/BnaA03g36790D/BnaA05g16930D/BnaA07g10150D/BnaA07g28990D/BnaA08g15740D/BnaA08g20690D/BnaC02g20430D/BnaC03g42960D/BnaC03g61310D/BnaC06g24400D/BnaC06g43740D/BnaC07g13310D/BnaC07g46670D/BnaC08g06140D/BnaCnng27630D/BnaCnng43520D	17
biological_process	GO:0010229	inflorescence development	18/3317	68/76374	4.58471e-10	3.56047e-09	1.72847e-09	BnaA01g04490D/BnaA02g00930D/BnaA02g16500D/BnaA06g17280D/BnaA08g12160D/BnaAnng37780D/BnaAnng26720D/BnaC01g05950D/BnaC02g19450D/BnaC02g19460D/BnaC02g22310D/BnaC03g57070D/BnaC03g67260D/BnaC06g27940D/BnaC09g45330D/BnaCnng74730D/BnaCnng76990D/BnaCnng19720D	18
biological_process	GO:0010617	circadian regulation of calcium ion oscillation	8/3317	10/76374	5.2239e-10	4.02829e-09	1.95557e-09	BnaA03g34390D/BnaA05g22950D/BnaA08g27870D/BnaA10g02550D/BnaC03g39830D/BnaC05g02520D/BnaC05g36390D/BnaC08g00670D	8
biological_process	GO:0080028	nitrile biosynthetic process	12/3317	28/76374	7.01008e-10	5.36786e-09	2.60588e-09	BnaA01g28080D/BnaA03g34190D/BnaA05g23340D/BnaA05g36910D/BnaA05g36920D/BnaAnng40010D/BnaC01g35320D/BnaC01g35360D/BnaC05g36840D/BnaC05g36860D/BnaC07g11830D/BnaC07g11880D	12
molecular_function	GO:0003777	microtubule motor activity	33/3317	222/76374	7.84521e-10	5.96563e-09	2.89608e-09	BnaA01g27720D/BnaA01g28250D/BnaA03g42230D/BnaA04g16530D/BnaA05g21080D/BnaA05g22780D/BnaA05g23190D/BnaA05g23610D/BnaA06g28420D/BnaA06g30600D/BnaA09g02780D/BnaA09g03980D/BnaAnng03370D/BnaAnng07930D/BnaAnng33030D/BnaC01g23900D/BnaC01g35240D/BnaC01g35690D/BnaC01g44240D/BnaC02g38250D/BnaC03g39700D/BnaC04g39870D/BnaC05g33920D/BnaC05g36060D/BnaC05g36590D/BnaC05g37310D/BnaC06g07540D/BnaC06g07570D/BnaC07g…	33
molecular_function	GO:0003690	double-stranded DNA binding	19/3317	80/76374	1.13343e-09	8.49549e-09	4.12422e-09	BnaA01g01560D/BnaA02g18130D/BnaA04g11900D/BnaA06g14760D/BnaA06g27100D/BnaA07g11200D/BnaA08g21560D/BnaA09g04800D/BnaA09g43450D/BnaAnng26260D/BnaAnng08360D/BnaC02g24120D/BnaC05g16200D/BnaC07g11440D/BnaC07g15080D/BnaC07g29850D/BnaC08g19580D/BnaCnng30150D/BnaCnng42010D	19
cellular_component	GO:0010168	ER body	13/3317	35/76374	1.14784e-09	8.49549e-09	4.12422e-09	BnaA03g30810D/BnaA05g23650D/BnaA05g29140D/BnaA05g29150D/BnaA08g06920D/BnaAnng27630D/BnaC01g35580D/BnaC01g35590D/BnaC03g36110D/BnaC05g37360D/BnaC05g43610D/BnaC05g43620D/BnaCnng39140D	13
biological_process	GO:0010358	leaf shaping	13/3317	35/76374	1.14784e-09	8.49549e-09	4.12422e-09	BnaA01g35580D/BnaA02g16500D/BnaA06g18830D/BnaA07g08840D/BnaA09g27960D/BnaA09g31290D/BnaC01g23810D/BnaC02g22310D/BnaC03g54740D/BnaC05g21270D/BnaC05g34660D/BnaC07g11380D/BnaCnng76990D	13
molecular_function	GO:0010011	auxin binding	12/3317	29/76374	1.14825e-09	8.49549e-09	4.12422e-09	BnaA03g17600D/BnaA04g00230D/BnaA04g21830D/BnaA05g06540D/BnaA07g19520D/BnaA09g40340D/BnaC03g21070D/BnaC04g07210D/BnaC04g45700D/BnaC06g43000D/BnaC08g32660D/BnaCnng60850D	12
molecular_function	GO:0004614	phosphoglucomutase activity	10/3317	19/76374	1.51758e-09	1.11527e-08	5.41417e-09	BnaA02g18710D/BnaA03g06870D/BnaA07g33900D/BnaA10g16760D/BnaAnng14300D/BnaC02g24750D/BnaC03g08770D/BnaC06g38530D/BnaC07g14000D/BnaC09g39780D	10
cellular_component	GO:0005871	kinesin complex	31/3317	207/76374	2.0958e-09	1.50613e-08	7.31168e-09	BnaA01g27720D/BnaA01g28250D/BnaA03g42230D/BnaA04g16530D/BnaA05g21080D/BnaA05g22780D/BnaA05g23190D/BnaA05g23610D/BnaA06g28420D/BnaA06g30600D/BnaA09g02780D/BnaA09g03980D/BnaAnng03370D/BnaAnng07930D/BnaAnng33030D/BnaC01g23900D/BnaC01g35240D/BnaC01g44240D/BnaC02g38250D/BnaC03g39700D/BnaC04g39870D/BnaC05g33920D/BnaC05g36060D/BnaC05g36590D/BnaC05g37310D/BnaC06g07540D/BnaC07g26190D/BnaC07g28380D/BnaCnng…	31
biological_process	GO:0000913	preprophase band assembly	9/3317	15/76374	2.14572e-09	1.50613e-08	7.31168e-09	BnaA02g35060D/BnaA03g07190D/BnaA07g16590D/BnaA09g54800D/BnaA10g16380D/BnaC02g08200D/BnaC03g09110D/BnaC06g15560D/BnaC09g39240D	9
biological_process	GO:0031669	cellular response to nutrient levels	9/3317	15/76374	2.14572e-09	1.50613e-08	7.31168e-09	BnaA04g12160D/BnaA09g43200D/BnaC02g14820D/BnaC04g33510D/BnaC04g35070D/BnaC07g29900D/BnaC08g35720D/BnaCnng75420D/BnaCnng37770D	9
biological_process	GO:0032119	sequestering of zinc ion	9/3317	15/76374	2.14572e-09	1.50613e-08	7.31168e-09	BnaA04g12160D/BnaA09g43200D/BnaC02g14820D/BnaC04g33510D/BnaC04g35070D/BnaC07g29900D/BnaC08g35720D/BnaCnng75420D/BnaCnng37770D	9
biological_process	GO:0043181	vacuolar sequestering	9/3317	15/76374	2.14572e-09	1.50613e-08	7.31168e-09	BnaA04g12160D/BnaA09g43200D/BnaC02g14820D/BnaC04g33510D/BnaC04g35070D/BnaC07g29900D/BnaC08g35720D/BnaCnng75420D/BnaCnng37770D	9
biological_process	GO:0070072	vacuolar proton-transporting V-type ATPase complex assembly	9/3317	15/76374	2.14572e-09	1.50613e-08	7.31168e-09	BnaA04g12160D/BnaA09g43200D/BnaC02g14820D/BnaC04g33510D/BnaC04g35070D/BnaC07g29900D/BnaC08g35720D/BnaCnng75420D/BnaCnng37770D	9
molecular_function	GO:1990135	flavonoid sulfotransferase activity	9/3317	15/76374	2.14572e-09	1.50613e-08	7.31168e-09	BnaA02g27300D/BnaA09g53480D/BnaAnng13870D/BnaC02g35150D/BnaC02g35160D/BnaC09g22120D/BnaC09g52480D/BnaC09g52360D/BnaCnng56120D	9
biological_process	GO:0010087	phloem or xylem histogenesis	20/3317	92/76374	2.2139e-09	1.54409e-08	7.49595e-09	BnaA01g14030D/BnaA02g14990D/BnaA03g51820D/BnaA05g11140D/BnaA06g22420D/BnaA07g34360D/BnaA09g06280D/BnaA09g31180D/BnaA09g31200D/BnaAnng22030D/BnaAnng22040D/BnaC01g16530D/BnaC02g19980D/BnaC03g51310D/BnaC03g70510D/BnaC04g12830D/BnaC05g18610D/BnaC06g39190D/BnaC06g43720D/BnaC09g05850D	20
biological_process	GO:0010817	regulation of hormone levels	31/3317	208/76374	2.36092e-09	1.63621e-08	7.94313e-09	BnaA01g02640D/BnaA01g05490D/BnaA01g15170D/BnaA01g35050D/BnaA02g02680D/BnaA03g44500D/BnaA03g47710D/BnaA03g52870D/BnaA06g40640D/BnaA07g23670D/BnaA08g11150D/BnaA08g16520D/BnaA08g30450D/BnaA08g30460D/BnaA10g18650D/BnaC01g03880D/BnaC01g41560D/BnaC01g40650D/BnaC01g40660D/BnaC02g06120D/BnaC03g60590D/BnaC03g63780D/BnaC03g63790D/BnaC03g66050D/BnaC06g24760D/BnaC07g36330D/BnaC07g39990D/BnaC07g47240D/BnaC08g…	31
biological_process	GO:0010540	basipetal auxin transport	21/3317	102/76374	2.53358e-09	1.74482e-08	8.47042e-09	BnaA02g18750D/BnaA02g29270D/BnaA02g29470D/BnaA03g16880D/BnaA04g21150D/BnaA04g26870D/BnaA06g31250D/BnaA06g31620D/BnaA07g33970D/BnaA09g02390D/BnaC02g24840D/BnaC02g37330D/BnaC02g37560D/BnaC02g37570D/BnaC03g20400D/BnaC04g00490D/BnaC04g51510D/BnaC06g38620D/BnaC07g25030D/BnaC09g01920D/BnaCnng45670D	21
biological_process	GO:0001708	cell fate specification	23/3317	122/76374	2.75873e-09	1.88563e-08	9.15398e-09	BnaA01g07810D/BnaA02g25790D/BnaA02g35530D/BnaA03g23610D/BnaA06g09570D/BnaA06g34780D/BnaA08g13510D/BnaA09g18740D/BnaA09g45470D/BnaAnng41910D/BnaC01g09350D/BnaC02g34020D/BnaC02g34030D/BnaC03g28030D/BnaC05g10940D/BnaC07g20940D/BnaC08g13430D/BnaC08g39310D/BnaCnng69610D/BnaCnng28030D/BnaCnng75540D/BnaCnng59830D/BnaCnng17820D	23
biological_process	GO:0010047	fruit dehiscence	14/3317	44/76374	2.77248e-09	1.88563e-08	9.15398e-09	BnaA04g08800D/BnaA05g14370D/BnaA06g14090D/BnaA06g21460D/BnaA07g12110D/BnaA09g05840D/BnaC02g34930D/BnaC03g52090D/BnaC04g13390D/BnaC04g31090D/BnaC07g16290D/BnaC08g18060D/BnaC09g05450D/BnaCnng54100D	14
biological_process	GO:0007389	pattern specification process	30/3317	198/76374	2.85589e-09	1.93037e-08	9.37118e-09	BnaA01g07810D/BnaA02g17280D/BnaA02g26940D/BnaA03g17600D/BnaA03g36950D/BnaA04g21830D/BnaA05g06540D/BnaA05g16680D/BnaA06g07360D/BnaA06g13970D/BnaA07g21650D/BnaA08g05350D/BnaA08g13510D/BnaAnng09150D/BnaAnng31570D/BnaC01g09350D/BnaC01g43640D/BnaC02g24360D/BnaC02g47640D/BnaC03g21070D/BnaC04g07210D/BnaC04g45700D/BnaC05g29300D/BnaC06g22330D/BnaC06g43960D/BnaC07g15630D/BnaC07g16810D/BnaC08g13430D/BnaC08g…	30
molecular_function	GO:0004602	glutathione peroxidase activity	13/3317	38/76374	3.72506e-09	2.50242e-08	1.21483e-08	BnaA01g37280D/BnaA02g21680D/BnaA03g14580D/BnaA03g20200D/BnaA05g11240D/BnaA09g21570D/BnaAnng31150D/BnaC03g17600D/BnaC03g24130D/BnaC08g33590D/BnaCnng27540D/BnaCnng08430D/BnaCnng67520D	13
molecular_function	GO:0050661	NADP binding	29/3317	189/76374	3.87238e-09	2.58552e-08	1.25517e-08	BnaA01g04490D/BnaA01g08170D/BnaA02g00930D/BnaA02g31890D/BnaA06g03430D/BnaA06g03450D/BnaA06g08330D/BnaA06g39380D/BnaA07g20300D/BnaA08g12160D/BnaA08g13610D/BnaA09g04510D/BnaA09g47340D/BnaAnng39990D/BnaAnng41850D/BnaC01g05950D/BnaC01g09750D/BnaC02g25850D/BnaC02g48550D/BnaC03g67260D/BnaC06g02330D/BnaC06g19790D/BnaC07g29140D/BnaC08g13170D/BnaC08g41500D/BnaC09g03930D/BnaC09g45330D/BnaCnng74730D/BnaCnng…	29
biological_process	GO:0048589	developmental growth	25/3317	145/76374	3.96554e-09	2.63168e-08	1.27758e-08	BnaA01g27720D/BnaA02g15390D/BnaA03g30920D/BnaA03g42230D/BnaA03g51820D/BnaA05g23190D/BnaA05g34020D/BnaA06g34310D/BnaA07g23670D/BnaA07g29450D/BnaAnng36480D/BnaAnng33030D/BnaC01g35240D/BnaC02g20640D/BnaC03g39700D/BnaC05g36590D/BnaC05g48680D/BnaC06g07540D/BnaC06g07570D/BnaC06g32640D/BnaC07g21520D/BnaCnng69150D/BnaCnng29160D/BnaCnng29190D/BnaCnng07880D	25
biological_process	GO:2000024	regulation of leaf development	9/3317	16/76374	4.71377e-09	3.10938e-08	1.50948e-08	BnaA01g04490D/BnaA02g00930D/BnaA08g12160D/BnaAnng37780D/BnaC01g05950D/BnaC03g67260D/BnaC09g45330D/BnaCnng74730D/BnaCnng19720D	9
molecular_function	GO:0047911	galacturan 1,4-alpha-galacturonidase activity	8/3317	12/76374	5.31269e-09	3.48347e-08	1.69108e-08	BnaA03g30200D/BnaA05g29810D/BnaA05g29820D/BnaA05g29830D/BnaC03g35510D/BnaC05g44150D/BnaC05g44170D/BnaC07g29130D	8
biological_process	GO:0009269	response to desiccation	28/3317	183/76374	7.59476e-09	4.95016e-08	2.4031e-08	BnaA01g05320D/BnaA03g36950D/BnaA04g11900D/BnaA04g12170D/BnaA05g16680D/BnaA05g18020D/BnaA08g05350D/BnaA08g16740D/BnaA09g18200D/BnaA09g53560D/BnaA10g03290D/BnaAnng16310D/BnaC01g00170D/BnaC01g43640D/BnaC04g33500D/BnaC04g47950D/BnaC05g03300D/BnaC05g28450D/BnaC05g29300D/BnaC07g09190D/BnaC07g11440D/BnaC07g16810D/BnaC08g07580D/BnaC08g44090D/BnaC08g44140D/BnaC08g47390D/BnaC09g19730D/BnaCnng71840D	28
molecular_function	GO:0004857	enzyme inhibitor activity	30/3317	207/76374	8.23919e-09	5.33841e-08	2.59159e-08	BnaA01g08290D/BnaA02g35040D/BnaA03g01580D/BnaA03g29100D/BnaA03g35510D/BnaA05g15910D/BnaA05g19230D/BnaA05g31600D/BnaA05g33390D/BnaA06g02860D/BnaA07g19220D/BnaA09g39720D/BnaAnng02770D/BnaAnng12670D/BnaC01g09840D/BnaC02g06570D/BnaC03g01860D/BnaC03g34350D/BnaC03g34360D/BnaC03g41300D/BnaC04g21470D/BnaC05g32690D/BnaC05g32750D/BnaC05g46150D/BnaC06g03520D/BnaC06g18400D/BnaCnng25790D/BnaCnng73730D/BnaCnng…	30
biological_process	GO:0009742	brassinosteroid mediated signaling pathway	31/3317	219/76374	8.29826e-09	5.34506e-08	2.59481e-08	BnaA01g05490D/BnaA01g08170D/BnaA04g05130D/BnaA06g37360D/BnaA06g40640D/BnaA07g15850D/BnaA07g18560D/BnaA07g22200D/BnaA07g31610D/BnaA08g13610D/BnaA08g16520D/BnaA08g16920D/BnaA09g33270D/BnaAnng41850D/BnaAnng07360D/BnaAnng30830D/BnaC01g09750D/BnaC01g40650D/BnaC01g40660D/BnaC03g20100D/BnaC03g60160D/BnaC03g60590D/BnaC06g14240D/BnaC06g22930D/BnaC06g22940D/BnaC06g35430D/BnaC07g47240D/BnaC07g47630D/BnaC08g…	31
cellular_component	GO:0009925	basal plasma membrane	9/3317	17/76374	9.62734e-09	6.16488e-08	2.9928e-08	BnaA02g08340D/BnaA02g16500D/BnaA03g10430D/BnaA10g11110D/BnaC02g22310D/BnaC03g13120D/BnaC09g53450D/BnaCnng76990D/BnaCnng64920D	9
biological_process	GO:0042744	hydrogen peroxide catabolic process	44/3317	390/76374	1.02868e-08	6.54885e-08	3.17921e-08	BnaA01g17570D/BnaA03g17800D/BnaA03g42440D/BnaA04g21990D/BnaA04g22000D/BnaA05g14370D/BnaA06g03430D/BnaA06g03450D/BnaA06g07360D/BnaA06g21460D/BnaA06g34810D/BnaA06g36920D/BnaA08g27870D/BnaA09g05840D/BnaA09g18700D/BnaA09g54380D/BnaA10g02550D/BnaA10g08930D/BnaA10g28850D/BnaAnng34820D/BnaAnng06520D/BnaAnng30060D/BnaAnng32690D/BnaAnng32790D/BnaC01g21920D/BnaC02g30040D/BnaC03g52090D/BnaC04g17250D/BnaC04g…	44
biological_process	GO:0044036	cell wall macromolecule metabolic process	32/3317	234/76374	1.12609e-08	7.12755e-08	3.46014e-08	BnaA01g00290D/BnaA02g16500D/BnaA02g28260D/BnaA04g04200D/BnaA04g07000D/BnaA04g13440D/BnaA05g01130D/BnaA05g01140D/BnaA05g21000D/BnaA08g05020D/BnaA08g15790D/BnaA08g17590D/BnaA09g26470D/BnaA10g25210D/BnaAnng27870D/BnaC01g01290D/BnaC02g22310D/BnaC02g36330D/BnaC03g61270D/BnaC04g00700D/BnaC04g04180D/BnaC04g35580D/BnaC04g56960D/BnaC05g23030D/BnaC05g33740D/BnaC07g46770D/BnaC09g50140D/BnaCnng72090D/BnaCnng…	32
molecular_function	GO:0004871	obsolete signal transducer activity	42/3317	367/76374	1.45474e-08	9.15483e-08	4.44431e-08	BnaA01g22700D/BnaA02g02030D/BnaA02g05000D/BnaA03g43790D/BnaA03g56070D/BnaA04g10100D/BnaA04g13440D/BnaA06g05060D/BnaA07g04510D/BnaA07g04970D/BnaA08g26800D/BnaA09g08440D/BnaA09g13180D/BnaA09g13680D/BnaA09g13690D/BnaA09g15850D/BnaA09g40600D/BnaA10g14860D/BnaAnng14510D/BnaAnng03900D/BnaAnng05180D/BnaC01g29540D/BnaC02g16630D/BnaC03g10200D/BnaC04g35580D/BnaC05g06330D/BnaC07g15920D/BnaC08g07170D/BnaC08g…	42
biological_process	GO:0043044	ATP-dependent chromatin remodeling	9/3317	18/76374	1.85065e-08	1.1514e-07	5.58957e-08	BnaA03g18330D/BnaA05g30940D/BnaA10g16340D/BnaAnng03220D/BnaAnng08460D/BnaC02g08260D/BnaC03g21850D/BnaC05g45420D/BnaC09g39190D	9
biological_process	GO:0048826	cotyledon morphogenesis	9/3317	18/76374	1.85065e-08	1.1514e-07	5.58957e-08	BnaA02g14550D/BnaA02g16500D/BnaA07g24100D/BnaA07g28310D/BnaC02g22310D/BnaC06g25160D/BnaC06g30800D/BnaCnng70120D/BnaCnng76990D	9
biological_process	GO:0009638	phototropism	16/3317	67/76374	2.10774e-08	1.30394e-07	6.33012e-08	BnaA01g28670D/BnaA02g05070D/BnaA03g33930D/BnaA03g34390D/BnaA05g22950D/BnaA08g27870D/BnaA10g02550D/BnaA10g14760D/BnaC01g36030D/BnaC03g39170D/BnaC03g39830D/BnaC05g02520D/BnaC05g36390D/BnaC08g00670D/BnaC09g37130D/BnaCnng74250D	16
biological_process	GO:0009735	response to cytokinin	31/3317	229/76374	2.40468e-08	1.47929e-07	7.18134e-08	BnaA04g26870D/BnaA06g05600D/BnaA06g07730D/BnaA06g17280D/BnaA07g31240D/BnaA08g26200D/BnaA08g27000D/BnaA08g28200D/BnaA09g46720D/BnaA09g50410D/BnaA10g03210D/BnaAnng26720D/BnaC02g19450D/BnaC02g19460D/BnaC03g57070D/BnaC04g00490D/BnaC04g12390D/BnaC04g51510D/BnaC05g03200D/BnaC05g03220D/BnaC05g07140D/BnaC05g09160D/BnaC06g27940D/BnaC06g34980D/BnaC08g12460D/BnaC08g13800D/BnaC08g36440D/BnaC08g40750D/BnaC08g…	31
biological_process	GO:0048825	cotyledon development	40/3317	347/76374	2.59074e-08	1.58484e-07	7.69375e-08	BnaA01g04490D/BnaA01g14030D/BnaA01g35820D/BnaA02g00930D/BnaA02g14990D/BnaA04g20290D/BnaA05g09150D/BnaA06g07730D/BnaA07g27740D/BnaA07g36710D/BnaA08g12160D/BnaA08g19170D/BnaA09g14430D/BnaA09g14440D/BnaA09g26050D/BnaA09g31180D/BnaA09g31200D/BnaA09g46720D/BnaAnng37780D/BnaAnng22030D/BnaAnng22040D/BnaC01g05950D/BnaC01g16530D/BnaC01g28350D/BnaC02g19980D/BnaC03g67260D/BnaC04g10560D/BnaC04g18720D/BnaC05g…	40
biological_process	GO:0043085	positive regulation of catalytic activity	45/3317	417/76374	2.70574e-08	1.64599e-07	7.99063e-08	BnaA01g08290D/BnaA02g09460D/BnaA02g18710D/BnaA02g27980D/BnaA02g35040D/BnaA03g09840D/BnaA03g11710D/BnaA03g35510D/BnaA03g59020D/BnaA04g22200D/BnaA05g06370D/BnaA05g15910D/BnaA05g19230D/BnaA05g33390D/BnaA06g02860D/BnaA07g04200D/BnaA07g33040D/BnaA07g33900D/BnaA09g43110D/BnaA10g08550D/BnaA10g12020D/BnaAnng12670D/BnaAnng14300D/BnaC01g09840D/BnaC01g25910D/BnaC02g06570D/BnaC02g24750D/BnaC03g12470D/BnaC03g…	45
biological_process	GO:0009821	alkaloid biosynthetic process	13/3317	44/76374	2.79662e-08	1.68258e-07	8.16826e-08	BnaA04g02940D/BnaA04g02970D/BnaA04g15750D/BnaA07g17130D/BnaA09g36360D/BnaC04g24610D/BnaC04g24620D/BnaC04g24650D/BnaC04g24660D/BnaC04g39030D/BnaC05g15360D/BnaC08g27940D/BnaCnng26110D	13
biological_process	GO:0031540	regulation of anthocyanin biosynthetic process	13/3317	44/76374	2.79662e-08	1.68258e-07	8.16826e-08	BnaA02g35530D/BnaA03g39820D/BnaA07g27740D/BnaA09g05500D/BnaAnng41910D/BnaAnng06660D/BnaC02g41870D/BnaC03g74080D/BnaC07g49790D/BnaCnng28030D/BnaCnng52780D/BnaCnng52790D/BnaCnng61410D	13
biological_process	GO:0000024	maltose biosynthetic process	8/3317	14/76374	2.98006e-08	1.78315e-07	8.6565e-08	BnaA01g35050D/BnaA03g44500D/BnaA08g30450D/BnaA08g30460D/BnaC03g63780D/BnaC03g63790D/BnaC07g36330D/BnaCnng39750D	8
biological_process	GO:0009785	blue light signaling pathway	17/3317	79/76374	4.08015e-08	2.42813e-07	1.17876e-07	BnaA02g05070D/BnaA03g16870D/BnaA05g07510D/BnaA06g37360D/BnaA08g16920D/BnaA08g27870D/BnaA09g40600D/BnaA10g02550D/BnaA10g14760D/BnaC03g20340D/BnaC03g60160D/BnaC04g08340D/BnaC05g02520D/BnaC07g47630D/BnaC08g00670D/BnaC08g33050D/BnaC09g37130D	17
molecular_function	GO:0000155	phosphorelay sensor kinase activity	15/3317	62/76374	4.79831e-08	2.84008e-07	1.37875e-07	BnaA03g03090D/BnaA03g03100D/BnaA03g34390D/BnaA05g22950D/BnaA06g34500D/BnaA10g21570D/BnaAnng24980D/BnaC02g00180D/BnaC03g04510D/BnaC03g39830D/BnaC05g36390D/BnaC07g21210D/BnaC07g21250D/BnaC07g21260D/BnaC09g45760D	15
biological_process	GO:0023014	signal transduction by protein phosphorylation	17/3317	80/76374	4.97147e-08	2.92675e-07	1.42082e-07	BnaA03g03090D/BnaA03g03100D/BnaA03g34390D/BnaA05g22950D/BnaA06g34500D/BnaA07g32120D/BnaA10g21570D/BnaAnng24980D/BnaC02g00180D/BnaC03g04510D/BnaC03g39830D/BnaC05g36390D/BnaC06g36500D/BnaC07g21210D/BnaC07g21250D/BnaC07g21260D/BnaC09g45760D	17
molecular_function	GO:0003755	peptidyl-prolyl cis-trans isomerase activity	26/3317	176/76374	5.32256e-08	3.11669e-07	1.51303e-07	BnaA01g02340D/BnaA01g25460D/BnaA01g36700D/BnaA03g41590D/BnaA03g57030D/BnaA04g17840D/BnaA06g18830D/BnaA06g24990D/BnaA06g37360D/BnaA08g16920D/BnaA09g08780D/BnaA09g32520D/BnaA09g35540D/BnaAnng41240D/BnaC01g03590D/BnaC03g27660D/BnaC03g48580D/BnaC03g54740D/BnaC03g60160D/BnaC03g71020D/BnaC06g10280D/BnaC07g32670D/BnaC07g47630D/BnaC08g23390D/BnaC08g26990D/BnaC09g09060D	26
biological_process	GO:0043068	positive regulation of programmed cell death	12/3317	39/76374	5.76859e-08	3.3599e-07	1.6311e-07	BnaA01g08290D/BnaA03g35510D/BnaA05g15910D/BnaA05g19230D/BnaA06g02860D/BnaC01g09840D/BnaC03g41300D/BnaC05g32690D/BnaC05g32750D/BnaC06g03520D/BnaCnng25790D/BnaCnng73730D	12
biological_process	GO:0070301	cellular response to hydrogen peroxide	9/3317	20/76374	5.90623e-08	3.42186e-07	1.66118e-07	BnaA03g03090D/BnaA03g03100D/BnaA08g16660D/BnaA10g21570D/BnaAnng24980D/BnaC02g00180D/BnaC03g04510D/BnaC03g60430D/BnaC09g45760D	9
biological_process	GO:0010187	negative regulation of seed germination	18/3317	91/76374	6.55081e-08	3.77533e-07	1.83277e-07	BnaA01g00730D/BnaA05g08020D/BnaA05g32630D/BnaA05g32640D/BnaA06g34810D/BnaA08g15580D/BnaA09g18700D/BnaA10g17240D/BnaAnng07530D/BnaC01g01720D/BnaC03g61610D/BnaC04g09030D/BnaC04g17250D/BnaC05g47760D/BnaC05g47770D/BnaC07g20900D/BnaC09g40420D/BnaC09g52270D	18
molecular_function	GO:0005199	structural constituent of cell wall	13/3317	47/76374	6.70679e-08	3.84499e-07	1.86659e-07	BnaA01g20650D/BnaA01g24500D/BnaA05g16890D/BnaA06g38270D/BnaA07g31240D/BnaA08g24970D/BnaA09g47410D/BnaC05g29690D/BnaC05g49420D/BnaC06g34980D/BnaC08g15300D/BnaC08g41590D/BnaCnng14150D	13
molecular_function	GO:0008017	microtubule binding	38/3317	334/76374	8.03449e-08	4.57655e-07	2.22173e-07	BnaA01g27720D/BnaA01g28250D/BnaA02g02680D/BnaA03g42230D/BnaA04g16530D/BnaA05g21080D/BnaA05g22780D/BnaA05g23190D/BnaA05g23610D/BnaA06g21560D/BnaA06g28420D/BnaA06g30600D/BnaA09g02780D/BnaA09g03980D/BnaA09g19860D/BnaA10g18650D/BnaAnng03370D/BnaAnng07930D/BnaAnng33030D/BnaC01g23900D/BnaC01g35240D/BnaC01g44240D/BnaC02g06120D/BnaC02g38250D/BnaC03g39700D/BnaC04g39870D/BnaC05g33920D/BnaC05g36060D/BnaC05g…	38
biological_process	GO:0016131	brassinosteroid metabolic process	11/3317	33/76374	8.12749e-08	4.57655e-07	2.22173e-07	BnaA02g27290D/BnaA02g27300D/BnaA09g53480D/BnaA09g53490D/BnaAnng13870D/BnaC02g35150D/BnaC02g35160D/BnaC09g22120D/BnaC09g52480D/BnaC09g52360D/BnaCnng56120D	11
molecular_function	GO:0004619	phosphoglycerate mutase activity	7/3317	11/76374	8.19181e-08	4.57655e-07	2.22173e-07	BnaA02g18710D/BnaA07g33900D/BnaAnng14300D/BnaC02g24750D/BnaC06g38530D/BnaC07g13990D/BnaC07g14000D	7
molecular_function	GO:0031491	nucleosome binding	7/3317	11/76374	8.19181e-08	4.57655e-07	2.22173e-07	BnaA05g30940D/BnaA10g16340D/BnaAnng03220D/BnaAnng08460D/BnaC02g08260D/BnaC05g45420D/BnaC09g39190D	7
biological_process	GO:2000023	regulation of lateral root development	7/3317	11/76374	8.19181e-08	4.57655e-07	2.22173e-07	BnaA01g04940D/BnaA01g04960D/BnaA03g51810D/BnaA09g55820D/BnaC01g06510D/BnaC01g06530D/BnaC08g33530D	7
cellular_component	GO:0019005	SCF ubiquitin ligase complex	20/3317	113/76374	8.76878e-08	4.87402e-07	2.36614e-07	BnaA01g13690D/BnaA02g29980D/BnaA04g00230D/BnaA06g30400D/BnaA06g37360D/BnaA07g19520D/BnaA08g16920D/BnaA09g02870D/BnaA09g40340D/BnaC01g16070D/BnaC02g38380D/BnaC03g60160D/BnaC04g52500D/BnaC04g52510D/BnaC06g43000D/BnaC07g47630D/BnaC07g49160D/BnaC08g32660D/BnaC09g02290D/BnaCnng60850D	20
molecular_function	GO:0050362	L-tryptophan:2-oxoglutarate aminotransferase activity	10/3317	27/76374	1.00645e-07	5.566e-07	2.70207e-07	BnaA01g14030D/BnaA02g14990D/BnaA09g31180D/BnaA09g31200D/BnaAnng22030D/BnaAnng22040D/BnaC01g16530D/BnaC02g19980D/BnaC05g18610D/BnaC06g43720D	10
biological_process	GO:0009636	response to toxic substance	11/3317	34/76374	1.15408e-07	6.35036e-07	3.08285e-07	BnaA02g20270D/BnaA09g00210D/BnaA09g00220D/BnaA10g00520D/BnaAnng24330D/BnaAnng24340D/BnaC02g27750D/BnaC03g31760D/BnaC03g31770D/BnaC05g00580D/BnaCnng01870D	11
biological_process	GO:0010218	response to far red light	42/3317	396/76374	1.24591e-07	6.82134e-07	3.31149e-07	BnaA01g04710D/BnaA02g26940D/BnaA02g29470D/BnaA03g02610D/BnaA03g05650D/BnaA03g17600D/BnaA03g34390D/BnaA03g51960D/BnaA04g21830D/BnaA05g06540D/BnaA05g22950D/BnaA06g31250D/BnaA06g34810D/BnaA07g10150D/BnaA07g28990D/BnaA08g20690D/BnaA09g02390D/BnaA09g18700D/BnaA10g18480D/BnaAnng06020D/BnaC01g06240D/BnaC02g01060D/BnaC02g20430D/BnaC02g37560D/BnaC02g37570D/BnaC02g47640D/BnaC03g07350D/BnaC03g21070D/BnaC03g…	42
molecular_function	GO:0045330	aspartyl esterase activity	27/3317	197/76374	1.44552e-07	7.87486e-07	3.82293e-07	BnaA01g27440D/BnaA02g25490D/BnaA03g01580D/BnaA03g02030D/BnaA03g29100D/BnaA03g34410D/BnaA05g22940D/BnaA05g31600D/BnaA06g39970D/BnaA07g19220D/BnaA09g39720D/BnaA10g23870D/BnaAnng02770D/BnaAnng13710D/BnaC02g01620D/BnaC03g01860D/BnaC03g03040D/BnaC03g34350D/BnaC03g34360D/BnaC03g39840D/BnaC04g21470D/BnaC05g36370D/BnaC05g46150D/BnaC06g18400D/BnaC07g20260D/BnaCnng61650D/BnaCnng66900D	27
cellular_component	GO:0000220	vacuolar proton-transporting V-type ATPase, V0 domain	9/3317	22/76374	1.61604e-07	8.76024e-07	4.25275e-07	BnaA04g12160D/BnaA09g43200D/BnaC02g14820D/BnaC04g33510D/BnaC04g35070D/BnaC07g29900D/BnaC08g35720D/BnaCnng75420D/BnaCnng37770D	9
molecular_function	GO:0004049	anthranilate synthase activity	7/3317	12/76374	1.89166e-07	1.02038e-06	4.95352e-07	BnaA03g01690D/BnaA03g21950D/BnaA10g24820D/BnaC03g02240D/BnaC03g26270D/BnaC04g23920D/BnaC09g49740D	7
biological_process	GO:2000032	regulation of secondary shoot formation	8/3317	17/76374	2.14518e-07	1.15146e-06	5.58986e-07	BnaA01g26700D/BnaA02g14010D/BnaA03g34820D/BnaC01g34090D/BnaC02g18540D/BnaC05g51920D/BnaC06g29550D/BnaCnng23770D	8
biological_process	GO:0071219	cellular response to molecule of bacterial origin	9/3317	23/76374	2.55198e-07	1.36313e-06	6.61745e-07	BnaA03g03090D/BnaA03g03100D/BnaA08g16660D/BnaA10g21570D/BnaAnng24980D/BnaC02g00180D/BnaC03g04510D/BnaC03g60430D/BnaC09g45760D	9
biological_process	GO:0010199	organ boundary specification between lateral organs and the meristem	10/3317	30/76374	3.17994e-07	1.69031e-06	8.20577e-07	BnaA03g18330D/BnaA08g19860D/BnaA09g06440D/BnaA09g29250D/BnaAnng31240D/BnaC03g21850D/BnaC05g51000D/BnaCnng60770D/BnaCnng12230D/BnaCnng15670D	10
biological_process	GO:0009086	methionine biosynthetic process	41/3317	399/76374	4.05228e-07	2.1436e-06	1.04063e-06	BnaA02g19470D/BnaA03g15370D/BnaA04g10680D/BnaA04g23330D/BnaA05g10300D/BnaA05g17900D/BnaA06g07270D/BnaA06g11840D/BnaA06g30600D/BnaA07g04390D/BnaA07g19990D/BnaA08g31650D/BnaA09g00950D/BnaA09g02780D/BnaA09g30380D/BnaAnng33870D/BnaAnng33880D/BnaAnng07930D/BnaC01g44720D/BnaC02g38250D/BnaC02g46530D/BnaC03g18580D/BnaC04g01430D/BnaC04g11220D/BnaC04g32990D/BnaC04g47240D/BnaC05g13680D/BnaC05g18030D/BnaC05g…	41
biological_process	GO:0009933	meristem structural organization	35/3317	314/76374	4.17124e-07	2.19592e-06	1.06603e-06	BnaA02g18130D/BnaA02g26510D/BnaA02g35830D/BnaA03g18330D/BnaA03g21110D/BnaA03g51290D/BnaA05g08020D/BnaA05g10850D/BnaA06g34100D/BnaA07g21350D/BnaA07g24360D/BnaA07g27710D/BnaA07g27740D/BnaA07g32820D/BnaA07g38010D/BnaA08g12690D/BnaAnng40070D/BnaAnng07530D/BnaC01g07310D/BnaC01g14560D/BnaC02g24120D/BnaC02g34690D/BnaC03g21850D/BnaC03g25170D/BnaC03g77370D/BnaC04g09030D/BnaC04g12390D/BnaC04g50150D/BnaC06g…	35
biological_process	GO:0080022	primary root development	17/3317	94/76374	5.78889e-07	3.03294e-06	1.47237e-06	BnaA01g14030D/BnaA02g14990D/BnaA04g14760D/BnaA07g20300D/BnaA09g31180D/BnaA09g31200D/BnaAnng22030D/BnaAnng22040D/BnaC01g16530D/BnaC02g19980D/BnaC02g25850D/BnaC04g56320D/BnaC05g18610D/BnaC06g09070D/BnaC06g19790D/BnaC06g43720D/BnaC08g10460D	17
biological_process	GO:0010589	leaf proximal/distal pattern formation	8/3317	19/76374	6.16804e-07	3.21619e-06	1.56133e-06	BnaA06g05600D/BnaA06g09570D/BnaA08g26200D/BnaA09g45470D/BnaC05g07140D/BnaC05g10940D/BnaC08g13800D/BnaC08g39310D	8
molecular_function	GO:0008447	L-ascorbate oxidase activity	10/3317	32/76374	6.30459e-07	3.27181e-06	1.58833e-06	BnaA01g29840D/BnaA02g21430D/BnaA03g32800D/BnaA05g25900D/BnaA06g00300D/BnaC01g37690D/BnaC03g37900D/BnaC05g39980D/BnaC06g07290D/BnaC09g53590D	10
biological_process	GO:0000413	protein peptidyl-prolyl isomerization	23/3317	163/76374	6.9904e-07	3.61061e-06	1.75281e-06	BnaA01g02340D/BnaA01g25460D/BnaA03g41590D/BnaA03g57030D/BnaA06g18830D/BnaA06g24990D/BnaA06g37360D/BnaA08g16920D/BnaA09g08780D/BnaA09g32520D/BnaA09g35540D/BnaAnng41240D/BnaC01g03590D/BnaC03g48580D/BnaC03g54740D/BnaC03g60160D/BnaC03g71020D/BnaC06g10280D/BnaC07g32670D/BnaC07g47630D/BnaC08g23390D/BnaC08g26990D/BnaC09g09060D	23
biological_process	GO:0048657	anther wall tapetum cell differentiation	7/3317	14/76374	7.58926e-07	3.90152e-06	1.89403e-06	BnaA01g05490D/BnaA06g40640D/BnaA08g16520D/BnaC01g40650D/BnaC01g40660D/BnaC03g60590D/BnaC07g47240D	7
biological_process	GO:0042752	regulation of circadian rhythm	21/3317	141/76374	8.53387e-07	4.36663e-06	2.11983e-06	BnaA02g30480D/BnaA03g02470D/BnaA04g00230D/BnaA06g37360D/BnaA06g39620D/BnaA07g19520D/BnaA08g16920D/BnaA09g03180D/BnaA09g40340D/BnaAnng06150D/BnaC02g01170D/BnaC02g38810D/BnaC03g03480D/BnaC03g60160D/BnaC06g43000D/BnaC07g26830D/BnaC07g47630D/BnaC08g32660D/BnaC09g02610D/BnaC09g47560D/BnaCnng60850D	21
biological_process	GO:0048509	regulation of meristem development	10/3317	33/76374	8.69234e-07	4.42678e-06	2.14902e-06	BnaA03g09840D/BnaA06g34500D/BnaA07g04200D/BnaA10g12020D/BnaC01g25910D/BnaC03g12470D/BnaC07g21210D/BnaC07g21250D/BnaC07g21260D/BnaC09g33710D	10
biological_process	GO:0009788	negative regulation of abscisic acid-activated signaling pathway	22/3317	153/76374	8.73227e-07	4.42678e-06	2.14902e-06	BnaA01g04940D/BnaA01g04960D/BnaA03g03090D/BnaA03g03100D/BnaA03g51810D/BnaA04g10140D/BnaA04g11810D/BnaA08g16660D/BnaA09g40600D/BnaA09g55820D/BnaA10g21570D/BnaAnng24980D/BnaC01g06510D/BnaC01g06530D/BnaC02g00180D/BnaC03g04510D/BnaC03g60430D/BnaC04g32260D/BnaC04g33950D/BnaC08g33050D/BnaC08g33530D/BnaC09g45760D	22
biological_process	GO:0010289	homogalacturonan biosynthetic process	8/3317	20/76374	9.88631e-07	4.96583e-06	2.41071e-06	BnaA02g28840D/BnaA04g00880D/BnaA09g38850D/BnaC04g07440D/BnaC04g21950D/BnaC08g31110D/BnaCnng75670D/BnaUnng05030D	8
cellular_component	GO:0042644	chloroplast nucleoid	8/3317	20/76374	9.88631e-07	4.96583e-06	2.41071e-06	BnaA03g13310D/BnaA06g26040D/BnaA09g05370D/BnaA10g05840D/BnaC02g42190D/BnaC03g16120D/BnaC09g04910D/BnaCnng69530D	8
cellular_component	GO:0000323	lytic vacuole	6/3317	10/76374	1.20623e-06	5.94967e-06	2.88833e-06	BnaA02g08340D/BnaA03g10430D/BnaA10g11110D/BnaC03g13120D/BnaC09g53450D/BnaCnng64920D	6
biological_process	GO:0048640	negative regulation of developmental growth	6/3317	10/76374	1.20623e-06	5.94967e-06	2.88833e-06	BnaA01g15170D/BnaA03g47710D/BnaC01g41560D/BnaC06g24760D/BnaC07g39990D/BnaC08g12060D	6
biological_process	GO:0050732	negative regulation of peptidyl-tyrosine phosphorylation	6/3317	10/76374	1.20623e-06	5.94967e-06	2.88833e-06	BnaA01g15170D/BnaA03g47710D/BnaC01g41560D/BnaC06g24760D/BnaC07g39990D/BnaC08g12060D	6
biological_process	GO:0051090	regulation of DNA-binding transcription factor activity	6/3317	10/76374	1.20623e-06	5.94967e-06	2.88833e-06	BnaA05g18020D/BnaA09g18200D/BnaA09g53560D/BnaC05g28450D/BnaC08g07580D/BnaC09g19730D	6
molecular_function	GO:0008173	RNA methyltransferase activity	11/3317	42/76374	1.25218e-06	6.14859e-06	2.98489e-06	BnaA01g18460D/BnaA03g41950D/BnaA07g00910D/BnaA07g19490D/BnaA10g18760D/BnaC03g74200D/BnaC07g01190D/BnaC07g33050D/BnaC09g42480D/BnaCnng27790D/BnaUnng02660D	11
biological_process	GO:0010048	vernalization response	42/3317	433/76374	1.34774e-06	6.58828e-06	3.19835e-06	BnaA02g27250D/BnaA02g29270D/BnaA02g29470D/BnaA02g35530D/BnaA03g03090D/BnaA03g03100D/BnaA03g05650D/BnaA03g16880D/BnaA03g20690D/BnaA04g21150D/BnaA06g07360D/BnaA06g31250D/BnaA06g31620D/BnaA06g39810D/BnaA08g16660D/BnaA08g25130D/BnaA09g02390D/BnaA09g19420D/BnaA10g18480D/BnaA10g21570D/BnaAnng41910D/BnaAnng24980D/BnaC02g00180D/BnaC02g35110D/BnaC02g37330D/BnaC02g37560D/BnaC02g37570D/BnaC03g04510D/BnaC03g…	42
biological_process	GO:0048768	root hair cell tip growth	13/3317	60/76374	1.45253e-06	7.06899e-06	3.43171e-06	BnaA02g04890D/BnaA03g56130D/BnaA09g06920D/BnaA10g15000D/BnaA10g22400D/BnaAnng29480D/BnaC03g10110D/BnaC05g50230D/BnaC09g06420D/BnaC09g37370D/BnaC09g46960D/BnaCnng51610D/BnaUnng03590D	13
biological_process	GO:0010078	maintenance of root meristem identity	10/3317	35/76374	1.59199e-06	7.71341e-06	3.74455e-06	BnaA01g14030D/BnaA02g14990D/BnaA09g31180D/BnaA09g31200D/BnaAnng22030D/BnaAnng22040D/BnaC01g16530D/BnaC02g19980D/BnaC05g18610D/BnaC06g43720D	10
biological_process	GO:0048831	regulation of shoot system development	14/3317	71/76374	1.9266e-06	9.25274e-06	4.49184e-06	BnaA02g29980D/BnaA04g14760D/BnaA06g30400D/BnaA06g34500D/BnaA09g02870D/BnaC02g38380D/BnaC04g56320D/BnaC06g09070D/BnaC07g21210D/BnaC07g21250D/BnaC07g21260D/BnaC07g49160D/BnaC08g10460D/BnaC09g02290D	14
biological_process	GO:0080147	root hair cell development	14/3317	71/76374	1.9266e-06	9.25274e-06	4.49184e-06	BnaA01g06170D/BnaA02g07950D/BnaA03g09960D/BnaA04g14200D/BnaA04g14210D/BnaA09g41470D/BnaA10g29390D/BnaC01g07430D/BnaC02g11040D/BnaC03g12620D/BnaC04g36660D/BnaC04g36670D/BnaC08g34050D/BnaCnng39760D	14
molecular_function	GO:0016844	strictosidine synthase activity	13/3317	62/76374	2.15371e-06	1.02983e-05	4.99942e-06	BnaA04g02940D/BnaA04g02970D/BnaA04g15750D/BnaA07g17130D/BnaA09g36360D/BnaC04g24610D/BnaC04g24620D/BnaC04g24650D/BnaC04g24660D/BnaC04g39030D/BnaC05g15360D/BnaC08g27940D/BnaCnng26110D	13
biological_process	GO:0010082	regulation of root meristem growth	14/3317	72/76374	2.2962e-06	1.09319e-05	5.30701e-06	BnaA04g14760D/BnaA06g18830D/BnaA07g10150D/BnaA07g28990D/BnaA08g20690D/BnaC02g20430D/BnaC03g54740D/BnaC04g56320D/BnaC06g09070D/BnaC06g24400D/BnaC06g43740D/BnaC07g13310D/BnaC08g06140D/BnaC08g10460D	14
biological_process	GO:1900140	regulation of seedling development	7/3317	16/76374	2.34238e-06	1.11035e-05	5.3903e-06	BnaA01g05490D/BnaA06g40640D/BnaA08g16520D/BnaC01g40650D/BnaC01g40660D/BnaC03g60590D/BnaC07g47240D	7
molecular_function	GO:0035251	UDP-glucosyltransferase activity	9/3317	29/76374	2.46781e-06	1.16476e-05	5.65446e-06	BnaA02g20270D/BnaA09g00210D/BnaA09g00220D/BnaAnng24330D/BnaAnng24340D/BnaC02g27750D/BnaC03g31760D/BnaC03g31770D/BnaCnng01870D	9
biological_process	GO:0001736	establishment of planar polarity	6/3317	11/76374	2.55541e-06	1.19071e-05	5.78045e-06	BnaA03g17600D/BnaA04g21830D/BnaA05g06540D/BnaC03g21070D/BnaC04g07210D/BnaC04g45700D	6
biological_process	GO:0002098	tRNA wobble uridine modification	6/3317	11/76374	2.55541e-06	1.19071e-05	5.78045e-06	BnaA05g09210D/BnaA08g06160D/BnaA08g07840D/BnaC04g53860D/BnaC08g09030D/BnaCnng56960D	6
biological_process	GO:0009937	regulation of gibberellic acid mediated signaling pathway	6/3317	11/76374	2.55541e-06	1.19071e-05	5.78045e-06	BnaA02g29980D/BnaA06g30400D/BnaA09g02870D/BnaC02g38380D/BnaC07g49160D/BnaC09g02290D	6
biological_process	GO:0019762	glucosinolate catabolic process	12/3317	55/76374	3.39059e-06	1.57318e-05	7.63714e-06	BnaA01g28080D/BnaA03g34190D/BnaA05g23340D/BnaA05g36910D/BnaA05g36920D/BnaAnng40010D/BnaC01g35320D/BnaC01g35360D/BnaC05g36840D/BnaC05g36860D/BnaC07g11830D/BnaC07g11880D	12
molecular_function	GO:0008559	ATPase-coupled xenobiotic transmembrane transporter activity	8/3317	23/76374	3.42304e-06	1.57489e-05	7.64545e-06	BnaA03g09840D/BnaA04g26870D/BnaA06g39710D/BnaA10g12020D/BnaC03g12470D/BnaC04g00490D/BnaC04g51510D/BnaC07g26150D	8
biological_process	GO:0051782	negative regulation of cell division	8/3317	23/76374	3.42304e-06	1.57489e-05	7.64545e-06	BnaA01g28990D/BnaA03g33770D/BnaA05g20080D/BnaC01g36350D/BnaC03g38960D/BnaC04g34520D/BnaC05g31440D/BnaC05g38460D	8
molecular_function	GO:0017025	TBP-class protein binding	10/3317	38/76374	3.63828e-06	1.66691e-05	8.0922e-06	BnaA03g55460D/BnaA05g13730D/BnaA05g25850D/BnaA08g00420D/BnaAnng01780D/BnaC02g01920D/BnaC03g02670D/BnaC03g70590D/BnaC05g39930D/BnaC06g10970D	10
biological_process	GO:0060548	negative regulation of cell death	7/3317	17/76374	3.83188e-06	1.73801e-05	8.43736e-06	BnaA01g05490D/BnaA06g40640D/BnaA08g16520D/BnaC01g40650D/BnaC01g40660D/BnaC03g60590D/BnaC07g47240D	7
biological_process	GO:0009908	flower development	31/3317	288/76374	3.8391e-06	1.73801e-05	8.43736e-06	BnaA01g34820D/BnaA01g34830D/BnaA02g13010D/BnaA02g20420D/BnaA03g12070D/BnaA03g21550D/BnaA04g13440D/BnaA04g26820D/BnaA05g01030D/BnaA07g25110D/BnaA07g26270D/BnaA08g30700D/BnaA09g03240D/BnaA10g00810D/BnaAnng17880D/BnaC01g06840D/BnaC01g06860D/BnaC01g35300D/BnaC02g17320D/BnaC02g44500D/BnaC03g77300D/BnaC03g71370D/BnaC03g71880D/BnaC03g72370D/BnaC04g00580D/BnaC04g35580D/BnaC04g51560D/BnaC05g00870D/BnaC06g…	31
cellular_component	GO:0010319	stromule	26/3317	219/76374	3.84109e-06	1.73801e-05	8.43736e-06	BnaA01g08290D/BnaA02g09460D/BnaA02g18710D/BnaA02g27980D/BnaA03g11710D/BnaA03g35510D/BnaA05g15910D/BnaA05g19230D/BnaA06g02860D/BnaA07g33900D/BnaA09g13310D/BnaA10g08550D/BnaAnng14300D/BnaC01g09840D/BnaC02g24750D/BnaC03g41300D/BnaC03g71780D/BnaC05g32690D/BnaC05g32750D/BnaC06g03520D/BnaC06g38530D/BnaC07g14000D/BnaC09g13580D/BnaC09g31160D/BnaCnng25790D/BnaCnng73730D	26
molecular_function	GO:0003918	DNA topoisomerase type II (double strand cut, ATP-hydrolyzing) activity	9/3317	31/76374	4.5911e-06	2.06883e-05	1.00433e-05	BnaA01g07750D/BnaA03g55060D/BnaA03g55070D/BnaA05g28510D/BnaA10g26080D/BnaAnng17740D/BnaC03g01570D/BnaC05g42830D/BnaCnng10360D	9
biological_process	GO:0051645	Golgi localization	22/3317	169/76374	4.68354e-06	2.08475e-05	1.01206e-05	BnaA02g04890D/BnaA03g16140D/BnaA03g56130D/BnaA05g08730D/BnaA06g05060D/BnaA08g26800D/BnaA09g15850D/BnaA09g44950D/BnaA10g15000D/BnaC03g10110D/BnaC03g19320D/BnaC04g09870D/BnaC05g06330D/BnaC05g50230D/BnaC08g07170D/BnaC08g37670D/BnaC08g37680D/BnaC09g16350D/BnaC09g37370D/BnaCnng47820D/BnaCnng51610D/BnaUnng05330D	22
biological_process	GO:0051646	mitochondrion localization	22/3317	169/76374	4.68354e-06	2.08475e-05	1.01206e-05	BnaA02g04890D/BnaA03g16140D/BnaA03g56130D/BnaA05g08730D/BnaA06g05060D/BnaA08g26800D/BnaA09g15850D/BnaA09g44950D/BnaA10g15000D/BnaC03g10110D/BnaC03g19320D/BnaC04g09870D/BnaC05g06330D/BnaC05g50230D/BnaC08g07170D/BnaC08g37670D/BnaC08g37680D/BnaC09g16350D/BnaC09g37370D/BnaCnng47820D/BnaCnng51610D/BnaUnng05330D	22
biological_process	GO:0060151	peroxisome localization	22/3317	169/76374	4.68354e-06	2.08475e-05	1.01206e-05	BnaA02g04890D/BnaA03g16140D/BnaA03g56130D/BnaA05g08730D/BnaA06g05060D/BnaA08g26800D/BnaA09g15850D/BnaA09g44950D/BnaA10g15000D/BnaC03g10110D/BnaC03g19320D/BnaC04g09870D/BnaC05g06330D/BnaC05g50230D/BnaC08g07170D/BnaC08g37670D/BnaC08g37680D/BnaC09g16350D/BnaC09g37370D/BnaCnng47820D/BnaCnng51610D/BnaUnng05330D	22
molecular_function	GO:0000774	adenyl-nucleotide exchange factor activity	6/3317	12/76374	4.92166e-06	2.12057e-05	1.02945e-05	BnaA01g15900D/BnaA08g14300D/BnaA08g29730D/BnaC07g40540D/BnaC08g12310D/BnaC08g47050D	6
molecular_function	GO:0004652	polynucleotide adenylyltransferase activity	6/3317	12/76374	4.92166e-06	2.12057e-05	1.02945e-05	BnaA08g22830D/BnaA09g44760D/BnaC07g20650D/BnaC07g48830D/BnaC08g17680D/BnaC08g37460D	6
cellular_component	GO:0009923	fatty acid elongase complex	6/3317	12/76374	4.92166e-06	2.12057e-05	1.02945e-05	BnaA01g15170D/BnaA03g47710D/BnaC01g41560D/BnaC06g24760D/BnaC07g39990D/BnaC08g12060D	6
molecular_function	GO:0016810	hydrolase activity, acting on carbon-nitrogen (but not peptide) bonds	6/3317	12/76374	4.92166e-06	2.12057e-05	1.02945e-05	BnaA03g03750D/BnaA10g20600D/BnaC02g04190D/BnaC02g04200D/BnaC03g05250D/BnaC09g44620D	6
molecular_function	GO:0043425	bHLH transcription factor binding	6/3317	12/76374	4.92166e-06	2.12057e-05	1.02945e-05	BnaA01g08750D/BnaA06g40330D/BnaA09g18160D/BnaC01g10420D/BnaC07g19420D/BnaC09g19610D	6
molecular_function	GO:0080023	3R-hydroxyacyl-CoA dehydratase activity	6/3317	12/76374	4.92166e-06	2.12057e-05	1.02945e-05	BnaA01g15170D/BnaA03g47710D/BnaC01g41560D/BnaC06g24760D/BnaC07g39990D/BnaC08g12060D	6
molecular_function	GO:0008422	beta-glucosidase activity	8/3317	24/76374	4.93832e-06	2.12057e-05	1.02945e-05	BnaA03g30810D/BnaA05g29140D/BnaA05g29150D/BnaA08g06920D/BnaC03g36110D/BnaC05g43610D/BnaC05g43620D/BnaCnng39140D	8
molecular_function	GO:0010279	indole-3-acetic acid amido synthetase activity	8/3317	24/76374	4.93832e-06	2.12057e-05	1.02945e-05	BnaA07g08630D/BnaA08g05580D/BnaA09g27530D/BnaC08g09990D/BnaCnng41890D/BnaCnng41900D/BnaCnng66170D/BnaUnng04720D	8
biological_process	GO:0019464	glycine decarboxylation via glycine cleavage system	8/3317	24/76374	4.93832e-06	2.12057e-05	1.02945e-05	BnaA01g36150D/BnaA03g16100D/BnaA05g08820D/BnaA09g13310D/BnaAnng15720D/BnaC03g19300D/BnaC04g10230D/BnaC09g13580D	8
molecular_function	GO:0018685	alkane 1-monooxygenase activity	7/3317	18/76374	6.03405e-06	2.58097e-05	1.25296e-05	BnaA02g07380D/BnaAnng38120D/BnaAnng17300D/BnaC02g10430D/BnaC02g10440D/BnaC03g12340D/BnaCnng69760D	7
biological_process	GO:0009910	negative regulation of flower development	26/3317	226/76374	6.82768e-06	2.90907e-05	1.41224e-05	BnaA02g19470D/BnaA03g22340D/BnaA04g03960D/BnaA04g03970D/BnaA04g12990D/BnaA04g15930D/BnaA07g13290D/BnaA07g19990D/BnaA09g34520D/BnaA09g42480D/BnaA10g26300D/BnaAnng00810D/BnaC01g41050D/BnaC02g02900D/BnaC02g46530D/BnaC03g01440D/BnaC03g47080D/BnaC03g64560D/BnaC03g71020D/BnaC04g16750D/BnaC04g35060D/BnaC04g39220D/BnaC06g19420D/BnaC08g25470D/BnaC08g34920D/BnaCnng10680D	26
biological_process	GO:0009228	thiamine biosynthetic process	8/3317	25/76374	6.98482e-06	2.96449e-05	1.43914e-05	BnaA02g09460D/BnaA02g27980D/BnaA03g11710D/BnaA08g27360D/BnaA10g08550D/BnaC03g71780D/BnaC08g00140D/BnaC09g31160D	8
biological_process	GO:0006473	protein acetylation	12/3317	59/76374	7.3642e-06	3.11343e-05	1.51145e-05	BnaA01g08290D/BnaA03g35510D/BnaA05g15910D/BnaA05g19230D/BnaA06g02860D/BnaC01g09840D/BnaC03g41300D/BnaC05g32690D/BnaC05g32750D/BnaC06g03520D/BnaCnng25790D/BnaCnng73730D	12
molecular_function	GO:0003691	double-stranded telomeric DNA binding	10/3317	41/76374	7.6586e-06	3.20083e-05	1.55387e-05	BnaA05g13730D/BnaA05g25850D/BnaA08g00420D/BnaAnng01780D/BnaC02g01920D/BnaC03g70590D/BnaC05g39930D/BnaC06g10970D/BnaC06g41680D/BnaC08g45230D	10
biological_process	GO:0009913	epidermal cell differentiation	10/3317	41/76374	7.6586e-06	3.20083e-05	1.55387e-05	BnaA01g07810D/BnaA02g35530D/BnaA08g13510D/BnaAnng41910D/BnaC01g09350D/BnaC08g13430D/BnaCnng69610D/BnaCnng28030D/BnaCnng75540D/BnaCnng17820D	10
biological_process	GO:0009956	radial pattern formation	10/3317	41/76374	7.6586e-06	3.20083e-05	1.55387e-05	BnaA02g03130D/BnaA03g06110D/BnaA08g15740D/BnaA10g17920D/BnaC02g06680D/BnaC03g07850D/BnaC03g61310D/BnaC07g46670D/BnaC09g32160D/BnaCnng54120D	10
biological_process	GO:0016049	cell growth	43/3317	480/76374	7.74043e-06	3.22272e-05	1.5645e-05	BnaA01g21880D/BnaA01g27720D/BnaA03g42230D/BnaA04g26570D/BnaA05g05250D/BnaA05g05280D/BnaA05g23190D/BnaA05g30940D/BnaA06g06010D/BnaA06g34310D/BnaA07g18560D/BnaA07g22180D/BnaA07g23670D/BnaA09g26050D/BnaA09g44950D/BnaA09g47030D/BnaA10g16340D/BnaAnng03220D/BnaAnng36290D/BnaAnng08460D/BnaAnng33030D/BnaC01g28210D/BnaC01g35240D/BnaC02g08260D/BnaC03g39700D/BnaC04g04660D/BnaC04g04680D/BnaC04g50600D/BnaC05g…	43
biological_process	GO:0019388	galactose catabolic process	6/3317	13/76374	8.80221e-06	3.63714e-05	1.76569e-05	BnaA02g18710D/BnaA07g33900D/BnaAnng14300D/BnaC02g24750D/BnaC06g38530D/BnaC07g14000D	6
biological_process	GO:0048442	sepal development	6/3317	13/76374	8.80221e-06	3.63714e-05	1.76569e-05	BnaA02g27250D/BnaA06g39810D/BnaA09g19420D/BnaC02g35110D/BnaC07g22490D/BnaC09g22090D	6
biological_process	GO:0009607	response to biotic stimulus	13/3317	70/76374	8.89938e-06	3.66347e-05	1.77847e-05	BnaA01g31900D/BnaA04g19660D/BnaA06g34860D/BnaAnng32670D/BnaAnng32860D/BnaC01g38730D/BnaC03g62100D/BnaC03g76760D/BnaC04g44040D/BnaC07g48800D/BnaC09g52200D/BnaCnng51700D/BnaCnng53390D	13
biological_process	GO:0080144	amino acid homeostasis	7/3317	19/76374	9.19411e-06	3.77062e-05	1.83049e-05	BnaA07g20300D/BnaA10g26730D/BnaAnng18440D/BnaC02g03290D/BnaC02g25850D/BnaC06g19790D/BnaCnng03010D	7
biological_process	GO:0010374	stomatal complex development	8/3317	26/76374	9.70399e-06	3.94012e-05	1.91277e-05	BnaA01g21880D/BnaA03g34390D/BnaA05g22950D/BnaA06g06010D/BnaC01g28210D/BnaC03g39830D/BnaC05g07560D/BnaC05g36390D	8
biological_process	GO:0080113	regulation of seed growth	8/3317	26/76374	9.70399e-06	3.94012e-05	1.91277e-05	BnaA03g16140D/BnaA04g14760D/BnaA05g08730D/BnaC03g19320D/BnaC04g09870D/BnaC04g56320D/BnaC06g09070D/BnaC08g10460D	8
biological_process	GO:0009864	induced systemic resistance, jasmonic acid mediated signaling pathway	11/3317	51/76374	9.71537e-06	3.94012e-05	1.91277e-05	BnaA04g03040D/BnaA04g23860D/BnaA05g02160D/BnaA07g17180D/BnaA09g36500D/BnaC02g38200D/BnaC04g01830D/BnaC04g24530D/BnaC04g47620D/BnaC08g28070D/BnaCnng07590D	11
biological_process	GO:0048519	negative regulation of biological process	18/3317	128/76374	1.14154e-05	4.61249e-05	2.23918e-05	BnaA02g16500D/BnaA03g23610D/BnaA04g07950D/BnaA04g19890D/BnaA05g09790D/BnaA06g11180D/BnaA07g25390D/BnaA08g17390D/BnaA09g26170D/BnaC02g22310D/BnaC03g28030D/BnaC03g59640D/BnaC06g27170D/BnaC08g06320D/BnaCnng25410D/BnaCnng76990D/BnaCnng05140D/BnaCnng59830D	18
cellular_component	GO:0009534	chloroplast thylakoid	28/3317	261/76374	1.17058e-05	4.71244e-05	2.2877e-05	BnaA01g08290D/BnaA02g35040D/BnaA03g35510D/BnaA04g22200D/BnaA05g06370D/BnaA05g15910D/BnaA05g19230D/BnaA05g33390D/BnaA06g02860D/BnaA06g07360D/BnaA06g30380D/BnaA07g33040D/BnaA09g13310D/BnaAnng12670D/BnaC01g09840D/BnaC02g06570D/BnaC03g41300D/BnaC04g06630D/BnaC04g45930D/BnaC05g32690D/BnaC05g32750D/BnaC06g03520D/BnaC06g37580D/BnaC07g26290D/BnaC09g13580D/BnaCnng25790D/BnaCnng73730D/BnaCnng05900D	28
cellular_component	GO:0016328	lateral plasma membrane	8/3317	27/76374	1.32637e-05	5.32005e-05	2.58267e-05	BnaA07g10150D/BnaA07g28990D/BnaA08g20690D/BnaC02g20430D/BnaC06g24400D/BnaC06g43740D/BnaC07g13310D/BnaC08g06140D	8
cellular_component	GO:0043078	polar nucleus	9/3317	35/76374	1.37373e-05	5.4899e-05	2.66513e-05	BnaA02g21200D/BnaA03g16140D/BnaA05g08730D/BnaA05g31430D/BnaAnng16690D/BnaC02g26190D/BnaC03g19320D/BnaC04g09870D/BnaC05g45960D	9
molecular_function	GO:0000822	inositol hexakisphosphate binding	6/3317	14/76374	1.48347e-05	5.9069e-05	2.86756e-05	BnaA04g00230D/BnaA07g19520D/BnaA09g40340D/BnaC06g43000D/BnaC08g32660D/BnaCnng60850D	6
biological_process	GO:0003002	regionalization	13/3317	74/76374	1.66922e-05	6.62244e-05	3.21493e-05	BnaA01g27720D/BnaA03g42230D/BnaA05g23190D/BnaA06g27100D/BnaA09g04800D/BnaAnng33030D/BnaC01g35240D/BnaC03g39700D/BnaC05g36590D/BnaC06g07540D/BnaC06g07570D/BnaC07g29850D/BnaCnng69150D	13
molecular_function	GO:0003779	actin binding	24/3317	210/76374	1.68837e-05	6.67425e-05	3.24009e-05	BnaA01g02640D/BnaA02g04890D/BnaA03g52870D/BnaA03g56130D/BnaA06g05060D/BnaA08g11150D/BnaA08g26800D/BnaA09g15850D/BnaA09g44950D/BnaA10g07470D/BnaC01g03880D/BnaC02g15240D/BnaC03g10110D/BnaC03g66050D/BnaC05g06330D/BnaC05g50230D/BnaC08g07170D/BnaC08g37670D/BnaC08g37680D/BnaC09g16350D/BnaC09g28350D/BnaCnng47820D/BnaCnng51610D/BnaUnng05330D	24
biological_process	GO:0050826	response to freezing	38/3317	418/76374	1.82637e-05	7.19379e-05	3.4923e-05	BnaA02g18130D/BnaA02g26510D/BnaA03g18330D/BnaA03g51290D/BnaA05g08020D/BnaA05g10850D/BnaA06g12580D/BnaA06g18830D/BnaA06g34100D/BnaA07g21350D/BnaA07g27740D/BnaA07g32820D/BnaA08g12690D/BnaA08g22640D/BnaA09g26050D/BnaA09g47030D/BnaAnng36290D/BnaAnng07530D/BnaC01g07310D/BnaC01g14560D/BnaC02g24120D/BnaC02g34690D/BnaC03g21850D/BnaC03g54740D/BnaC03g77370D/BnaC04g09030D/BnaC04g12390D/BnaC05g14140D/BnaC05g…	38
biological_process	GO:0009729	detection of brassinosteroid stimulus	7/3317	21/76374	1.96507e-05	7.71238e-05	3.74406e-05	BnaA01g05490D/BnaA06g40640D/BnaA08g16520D/BnaC01g40650D/BnaC01g40660D/BnaC03g60590D/BnaC07g47240D	7
biological_process	GO:0009637	response to blue light	37/3317	404/76374	1.98847e-05	7.77633e-05	3.7751e-05	BnaA02g08340D/BnaA02g09460D/BnaA02g16500D/BnaA02g27980D/BnaA02g29470D/BnaA03g02610D/BnaA03g05650D/BnaA03g10430D/BnaA03g11710D/BnaA03g16880D/BnaA04g20290D/BnaA04g21150D/BnaA05g09150D/BnaA05g11140D/BnaA06g31250D/BnaA09g02390D/BnaA10g08550D/BnaA10g11110D/BnaA10g18480D/BnaAnng06020D/BnaC02g01060D/BnaC02g22310D/BnaC02g37560D/BnaC02g37570D/BnaC03g07350D/BnaC03g13120D/BnaC03g20400D/BnaC03g71780D/BnaC04g…	37
biological_process	GO:0048513	animal organ development	13/3317	76/76374	2.24683e-05	8.75545e-05	4.25042e-05	BnaA01g04870D/BnaA02g00810D/BnaA02g32110D/BnaA03g03190D/BnaA03g51900D/BnaA06g27560D/BnaA06g34310D/BnaC01g06410D/BnaC02g40790D/BnaC03g04580D/BnaC07g21520D/BnaC07g29530D/BnaCnng20070D	13
biological_process	GO:0006086	acetyl-CoA biosynthetic process from pyruvate	6/3317	15/76374	2.38116e-05	9.246e-05	4.48856e-05	BnaA02g11520D/BnaA03g13490D/BnaA10g05930D/BnaC02g16000D/BnaC03g16370D/BnaC09g26770D	6
biological_process	GO:0048449	floral organ formation	30/3317	301/76374	2.43609e-05	9.42286e-05	4.57442e-05	BnaA01g24520D/BnaA01g27720D/BnaA02g26510D/BnaA03g36790D/BnaA03g42230D/BnaA03g51290D/BnaA04g11060D/BnaA05g16930D/BnaA05g23190D/BnaA06g27100D/BnaA06g34100D/BnaA08g12690D/BnaA09g04800D/BnaAnng33030D/BnaC01g07310D/BnaC01g14560D/BnaC01g35240D/BnaC02g34690D/BnaC03g39700D/BnaC03g42960D/BnaC03g77370D/BnaC05g36590D/BnaC06g07540D/BnaC06g07570D/BnaC07g21800D/BnaC07g29850D/BnaCnng69150D/BnaCnng27630D/BnaCnng…	30
biological_process	GO:0010492	maintenance of shoot apical meristem identity	12/3317	66/76374	2.44392e-05	9.42286e-05	4.57442e-05	BnaA01g00290D/BnaA08g15790D/BnaA09g06920D/BnaA10g22400D/BnaAnng29480D/BnaC01g01290D/BnaC03g61270D/BnaC07g46770D/BnaC09g06420D/BnaC09g46960D/BnaCnng72090D/BnaUnng03590D	12
biological_process	GO:0010220	positive regulation of vernalization response	5/3317	10/76374	3.2314e-05	0.00012372	6.00609e-05	BnaA03g51290D/BnaA08g12690D/BnaC01g07310D/BnaC01g14560D/BnaC03g77370D	5
molecular_function	GO:0019204	obsolete nucleotide phosphatase activity	5/3317	10/76374	3.2314e-05	0.00012372	6.00609e-05	BnaA01g11500D/BnaA03g44810D/BnaA08g09620D/BnaC03g64030D/BnaC07g36800D	5
molecular_function	GO:0008131	primary amine oxidase activity	12/3317	68/76374	3.33615e-05	0.000127285	6.17919e-05	BnaA01g07220D/BnaA02g08420D/BnaA03g49640D/BnaA09g12680D/BnaA10g28940D/BnaC01g08790D/BnaC02g47630D/BnaC07g50830D/BnaC09g13010D/BnaC09g33450D/BnaCnng33720D/BnaCnng41060D	12
biological_process	GO:0009610	response to symbiotic fungus	22/3317	192/76374	3.56894e-05	0.000135694	6.58741e-05	BnaA02g27290D/BnaA02g27300D/BnaA03g30810D/BnaA05g29140D/BnaA05g29150D/BnaA07g38860D/BnaA08g06920D/BnaA09g53480D/BnaA09g53490D/BnaAnng13870D/BnaC02g35150D/BnaC02g35160D/BnaC03g36110D/BnaC05g43610D/BnaC05g43620D/BnaC06g24600D/BnaC06g43670D/BnaC09g22120D/BnaC09g52480D/BnaC09g52360D/BnaCnng39140D/BnaCnng56120D	22
molecular_function	GO:0004375	glycine dehydrogenase (decarboxylating) activity	6/3317	16/76374	3.66932e-05	0.000138548	6.72597e-05	BnaA01g36150D/BnaA03g16100D/BnaA05g08820D/BnaAnng15720D/BnaC03g19300D/BnaC04g10230D	6
biological_process	GO:0051603	proteolysis involved in cellular protein catabolic process	6/3317	16/76374	3.66932e-05	0.000138548	6.72597e-05	BnaA01g18740D/BnaA05g35360D/BnaA08g05650D/BnaC01g22500D/BnaC06g11390D/BnaC08g10150D	6
molecular_function	GO:0004386	helicase activity	18/3317	140/76374	3.91362e-05	0.000147265	7.14914e-05	BnaA03g58950D/BnaA05g30940D/BnaA09g34200D/BnaA09g34210D/BnaA09g50860D/BnaA10g16340D/BnaAnng03220D/BnaAnng08460D/BnaC02g08260D/BnaC04g18720D/BnaC04g26380D/BnaC04g26390D/BnaC04g26400D/BnaC05g45420D/BnaC07g41400D/BnaC08g25110D/BnaC08g45510D/BnaC09g39190D	18
biological_process	GO:0006281	DNA repair	34/3317	371/76374	4.15417e-05	0.000155781	7.56257e-05	BnaA03g04760D/BnaA03g58950D/BnaA04g05130D/BnaA07g15850D/BnaA08g27000D/BnaA08g27870D/BnaA08g28200D/BnaA09g06920D/BnaA09g33270D/BnaA09g50410D/BnaA10g02550D/BnaA10g03210D/BnaA10g19490D/BnaA10g22400D/BnaAnng29480D/BnaC03g06300D/BnaC04g12390D/BnaC05g02520D/BnaC05g03200D/BnaC05g03220D/BnaC06g14240D/BnaC07g41400D/BnaC08g00670D/BnaC08g12460D/BnaC08g24080D/BnaC08g36440D/BnaC08g44060D/BnaC08g46380D/BnaC09g…	34
biological_process	GO:0010074	maintenance of meristem identity	17/3317	128/76374	4.18283e-05	0.000156321	7.58875e-05	BnaA01g35820D/BnaA02g19470D/BnaA03g51290D/BnaA06g18830D/BnaA07g19990D/BnaA08g12690D/BnaA09g14430D/BnaA09g14440D/BnaC01g07310D/BnaC01g14560D/BnaC01g28350D/BnaC02g46530D/BnaC03g54740D/BnaC03g77370D/BnaC04g18720D/BnaC06g19420D/BnaC09g15030D	17
molecular_function	GO:0015035	protein disulfide oxidoreductase activity	28/3317	280/76374	4.20377e-05	0.000156569	7.6008e-05	BnaA02g35040D/BnaA03g01100D/BnaA03g01110D/BnaA03g21800D/BnaA03g27200D/BnaA05g00500D/BnaA05g33390D/BnaA07g04200D/BnaA07g16540D/BnaA07g33040D/BnaA09g34730D/BnaA09g55010D/BnaAnng12670D/BnaAnng00840D/BnaC01g25910D/BnaC02g02860D/BnaC02g06570D/BnaC03g01470D/BnaC03g01480D/BnaC03g26070D/BnaC03g32200D/BnaC04g27450D/BnaC04g51940D/BnaC06g15480D/BnaC06g37580D/BnaC08g25690D/BnaC08g25810D/BnaCnng05900D	28
biological_process	GO:0008284	positive regulation of cell population proliferation	30/3317	310/76374	4.2298e-05	0.000157004	7.62194e-05	BnaA03g04760D/BnaA05g30940D/BnaA06g08740D/BnaA06g27100D/BnaA07g18560D/BnaA07g38860D/BnaA09g04800D/BnaA09g06920D/BnaA09g38160D/BnaA09g57150D/BnaA10g16340D/BnaA10g19490D/BnaA10g22400D/BnaAnng03220D/BnaAnng08460D/BnaAnng10600D/BnaC02g08260D/BnaC03g06300D/BnaC05g10050D/BnaC05g45420D/BnaC05g47070D/BnaC06g17590D/BnaC06g24600D/BnaC06g43670D/BnaC07g29850D/BnaC08g40210D/BnaC09g06420D/BnaC09g39190D/BnaC09g…	30
biological_process	GO:0043900	regulation of multi-organism process	40/3317	469/76374	4.74695e-05	0.000175605	8.52493e-05	BnaA01g27640D/BnaA02g02290D/BnaA02g27290D/BnaA02g27300D/BnaA02g32460D/BnaA02g32480D/BnaA03g01690D/BnaA03g34270D/BnaA03g40730D/BnaA05g23160D/BnaA06g09880D/BnaA06g17500D/BnaA06g27000D/BnaA08g31540D/BnaA09g34470D/BnaA09g53480D/BnaA09g53490D/BnaA10g24820D/BnaAnng13870D/BnaC02g05730D/BnaC02g35150D/BnaC02g35160D/BnaC02g41200D/BnaC03g02240D/BnaC03g39740D/BnaC05g11500D/BnaC07g29940D/BnaC07g31660D/BnaC08g…	40
molecular_function	GO:0009927	histidine phosphotransfer kinase activity	8/3317	32/76374	5.17496e-05	0.000190794	9.26229e-05	BnaA06g38270D/BnaA07g38280D/BnaA08g24970D/BnaA09g47410D/BnaC05g49420D/BnaC06g43070D/BnaC08g15300D/BnaC08g41590D	8
biological_process	GO:0009647	skotomorphogenesis	6/3317	17/76374	5.46175e-05	0.000200692	9.74279e-05	BnaA04g26180D/BnaA04g26850D/BnaA05g04850D/BnaC04g04190D/BnaC04g50180D/BnaC04g51520D	6
molecular_function	GO:0004609	phosphatidylserine decarboxylase activity	5/3317	11/76374	5.71127e-05	0.000208153	0.00010105	BnaAnng13400D/BnaC01g20050D/BnaC04g27550D/BnaC09g30650D/BnaCnng14450D	5
cellular_component	GO:0005672	transcription factor TFIIA complex	5/3317	11/76374	5.71127e-05	0.000208153	0.00010105	BnaA08g28950D/BnaA09g49410D/BnaA10g04870D/BnaC08g02230D/BnaC08g45360D	5
molecular_function	GO:0008134	transcription factor binding	11/3317	61/76374	5.72184e-05	0.000208153	0.00010105	BnaA01g00160D/BnaA05g20080D/BnaA06g10250D/BnaA08g15900D/BnaA09g57140D/BnaC01g01080D/BnaC03g61140D/BnaC05g11920D/BnaC05g31440D/BnaC08g38810D/BnaCnng64580D	11
biological_process	GO:0006333	chromatin assembly or disassembly	21/3317	185/76374	6.0895e-05	0.000220795	0.000107187	BnaA01g37280D/BnaA02g21680D/BnaA03g21110D/BnaA03g41520D/BnaA07g09980D/BnaA07g27740D/BnaA07g38010D/BnaA09g21570D/BnaA09g31050D/BnaA09g32400D/BnaAnng40070D/BnaC03g25170D/BnaC03g55210D/BnaC04g50150D/BnaC05g18750D/BnaC06g16230D/BnaC07g13110D/BnaC07g32570D/BnaCnng08430D/BnaCnng61410D/BnaCnng67520D	21
biological_process	GO:0016579	protein deubiquitination	25/3317	242/76374	6.2304e-05	0.000225158	0.000109305	BnaA01g35820D/BnaA03g43080D/BnaA05g10850D/BnaA06g18830D/BnaA08g27000D/BnaA08g28200D/BnaA09g14430D/BnaA09g14440D/BnaA09g50410D/BnaA10g03210D/BnaAnng23540D/BnaC01g28350D/BnaC03g54740D/BnaC04g12390D/BnaC04g18720D/BnaC05g03200D/BnaC05g03220D/BnaC07g34350D/BnaC08g12460D/BnaC08g36440D/BnaC08g44060D/BnaC08g46380D/BnaC09g15030D/BnaC09g49220D/BnaCnng68370D	25
biological_process	GO:0010029	regulation of seed germination	20/3317	174/76374	7.56501e-05	0.00027249	0.000132283	BnaA02g02470D/BnaA03g34390D/BnaA04g14760D/BnaA05g22950D/BnaA06g17280D/BnaA06g34500D/BnaA10g29750D/BnaC03g39830D/BnaC03g57070D/BnaC04g56320D/BnaC05g36390D/BnaC06g09070D/BnaC07g21210D/BnaC07g21250D/BnaC07g21260D/BnaC08g10460D/BnaCnng69120D/BnaCnng35390D/BnaCnng35410D/BnaCnng42590D	20
biological_process	GO:0009954	proximal/distal pattern formation	11/3317	63/76374	7.78218e-05	0.000279393	0.000135634	BnaA04g03040D/BnaA04g23860D/BnaA05g02160D/BnaA07g17180D/BnaA09g36500D/BnaC02g38200D/BnaC04g01830D/BnaC04g24530D/BnaC04g47620D/BnaC08g28070D/BnaCnng07590D	11
biological_process	GO:0051302	regulation of cell division	20/3317	175/76374	8.19639e-05	0.000293302	0.000142387	BnaA01g15170D/BnaA01g24520D/BnaA03g36790D/BnaA03g47710D/BnaA05g16930D/BnaA06g16860D/BnaA07g34360D/BnaAnng14940D/BnaAnng14950D/BnaC01g41560D/BnaC03g42960D/BnaC03g70510D/BnaC06g24760D/BnaC06g39190D/BnaC07g39990D/BnaC08g12060D/BnaCnng69880D/BnaCnng27630D/BnaCnng43520D/BnaCnng12060D	20
molecular_function	GO:0080130	L-phenylalanine:2-oxoglutarate aminotransferase activity	8/3317	34/76374	8.26648e-05	0.000294847	0.000143136	BnaA02g14990D/BnaA09g31180D/BnaA09g31200D/BnaAnng22030D/BnaAnng22040D/BnaC02g19980D/BnaC05g18610D/BnaC06g43720D	8
biological_process	GO:0009567	double fertilization forming a zygote and endosperm	14/3317	98/76374	8.72795e-05	0.000310296	0.000150636	BnaA02g03860D/BnaA03g21800D/BnaA03g22940D/BnaA05g00500D/BnaAnng18590D/BnaC01g08030D/BnaC02g07720D/BnaC02g48720D/BnaC03g26070D/BnaC03g27010D/BnaC04g27450D/BnaC04g51940D/BnaC09g39750D/BnaCnng40110D	14
biological_process	GO:0009060	aerobic respiration	20/3317	176/76374	8.87403e-05	0.000314468	0.000152662	BnaA01g31350D/BnaA02g02470D/BnaA02g11520D/BnaA03g13490D/BnaA05g28000D/BnaA05g28020D/BnaA09g35800D/BnaA10g05930D/BnaA10g29750D/BnaAnng03370D/BnaC01g23900D/BnaC02g16000D/BnaC03g16370D/BnaC05g42240D/BnaC08g27300D/BnaC09g26770D/BnaCnng69120D/BnaCnng35390D/BnaCnng35410D/BnaCnng42590D	20
biological_process	GO:0006662	glycerol ether metabolic process	16/3317	123/76374	8.9407e-05	0.000314793	0.00015282	BnaA02g35040D/BnaA03g21800D/BnaA05g00500D/BnaA05g33390D/BnaA07g04200D/BnaA07g33040D/BnaA09g55010D/BnaAnng12670D/BnaC01g25910D/BnaC02g06570D/BnaC03g26070D/BnaC04g27450D/BnaC04g51940D/BnaC06g37580D/BnaC08g25810D/BnaCnng05900D	16
biological_process	GO:0010305	leaf vascular tissue pattern formation	16/3317	123/76374	8.9407e-05	0.000314793	0.00015282	BnaA04g03960D/BnaA04g03970D/BnaA06g05600D/BnaA06g14040D/BnaA06g18830D/BnaA07g11660D/BnaA08g26200D/BnaA08g31250D/BnaA09g34520D/BnaC03g54740D/BnaC05g07140D/BnaC05g15390D/BnaC07g48490D/BnaC08g13800D/BnaC08g19040D/BnaC08g25470D	16
biological_process	GO:0010268	brassinosteroid homeostasis	7/3317	26/76374	9.18116e-05	0.000322223	0.000156427	BnaA01g05490D/BnaA06g40640D/BnaA08g16520D/BnaC01g40650D/BnaC01g40660D/BnaC03g60590D/BnaC07g47240D	7
biological_process	GO:0030261	chromosome condensation	5/3317	12/76374	9.43921e-05	0.000330222	0.000160309	BnaA04g18890D/BnaA05g35190D/BnaC04g12240D/BnaC04g43100D/BnaC04g43110D	5
biological_process	GO:0009631	cold acclimation	15/3317	111/76374	9.48007e-05	0.000330595	0.000160491	BnaA01g01560D/BnaA01g32510D/BnaA03g29780D/BnaA04g11900D/BnaA05g30520D/BnaA07g02430D/BnaA09g43450D/BnaAnng26260D/BnaAnng08360D/BnaC03g35020D/BnaC04g16180D/BnaC05g44970D/BnaC07g11440D/BnaCnng30150D/BnaCnng42010D	15
molecular_function	GO:0004838	L-tyrosine:2-oxoglutarate aminotransferase activity	8/3317	35/76374	0.000103088	0.000358353	0.000173966	BnaA02g14990D/BnaA09g31180D/BnaA09g31200D/BnaAnng22030D/BnaAnng22040D/BnaC02g19980D/BnaC05g18610D/BnaC06g43720D	8
biological_process	GO:0006417	regulation of translation	15/3317	112/76374	0.000105106	0.000364213	0.000176811	BnaA01g07810D/BnaA01g09160D/BnaA01g29050D/BnaA03g33680D/BnaA03g58260D/BnaA05g16680D/BnaA05g24520D/BnaA08g13510D/BnaC01g09350D/BnaC01g36430D/BnaC01g40850D/BnaC03g38850D/BnaC07g35270D/BnaC08g13430D/BnaCnng59700D	15
biological_process	GO:0048579	negative regulation of long-day photoperiodism, flowering	6/3317	19/76374	0.000111085	0.000383718	0.00018628	BnaA02g30480D/BnaA06g39620D/BnaA09g03180D/BnaC02g38810D/BnaC07g26830D/BnaC09g02610D	6
molecular_function	GO:0004715	non-membrane spanning protein tyrosine kinase activity	7/3317	27/76374	0.000119303	0.000410809	0.000199431	BnaA01g22720D/BnaA03g60290D/BnaAnng20210D/BnaAnng20220D/BnaC01g29600D/BnaC09g51390D/BnaC09g51400D	7
cellular_component	GO:0000793	condensed chromosome	5/3317	13/76374	0.000147886	0.000506047	0.000245666	BnaA04g18890D/BnaA05g35190D/BnaC04g12240D/BnaC04g43100D/BnaC04g43110D	5
molecular_function	GO:0008020	G protein-coupled photoreceptor activity	5/3317	13/76374	0.000147886	0.000506047	0.000245666	BnaA03g34390D/BnaA05g22950D/BnaC03g39830D/BnaC05g36390D/BnaC08g10540D	5
biological_process	GO:0009595	detection of biotic stimulus	38/3317	462/76374	0.00015211	0.000518879	0.000251895	BnaA01g27640D/BnaA02g02290D/BnaA02g27290D/BnaA02g27300D/BnaA02g32460D/BnaA02g32480D/BnaA03g01690D/BnaA03g34270D/BnaA03g40730D/BnaA05g23160D/BnaA06g09880D/BnaA06g17500D/BnaA06g27000D/BnaA08g31540D/BnaA09g53480D/BnaA09g53490D/BnaA10g24820D/BnaAnng13870D/BnaC02g05730D/BnaC02g35150D/BnaC02g35160D/BnaC02g41200D/BnaC03g02240D/BnaC03g39740D/BnaC05g11500D/BnaC07g29940D/BnaC07g31660D/BnaC08g14830D/BnaC08g…	38
molecular_function	GO:0043047	single-stranded telomeric DNA binding	6/3317	20/76374	0.00015286	0.000519817	0.000252351	BnaA05g13730D/BnaA08g00420D/BnaC03g70590D/BnaC05g39930D/BnaC06g10970D/BnaC06g41680D	6
biological_process	GO:0006265	DNA topological change	9/3317	47/76374	0.000165619	0.000561465	0.000272569	BnaA01g07750D/BnaA03g55060D/BnaA03g55070D/BnaA05g28510D/BnaA10g26080D/BnaAnng17740D/BnaC03g01570D/BnaC05g42830D/BnaCnng10360D	9
biological_process	GO:0016571	histone methylation	23/3317	228/76374	0.000170799	0.000577239	0.000280226	BnaA01g35820D/BnaA03g43080D/BnaA05g10850D/BnaA08g27000D/BnaA08g28200D/BnaA09g14430D/BnaA09g14440D/BnaA09g50410D/BnaA10g03210D/BnaAnng23540D/BnaC01g28350D/BnaC04g12390D/BnaC04g18720D/BnaC05g03200D/BnaC05g03220D/BnaC07g34350D/BnaC08g12460D/BnaC08g36440D/BnaC08g44060D/BnaC08g46380D/BnaC09g15030D/BnaC09g49220D/BnaCnng68370D	23
molecular_function	GO:0000156	phosphorelay response regulator activity	18/3317	157/76374	0.000174441	0.000587733	0.000285321	BnaA02g07870D/BnaA03g03090D/BnaA03g03100D/BnaA04g14760D/BnaA06g34500D/BnaA10g21570D/BnaAnng24980D/BnaC02g00180D/BnaC02g10950D/BnaC02g10960D/BnaC03g04510D/BnaC04g56320D/BnaC06g09070D/BnaC07g21210D/BnaC07g21250D/BnaC07g21260D/BnaC08g10460D/BnaC09g45760D	18
biological_process	GO:0042761	very long-chain fatty acid biosynthetic process	8/3317	38/76374	0.000190733	0.000640652	0.000311011	BnaA01g15170D/BnaA03g47710D/BnaA07g04820D/BnaC01g41560D/BnaC06g24760D/BnaC07g39990D/BnaC08g12060D/BnaCnng00400D	8
biological_process	GO:0032508	DNA duplex unwinding	12/3317	81/76374	0.000192509	0.000644641	0.000312947	BnaA01g01560D/BnaA04g11900D/BnaA07g02430D/BnaA09g43450D/BnaA09g55820D/BnaAnng26260D/BnaAnng08360D/BnaC04g16180D/BnaC07g11440D/BnaC08g33530D/BnaCnng30150D/BnaCnng42010D	12
molecular_function	GO:0004866	endopeptidase inhibitor activity	7/3317	29/76374	0.000194288	0.000648613	0.000314876	BnaA07g22750D/BnaA07g30710D/BnaC06g23690D/BnaC06g23700D/BnaC06g34170D/BnaC06g34210D/BnaC06g34250D	7
biological_process	GO:0009062	fatty acid catabolic process	21/3317	201/76374	0.000198013	0.000659039	0.000319937	BnaA05g08190D/BnaA05g10850D/BnaA05g32630D/BnaA05g32640D/BnaA06g21560D/BnaA08g20500D/BnaA08g20510D/BnaA09g19860D/BnaA09g31100D/BnaA10g17240D/BnaAnng07660D/BnaAnng30720D/BnaC04g09240D/BnaC04g12390D/BnaC05g18670D/BnaC05g47760D/BnaC05g47770D/BnaC08g06320D/BnaC09g21860D/BnaC09g40420D/BnaCnng70390D	21
molecular_function	GO:0004488	methylenetetrahydrofolate dehydrogenase (NADP+) activity	5/3317	14/76374	0.000221803	0.000733759	0.000356211	BnaA03g32210D/BnaA05g26750D/BnaC03g37500D/BnaC05g40770D/BnaCnng22920D	5
molecular_function	GO:0008728	GTP diphosphokinase activity	5/3317	14/76374	0.000221803	0.000733759	0.000356211	BnaA01g06400D/BnaA08g24490D/BnaA09g46750D/BnaC03g56980D/BnaC08g40820D	5
molecular_function	GO:0008327	methyl-CpG binding	9/3317	49/76374	0.000230936	0.00076167	0.000369761	BnaA01g28500D/BnaA07g10550D/BnaA08g23900D/BnaA09g56750D/BnaC01g35800D/BnaC05g11640D/BnaC07g13810D/BnaC08g16590D/BnaC08g38940D	9
molecular_function	GO:0015171	amino acid transmembrane transporter activity	18/3317	161/76374	0.00023912	0.000786296	0.000381716	BnaA02g18200D/BnaA03g17600D/BnaA03g23150D/BnaA04g21830D/BnaA05g06540D/BnaA07g20880D/BnaA09g23810D/BnaA09g23820D/BnaA09g43460D/BnaAnng28100D/BnaAnng28110D/BnaC03g21070D/BnaC04g07210D/BnaC04g45700D/BnaC06g20740D/BnaC08g36050D/BnaCnng74340D/BnaCnng11320D	18
cellular_component	GO:0005795	Golgi stack	14/3317	108/76374	0.000249608	0.000818325	0.000397264	BnaA01g27720D/BnaA02g33830D/BnaA03g42230D/BnaA05g23190D/BnaA06g22790D/BnaAnng33030D/BnaC01g35240D/BnaC02g42610D/BnaC03g39700D/BnaC03g50710D/BnaC05g36590D/BnaC06g07540D/BnaC06g07570D/BnaCnng69150D	14
molecular_function	GO:0003756	protein disulfide isomerase activity	11/3317	72/76374	0.000267098	0.000873051	0.000423831	BnaA03g21800D/BnaA03g27200D/BnaA05g00500D/BnaA05g20980D/BnaA09g55010D/BnaC03g26070D/BnaC03g32200D/BnaC04g27450D/BnaC04g51940D/BnaC05g33720D/BnaC08g25810D	11
cellular_component	GO:0005960	glycine cleavage complex	6/3317	22/76374	0.000273045	0.000889834	0.000431979	BnaA01g36150D/BnaA03g16100D/BnaA05g08820D/BnaAnng15720D/BnaC03g19300D/BnaC04g10230D	6
biological_process	GO:0009789	positive regulation of abscisic acid-activated signaling pathway	14/3317	109/76374	0.000275074	0.000893787	0.000433898	BnaA01g08290D/BnaA03g35510D/BnaA05g15910D/BnaA05g19230D/BnaA06g02860D/BnaA09g40600D/BnaC01g09840D/BnaC03g41300D/BnaC05g32690D/BnaC05g32750D/BnaC06g03520D/BnaC08g33050D/BnaCnng25790D/BnaCnng73730D	14
biological_process	GO:0007267	cell-cell signaling	31/3317	362/76374	0.000294705	0.000954739	0.000463488	BnaA01g04480D/BnaA01g22700D/BnaA02g02030D/BnaA02g16200D/BnaA03g18330D/BnaA03g52120D/BnaA03g54930D/BnaA04g10100D/BnaA06g12580D/BnaA07g04970D/BnaA07g22900D/BnaA08g12150D/BnaA08g22640D/BnaA09g13680D/BnaA09g13690D/BnaA10g27410D/BnaAnng29380D/BnaC01g05930D/BnaC01g29540D/BnaC02g03640D/BnaC02g21680D/BnaC03g00520D/BnaC03g21850D/BnaC03g67130D/BnaC05g14140D/BnaC06g23880D/BnaC08g17980D/BnaC09g51360D/BnaCnng…	31
biological_process	GO:0006084	acetyl-CoA metabolic process	29/3317	330/76374	0.000296418	0.000957456	0.000464807	BnaA01g17490D/BnaA01g25880D/BnaA02g18200D/BnaA03g07550D/BnaA05g15860D/BnaA05g19350D/BnaA06g02910D/BnaA06g14200D/BnaA06g21560D/BnaA07g20880D/BnaA08g02140D/BnaA09g19860D/BnaA10g15770D/BnaAnng14740D/BnaC01g21820D/BnaC01g33070D/BnaC03g09570D/BnaC03g68620D/BnaC05g15570D/BnaC05g26480D/BnaC05g26490D/BnaC05g32840D/BnaC06g03410D/BnaC06g03450D/BnaC06g20740D/BnaC07g14860D/BnaC09g21860D/BnaC09g38350D/BnaCnng…	29
biological_process	GO:0080027	response to herbivore	10/3317	62/76374	0.000320184	0.00102712	0.000498625	BnaA01g28080D/BnaA05g23340D/BnaA05g36910D/BnaA05g36920D/BnaAnng40010D/BnaC01g35360D/BnaC05g36840D/BnaC05g36860D/BnaC07g11830D/BnaC07g11880D	10
biological_process	GO:0010288	response to lead ion	5/3317	15/76374	0.000320799	0.00102712	0.000498625	BnaA03g09840D/BnaA10g12020D/BnaC01g09840D/BnaC03g12470D/BnaC09g33710D	5
biological_process	GO:0040014	regulation of multicellular organism growth	5/3317	15/76374	0.000320799	0.00102712	0.000498625	BnaA03g09840D/BnaA10g12020D/BnaC01g09840D/BnaC03g12470D/BnaC09g33710D	5
cellular_component	GO:0045298	tubulin complex	9/3317	52/76374	0.000367876	0.001171	0.000568474	BnaA02g04460D/BnaA02g04470D/BnaA03g07740D/BnaA10g15400D/BnaA10g15410D/BnaC02g09000D/BnaC02g09010D/BnaC03g09740D/BnaC09g37930D	9
biological_process	GO:0090333	regulation of stomatal closure	9/3317	52/76374	0.000367876	0.001171	0.000568474	BnaA03g03090D/BnaA03g03100D/BnaA08g16660D/BnaA10g21570D/BnaAnng24980D/BnaC02g00180D/BnaC03g04510D/BnaC03g60430D/BnaC09g45760D	9
biological_process	GO:0000160	phosphorelay signal transduction system	17/3317	153/76374	0.000377796	0.00119909	0.000582111	BnaA02g07870D/BnaA03g34390D/BnaA04g14760D/BnaA05g22950D/BnaA06g34500D/BnaA07g38280D/BnaC02g10950D/BnaC02g10960D/BnaC03g39830D/BnaC04g56320D/BnaC05g36390D/BnaC06g09070D/BnaC06g43070D/BnaC07g21210D/BnaC07g21250D/BnaC07g21260D/BnaC08g10460D	17
biological_process	GO:0000303	response to superoxide	17/3317	154/76374	0.000407733	0.00129037	0.000626423	BnaA01g21880D/BnaA04g26870D/BnaA06g06010D/BnaA08g06940D/BnaA09g40600D/BnaAnng26550D/BnaC01g04330D/BnaC01g28210D/BnaC04g00490D/BnaC04g51510D/BnaC05g07560D/BnaC05g24350D/BnaC05g28860D/BnaC08g33050D/BnaCnng35930D/BnaCnng35940D/BnaCnng53220D	17
biological_process	GO:0048438	floral whorl development	10/3317	64/76374	0.000416951	0.00131574	0.00063874	BnaA01g07810D/BnaA03g23610D/BnaA04g19890D/BnaA05g09790D/BnaA08g13510D/BnaC01g09350D/BnaC03g28030D/BnaC08g13430D/BnaCnng05140D/BnaCnng59830D	10
biological_process	GO:0010105	negative regulation of ethylene-activated signaling pathway	9/3317	53/76374	0.000426185	0.00134101	0.000651009	BnaA03g03090D/BnaA03g03100D/BnaA08g16660D/BnaA10g21570D/BnaAnng24980D/BnaC02g00180D/BnaC03g04510D/BnaC03g60430D/BnaC09g45760D	9
biological_process	GO:0009691	cytokinin biosynthetic process	16/3317	141/76374	0.000437844	0.00137375	0.000666902	BnaA01g00160D/BnaA01g24250D/BnaA04g17860D/BnaA04g17870D/BnaA04g17900D/BnaA05g16720D/BnaA08g15900D/BnaA09g13310D/BnaC01g01080D/BnaC01g31210D/BnaC03g61140D/BnaC04g13730D/BnaC04g41500D/BnaC05g29370D/BnaC09g13580D/BnaCnng64580D	16
cellular_component	GO:0000781	chromosome, telomeric region	5/3317	16/76374	0.000449938	0.00139966	0.000679481	BnaA05g25850D/BnaAnng01780D/BnaC02g01920D/BnaC05g39930D/BnaC08g45230D	5
biological_process	GO:0016125	sterol metabolic process	5/3317	16/76374	0.000449938	0.00139966	0.000679481	BnaA01g32510D/BnaA03g29780D/BnaA05g30520D/BnaC03g35020D/BnaC05g44970D	5
cellular_component	GO:0031982	vesicle	5/3317	16/76374	0.000449938	0.00139966	0.000679481	BnaA10g26300D/BnaAnng00810D/BnaC02g02900D/BnaC03g01440D/BnaCnng10680D	5
biological_process	GO:0048645	animal organ formation	6/3317	24/76374	0.000457111	0.00141795	0.000688359	BnaA03g54930D/BnaA10g27410D/BnaAnng29380D/BnaC02g03640D/BnaC03g00520D/BnaCnng03740D	6
biological_process	GO:0009553	embryo sac development	21/3317	214/76374	0.00046286	0.00143173	0.000695047	BnaA02g03860D/BnaA02g16200D/BnaA03g21800D/BnaA05g00500D/BnaA05g30940D/BnaA07g22900D/BnaA10g11940D/BnaA10g16340D/BnaAnng03220D/BnaAnng08460D/BnaC02g07720D/BnaC02g08260D/BnaC02g21680D/BnaC03g26070D/BnaC04g27450D/BnaC04g51940D/BnaC05g45420D/BnaC06g23880D/BnaC09g39190D/BnaC09g39750D/BnaUnng04810D	21
biological_process	GO:0010182	sugar mediated signaling pathway	38/3317	493/76374	0.00053989	0.0016653	0.000808435	BnaA02g18130D/BnaA02g26510D/BnaA03g18330D/BnaA03g51290D/BnaA05g08020D/BnaA05g10850D/BnaA05g11140D/BnaA06g12580D/BnaA06g18830D/BnaA06g33150D/BnaA06g34100D/BnaA07g21350D/BnaA07g27740D/BnaA07g32820D/BnaA08g12690D/BnaA08g22640D/BnaA09g19690D/BnaA09g26050D/BnaAnng07530D/BnaC01g07310D/BnaC01g14560D/BnaC02g24120D/BnaC02g34690D/BnaC03g21850D/BnaC03g54740D/BnaC03g77370D/BnaC04g09030D/BnaC04g12390D/BnaC04g…	38
biological_process	GO:0009739	response to gibberellin	31/3317	376/76374	0.000560457	0.00172388	0.000836874	BnaA01g04940D/BnaA01g04960D/BnaA01g30920D/BnaA01g31080D/BnaA03g16870D/BnaA03g51810D/BnaA05g07510D/BnaA05g13730D/BnaA05g27740D/BnaA06g17280D/BnaA06g24750D/BnaA06g24760D/BnaA08g00420D/BnaA09g55820D/BnaAnng05010D/BnaAnng26380D/BnaC01g06510D/BnaC01g06530D/BnaC02g43910D/BnaC03g20340D/BnaC03g57070D/BnaC03g70590D/BnaC04g08340D/BnaC05g39930D/BnaC05g41910D/BnaC06g10970D/BnaC06g41680D/BnaC08g33530D/BnaC09g…	31
molecular_function	GO:0004427	inorganic diphosphatase activity	9/3317	55/76374	0.000565667	0.00173018	0.000839935	BnaA06g10340D/BnaA07g35600D/BnaA08g23780D/BnaA09g56670D/BnaC05g11930D/BnaC06g39260D/BnaC06g40530D/BnaC08g16730D/BnaC08g38730D	9
cellular_component	GO:0005654	nucleoplasm	9/3317	55/76374	0.000565667	0.00173018	0.000839935	BnaA02g00930D/BnaA05g08700D/BnaAnng37780D/BnaAnng15660D/BnaC03g19350D/BnaC04g09840D/BnaC09g45330D/BnaCnng77890D/BnaCnng19720D	9
molecular_function	GO:0016706	2-oxoglutarate-dependent dioxygenase activity	27/3317	312/76374	0.000593767	0.00181107	0.000879204	BnaA02g11310D/BnaA02g32460D/BnaA02g32480D/BnaA04g17860D/BnaA04g17870D/BnaA04g17900D/BnaA06g08950D/BnaA06g08960D/BnaA06g08970D/BnaA06g27000D/BnaA08g07840D/BnaA08g24080D/BnaA09g45790D/BnaA09g45800D/BnaC02g15850D/BnaC02g41200D/BnaC04g13730D/BnaC04g41500D/BnaC05g10390D/BnaC05g10400D/BnaC07g29940D/BnaC08g09030D/BnaC08g16020D/BnaC08g39870D/BnaC08g39880D/BnaC09g53200D/BnaCnng64150D	27
molecular_function	GO:0004930	G protein-coupled receptor activity	4/3317	10/76374	0.000603921	0.00183693	0.000891755	BnaA06g33150D/BnaA09g19690D/BnaC07g23240D/BnaC09g21710D	4
biological_process	GO:0030259	lipid glycosylation	5/3317	17/76374	0.000614654	0.0018644	0.00090509	BnaA01g32510D/BnaA03g29780D/BnaA05g30520D/BnaC03g35020D/BnaC05g44970D	5
biological_process	GO:0009790	embryo development	25/3317	281/76374	0.000622306	0.00188239	0.000913826	BnaA01g18270D/BnaA04g03960D/BnaA04g03970D/BnaA04g11900D/BnaA08g06940D/BnaA09g34520D/BnaA09g43450D/BnaA10g08930D/BnaA10g28850D/BnaAnng06520D/BnaAnng29120D/BnaAnng32790D/BnaC01g22200D/BnaC03g57650D/BnaC04g33800D/BnaC05g24350D/BnaC05g28860D/BnaC07g11440D/BnaC08g10490D/BnaC08g25470D/BnaCnng30150D/BnaCnng35930D/BnaCnng35940D/BnaCnng53220D/BnaCnng63720D	25
molecular_function	GO:0004311	farnesyltranstransferase activity	7/3317	35/76374	0.000666339	0.00201003	0.000975791	BnaA04g10140D/BnaA04g11810D/BnaA07g01820D/BnaA09g09680D/BnaC04g32260D/BnaC04g33950D/BnaC09g51100D	7
biological_process	GO:0006809	nitric oxide biosynthetic process	6/3317	26/76374	0.000725741	0.00218321	0.00105986	BnaA08g06940D/BnaC05g24350D/BnaC05g28860D/BnaCnng35930D/BnaCnng35940D/BnaCnng53220D	6
biological_process	GO:0006564	L-serine biosynthetic process	6/3317	27/76374	0.000899009	0.00268966	0.00130572	BnaA02g24710D/BnaA10g26070D/BnaAnng00920D/BnaC02g02760D/BnaC02g32750D/BnaCnng10350D	6
biological_process	GO:0009094	L-phenylalanine biosynthetic process	6/3317	27/76374	0.000899009	0.00268966	0.00130572	BnaA06g07360D/BnaA08g25130D/BnaA09g40600D/BnaC05g08770D/BnaC08g15080D/BnaC08g33050D	6
cellular_component	GO:0031463	Cul3-RING ubiquitin ligase complex	4/3317	11/76374	0.000916383	0.00272674	0.00132372	BnaA06g37360D/BnaA08g16920D/BnaC03g60160D/BnaC07g47630D	4
biological_process	GO:0055065	metal ion homeostasis	4/3317	11/76374	0.000916383	0.00272674	0.00132372	BnaA08g23940D/BnaA09g57040D/BnaC08g16190D/BnaC08g39560D	4
biological_process	GO:0042343	indole glucosinolate metabolic process	7/3317	37/76374	0.000945709	0.00279879	0.0013587	BnaA01g00540D/BnaA08g15660D/BnaC01g01530D/BnaC03g61420D/BnaCnng68210D/BnaCnng74790D/BnaCnng74800D	7
biological_process	GO:0071366	cellular response to indolebutyric acid stimulus	7/3317	37/76374	0.000945709	0.00279879	0.0013587	BnaA03g40730D/BnaA06g09880D/BnaA08g31540D/BnaC05g11500D/BnaC07g31660D/BnaC08g16540D/BnaCnng60340D	7
biological_process	GO:0009887	animal organ morphogenesis	29/3317	355/76374	0.000954494	0.00281717	0.00136763	BnaA01g01350D/BnaA01g04480D/BnaA02g03130D/BnaA03g06110D/BnaA03g23610D/BnaA03g52120D/BnaA03g59180D/BnaA04g07950D/BnaA04g19890D/BnaA05g09790D/BnaA07g25390D/BnaA08g12150D/BnaA08g17390D/BnaA09g26170D/BnaA10g17920D/BnaC01g02360D/BnaC01g05930D/BnaC02g06680D/BnaC03g07850D/BnaC03g28030D/BnaC03g59640D/BnaC03g67130D/BnaC06g27170D/BnaC09g32160D/BnaCnng25410D/BnaCnng05140D/BnaCnng54120D/BnaCnng59830D/BnaCnng…	29
molecular_function	GO:0016161	beta-amylase activity	8/3317	48/76374	0.00100123	0.00294716	0.00143073	BnaA01g35050D/BnaA03g44500D/BnaA08g30450D/BnaA08g30460D/BnaC03g63780D/BnaC03g63790D/BnaC07g36330D/BnaCnng39750D	8
molecular_function	GO:0030570	pectate lyase activity	12/3317	97/76374	0.00102575	0.00301126	0.00146185	BnaA02g02490D/BnaA03g05190D/BnaA03g27540D/BnaA04g07000D/BnaA08g05020D/BnaA10g18990D/BnaC03g06740D/BnaC03g32550D/BnaCnng42620D/BnaCnng05770D/BnaCnng51570D/BnaCnng14640D	12
molecular_function	GO:0000976	transcription regulatory region sequence-specific DNA binding	10/3317	72/76374	0.00107833	0.00315713	0.00153266	BnaA02g14550D/BnaA03g43080D/BnaA07g24100D/BnaA07g28310D/BnaAnng23540D/BnaC06g25160D/BnaC06g30800D/BnaC07g34350D/BnaCnng68370D/BnaCnng70120D	10
biological_process	GO:0048316	seed development	19/3317	198/76374	0.00109841	0.00320735	0.00155704	BnaA01g32510D/BnaA01g34730D/BnaA03g29780D/BnaA03g53830D/BnaA04g11900D/BnaA04g27100D/BnaA05g01200D/BnaA05g30520D/BnaA09g43450D/BnaA09g55530D/BnaC01g01710D/BnaC03g35020D/BnaC04g00760D/BnaC04g50960D/BnaC05g44970D/BnaC07g11440D/BnaC08g31760D/BnaCnng30150D/BnaCnng39690D	19
molecular_function	GO:0009044	xylan 1,4-beta-xylosidase activity	7/3317	38/76374	0.00111619	0.00324198	0.00157385	BnaA04g00410D/BnaA07g19420D/BnaC04g55020D/BnaC06g18580D/BnaCnng75040D/BnaCnng33520D/BnaUnng02930D	7
molecular_function	GO:0016818	hydrolase activity, acting on acid anhydrides, in phosphorus-containing anhydrides	7/3317	38/76374	0.00111619	0.00324198	0.00157385	BnaA04g05130D/BnaA07g15850D/BnaA09g33270D/BnaC03g20100D/BnaC06g14240D/BnaC08g24080D/BnaCnng50230D	7
molecular_function	GO:0002020	protease binding	8/3317	49/76374	0.00115153	0.00333578	0.00161939	BnaA03g30810D/BnaA05g29140D/BnaA05g29150D/BnaA08g06920D/BnaC03g36110D/BnaC05g43610D/BnaC05g43620D/BnaCnng39140D	8
biological_process	GO:0009743	response to carbohydrate	13/3317	112/76374	0.00117768	0.00340253	0.00165179	BnaA01g21880D/BnaA04g26870D/BnaA06g06010D/BnaA08g06940D/BnaC01g28210D/BnaC04g00490D/BnaC04g51510D/BnaC05g07560D/BnaC05g24350D/BnaC05g28860D/BnaCnng35930D/BnaCnng35940D/BnaCnng53220D	13
molecular_function	GO:0005034	osmosensor activity	4/3317	12/76374	0.00132738	0.00378226	0.00183614	BnaA06g34500D/BnaC07g21210D/BnaC07g21250D/BnaC07g21260D	4
biological_process	GO:0009584	detection of visible light	4/3317	12/76374	0.00132738	0.00378226	0.00183614	BnaA03g34390D/BnaA05g22950D/BnaC03g39830D/BnaC05g36390D	4
biological_process	GO:0017006	protein-tetrapyrrole linkage	4/3317	12/76374	0.00132738	0.00378226	0.00183614	BnaA03g34390D/BnaA05g22950D/BnaC03g39830D/BnaC05g36390D	4
biological_process	GO:0048283	indeterminate inflorescence morphogenesis	4/3317	12/76374	0.00132738	0.00378226	0.00183614	BnaA03g01690D/BnaA10g24820D/BnaC03g02240D/BnaC09g49740D	4
biological_process	GO:0048437	floral organ development	4/3317	12/76374	0.00132738	0.00378226	0.00183614	BnaA06g08740D/BnaA09g57150D/BnaC05g10050D/BnaC08g40210D	4
biological_process	GO:0042127	regulation of cell population proliferation	18/3317	186/76374	0.00132984	0.00378226	0.00183614	BnaA01g00290D/BnaA06g21560D/BnaA06g33150D/BnaA08g15790D/BnaA09g19690D/BnaA09g19860D/BnaA09g40600D/BnaA10g01360D/BnaC01g01290D/BnaC03g61270D/BnaC05g01400D/BnaC07g23240D/BnaC07g46770D/BnaC07g48230D/BnaC08g33050D/BnaC09g21710D/BnaC09g21860D/BnaCnng72090D	18
biological_process	GO:0006807	nitrogen compound metabolic process	6/3317	29/76374	0.00133934	0.00378675	0.00183832	BnaA03g03750D/BnaA10g20600D/BnaC02g04190D/BnaC02g04200D/BnaC03g05250D/BnaC09g44620D	6
biological_process	GO:0009590	detection of gravity	6/3317	29/76374	0.00133934	0.00378675	0.00183832	BnaA02g18710D/BnaA07g33900D/BnaAnng14300D/BnaC02g24750D/BnaC06g38530D/BnaC07g14000D	6
biological_process	GO:0051258	protein polymerization	12/3317	100/76374	0.00134179	0.00378675	0.00183832	BnaA02g04460D/BnaA02g04470D/BnaA03g07730D/BnaA03g07740D/BnaA10g15400D/BnaA10g15410D/BnaC02g09000D/BnaC02g09010D/BnaC03g09730D/BnaC03g09740D/BnaC09g37880D/BnaC09g37930D	12
biological_process	GO:0007276	gamete generation	9/3317	62/76374	0.0013751	0.00386085	0.00187429	BnaA01g00290D/BnaA07g34360D/BnaA08g15790D/BnaC01g01290D/BnaC03g61270D/BnaC03g70510D/BnaC06g39190D/BnaC07g46770D/BnaCnng72090D	9
molecular_function	GO:0015078	proton transmembrane transporter activity	9/3317	62/76374	0.0013751	0.00386085	0.00187429	BnaA04g12160D/BnaA09g43200D/BnaC02g14820D/BnaC04g33510D/BnaC04g35070D/BnaC07g29900D/BnaC08g35720D/BnaCnng75420D/BnaCnng37770D	9
biological_process	GO:0010152	pollen maturation	8/3317	51/76374	0.00150588	0.00421723	0.0020473	BnaA04g00230D/BnaA05g04340D/BnaA07g19520D/BnaA09g40340D/BnaC04g05220D/BnaC06g43000D/BnaC08g32660D/BnaCnng60850D	8
molecular_function	GO:0008289	lipid binding	24/3317	284/76374	0.00159313	0.00444613	0.00215842	BnaA01g18740D/BnaA04g01950D/BnaA04g29620D/BnaA05g35360D/BnaA06g12430D/BnaA07g17900D/BnaA08g05650D/BnaA08g22710D/BnaA09g13230D/BnaA09g44630D/BnaA09g44650D/BnaA09g52860D/BnaC01g22500D/BnaC04g23540D/BnaC04g50990D/BnaC05g14030D/BnaC06g11390D/BnaC06g16630D/BnaC08g10150D/BnaC08g17860D/BnaC08g37340D/BnaC08g37370D/BnaC09g09750D/BnaCnng68070D	24
biological_process	GO:0010584	pollen exine formation	20/3317	220/76374	0.00159574	0.00444613	0.00215842	BnaA01g05490D/BnaA04g06280D/BnaA05g13090D/BnaA06g05060D/BnaA06g40640D/BnaA08g07600D/BnaA08g16520D/BnaA08g26800D/BnaA09g15850D/BnaC01g40650D/BnaC01g40660D/BnaC03g60590D/BnaC04g29090D/BnaC05g06330D/BnaC06g11750D/BnaC07g47240D/BnaC08g07170D/BnaC08g08340D/BnaC09g16350D/BnaCnng47820D	20
biological_process	GO:0044070	regulation of anion transport	6/3317	30/76374	0.00161319	0.00448336	0.00217649	BnaA02g02470D/BnaA10g29750D/BnaCnng69120D/BnaCnng35390D/BnaCnng35410D/BnaCnng42590D	6
cellular_component	GO:0005856	cytoskeleton	11/3317	89/76374	0.00164827	0.00456927	0.0022182	BnaA01g19850D/BnaA02g07080D/BnaA03g09510D/BnaA06g18020D/BnaA06g20460D/BnaA10g12390D/BnaC02g10000D/BnaC03g12030D/BnaC03g55960D/BnaC03g75050D/BnaC09g34680D	11
biological_process	GO:0009266	response to temperature stimulus	32/3317	420/76374	0.00169245	0.00467989	0.0022719	BnaA01g05320D/BnaA01g31350D/BnaA02g33370D/BnaA04g12170D/BnaA04g12990D/BnaA05g28000D/BnaA05g28020D/BnaA06g17500D/BnaA06g21790D/BnaA06g34810D/BnaA06g36920D/BnaA08g16740D/BnaA09g18700D/BnaA09g35800D/BnaA09g42480D/BnaC01g00170D/BnaC02g30040D/BnaC03g51740D/BnaC03g71020D/BnaC04g17250D/BnaC04g17750D/BnaC04g33500D/BnaC04g35060D/BnaC04g47950D/BnaC05g42240D/BnaC07g09190D/BnaC07g20900D/BnaC08g27300D/BnaC08g…	32
biological_process	GO:0031347	regulation of defense response	23/3317	270/76374	0.00177479	0.0048841	0.00237104	BnaA01g27620D/BnaA02g11190D/BnaA03g20690D/BnaA03g23420D/BnaA03g27750D/BnaA03g34390D/BnaA05g22950D/BnaA06g16860D/BnaA06g17280D/BnaAnng14940D/BnaAnng14950D/BnaAnng16870D/BnaC01g35160D/BnaC01g35170D/BnaC02g15480D/BnaC03g24720D/BnaC03g32790D/BnaC03g39830D/BnaC03g57070D/BnaC05g36390D/BnaC05g48480D/BnaCnng69880D/BnaCnng12060D	23
molecular_function	GO:0015086	cadmium ion transmembrane transporter activity	7/3317	41/76374	0.00177523	0.0048841	0.00237104	BnaA03g40730D/BnaA06g09880D/BnaA08g31540D/BnaC05g11500D/BnaC07g31660D/BnaC08g16540D/BnaCnng60340D	7
molecular_function	GO:0004610	phosphoacetylglucosamine mutase activity	4/3317	13/76374	0.0018516	0.00505611	0.00245454	BnaA03g06870D/BnaA10g16760D/BnaC03g08770D/BnaC09g39780D	4
biological_process	GO:0006048	UDP-N-acetylglucosamine biosynthetic process	4/3317	13/76374	0.0018516	0.00505611	0.00245454	BnaA03g06870D/BnaA10g16760D/BnaC03g08770D/BnaC09g39780D	4
cellular_component	GO:0010445	nuclear dicing body	4/3317	13/76374	0.0018516	0.00505611	0.00245454	BnaA06g05600D/BnaA08g26200D/BnaC05g07140D/BnaC08g13800D	4
biological_process	GO:0052543	callose deposition in cell wall	14/3317	132/76374	0.00186481	0.00507953	0.00246591	BnaA01g00160D/BnaA02g35830D/BnaA04g12990D/BnaA07g24360D/BnaA07g27710D/BnaA08g15900D/BnaA09g42480D/BnaC01g01080D/BnaC03g61140D/BnaC04g35060D/BnaC06g25500D/BnaC06g29980D/BnaC08g34920D/BnaCnng64580D	14
biological_process	GO:0032875	regulation of DNA endoreduplication	8/3317	53/76374	0.00194152	0.00527533	0.00256096	BnaA06g16860D/BnaA07g34360D/BnaAnng14940D/BnaAnng14950D/BnaC03g70510D/BnaC06g39190D/BnaCnng69880D/BnaCnng12060D	8
cellular_component	GO:0005839	proteasome core complex	10/3317	78/76374	0.00200127	0.00542423	0.00263325	BnaA01g03390D/BnaA01g18740D/BnaA05g35360D/BnaA08g05650D/BnaA08g11580D/BnaC01g04670D/BnaC01g22500D/BnaC03g66560D/BnaC06g11390D/BnaC08g10150D	10
biological_process	GO:0007043	cell-cell junction assembly	5/3317	22/76374	0.00218241	0.00588605	0.00285745	BnaA03g05360D/BnaA10g18830D/BnaC03g06890D/BnaC06g13260D/BnaCnng62670D	5
cellular_component	GO:0048226	Casparian strip	5/3317	22/76374	0.00218241	0.00588605	0.00285745	BnaA03g05360D/BnaA10g18830D/BnaC03g06890D/BnaC06g13260D/BnaCnng62670D	5
molecular_function	GO:0004739	pyruvate dehydrogenase (acetyl-transferring) activity	6/3317	32/76374	0.00228612	0.00613555	0.00297857	BnaA02g11520D/BnaA03g13490D/BnaA10g05930D/BnaC02g16000D/BnaC03g16370D/BnaC09g26770D	6
biological_process	GO:0010497	plasmodesmata-mediated intercellular transport	6/3317	32/76374	0.00228612	0.00613555	0.00297857	BnaA03g09840D/BnaA07g04200D/BnaA10g12020D/BnaC01g25910D/BnaC03g12470D/BnaC09g33710D	6
cellular_component	GO:0090406	pollen tube	16/3317	165/76374	0.0023432	0.00627336	0.00304547	BnaA03g21590D/BnaA05g00810D/BnaA07g19220D/BnaA08g13200D/BnaA08g13220D/BnaA09g39720D/BnaC01g08240D/BnaC03g68070D/BnaC03g72420D/BnaC04g00460D/BnaC04g21470D/BnaC06g18400D/BnaCnng76410D/BnaCnng40130D/BnaCnng47990D/BnaCnng66900D	16
biological_process	GO:0019915	lipid storage	32/3317	429/76374	0.00235487	0.00628922	0.00305317	BnaA02g18130D/BnaA02g26510D/BnaA03g18330D/BnaA03g51290D/BnaA05g08020D/BnaA05g10850D/BnaA06g12580D/BnaA06g18830D/BnaA06g34100D/BnaA07g21350D/BnaA07g27740D/BnaA07g32820D/BnaA08g12690D/BnaA08g22640D/BnaA09g26050D/BnaAnng07530D/BnaC01g07310D/BnaC01g14560D/BnaC02g24120D/BnaC02g34690D/BnaC03g21850D/BnaC03g54740D/BnaC03g77370D/BnaC04g09030D/BnaC04g12390D/BnaC05g14140D/BnaC05g23470D/BnaC06g21820D/BnaC06g…	32
biological_process	GO:0031537	regulation of anthocyanin metabolic process	8/3317	55/76374	0.00247072	0.00658259	0.00319558	BnaA04g14760D/BnaA06g34500D/BnaC04g56320D/BnaC06g09070D/BnaC07g21210D/BnaC07g21250D/BnaC07g21260D/BnaC08g10460D	8
biological_process	GO:0009423	chorismate biosynthetic process	4/3317	14/76374	0.00250352	0.00665376	0.00323014	BnaA05g36390D/BnaA08g02980D/BnaC05g25830D/BnaC08g03290D	4
molecular_function	GO:0008308	voltage-gated anion channel activity	6/3317	33/76374	0.00269266	0.00713913	0.00346576	BnaA02g02470D/BnaA10g29750D/BnaCnng69120D/BnaCnng35390D/BnaCnng35410D/BnaCnng42590D	6
biological_process	GO:0009960	endosperm development	12/3317	109/76374	0.00280277	0.00740708	0.00359584	BnaA01g25940D/BnaA03g16140D/BnaA05g08730D/BnaAnng23800D/BnaAnng23810D/BnaAnng25430D/BnaC01g33140D/BnaC03g19320D/BnaC03g69160D/BnaC03g69190D/BnaC03g77690D/BnaC04g09870D	12
biological_process	GO:0016226	iron-sulfur cluster assembly	30/3317	399/76374	0.00280725	0.00740708	0.00359584	BnaA01g03890D/BnaA01g03950D/BnaA01g29050D/BnaA03g21110D/BnaA03g33680D/BnaA03g39870D/BnaA03g52290D/BnaA03g59020D/BnaA05g11640D/BnaA05g11650D/BnaA05g24520D/BnaA07g38010D/BnaA08g27360D/BnaA08g29730D/BnaAnng40070D/BnaAnng27820D/BnaC01g05260D/BnaC01g05470D/BnaC01g36430D/BnaC02g41900D/BnaC03g25170D/BnaC03g38850D/BnaC04g13290D/BnaC04g50150D/BnaC06g16230D/BnaC07g41520D/BnaC07g49840D/BnaC08g00140D/BnaC08g…	30
biological_process	GO:0009880	embryonic pattern specification	17/3317	185/76374	0.00307134	0.00807698	0.00392105	BnaA06g07730D/BnaA07g36710D/BnaA08g19170D/BnaA09g26050D/BnaA09g44950D/BnaA09g46720D/BnaA10g02680D/BnaAnng12210D/BnaC05g02660D/BnaC05g09160D/BnaC05g23470D/BnaC07g11010D/BnaC08g37670D/BnaC08g37680D/BnaC08g40750D/BnaC08g50150D/BnaCnng04890D	17
biological_process	GO:0033044	regulation of chromosome organization	23/3317	282/76374	0.00307589	0.00807698	0.00392105	BnaA01g27720D/BnaA03g42230D/BnaA05g23190D/BnaA06g12580D/BnaA06g27100D/BnaA08g22640D/BnaA09g04800D/BnaA09g26050D/BnaA10g16340D/BnaAnng08460D/BnaAnng33030D/BnaC01g35240D/BnaC02g08260D/BnaC03g39700D/BnaC05g14140D/BnaC05g23470D/BnaC05g36590D/BnaC06g07540D/BnaC06g07570D/BnaC07g29850D/BnaC08g17980D/BnaC09g39190D/BnaCnng69150D	23
cellular_component	GO:0005743	mitochondrial inner membrane	25/3317	316/76374	0.0031322	0.00820516	0.00398328	BnaA01g08290D/BnaA02g09690D/BnaA03g02610D/BnaA03g09840D/BnaA03g35510D/BnaA05g15910D/BnaA05g19230D/BnaA06g02860D/BnaA07g14810D/BnaA10g07360D/BnaA10g12020D/BnaAnng06020D/BnaC01g09840D/BnaC02g01060D/BnaC02g44600D/BnaC03g12470D/BnaC03g41300D/BnaC05g32690D/BnaC05g32750D/BnaC06g03520D/BnaC06g42230D/BnaC09g30710D/BnaC09g33710D/BnaCnng25790D/BnaCnng73730D	25
biological_process	GO:0006974	cellular response to DNA damage stimulus	6/3317	34/76374	0.00315101	0.00823474	0.00399764	BnaA02g09460D/BnaA02g27980D/BnaA03g11710D/BnaA10g08550D/BnaC03g71780D/BnaC09g31160D	6
molecular_function	GO:0043621	protein self-association	12/3317	111/76374	0.0032593	0.00845543	0.00410477	BnaA03g43080D/BnaA05g20980D/BnaA06g39070D/BnaA07g32120D/BnaAnng23540D/BnaC05g33720D/BnaC06g36500D/BnaC07g34350D/BnaCnng68370D/BnaCnng24550D/BnaCnng78420D/BnaCnng78500D	12
biological_process	GO:0080086	stamen filament development	5/3317	24/76374	0.00327733	0.00845543	0.00410477	BnaA01g28670D/BnaA03g33930D/BnaC01g36030D/BnaC03g39170D/BnaCnng74250D	5
biological_process	GO:0032957	inositol trisphosphate metabolic process	11/3317	97/76374	0.00327807	0.00845543	0.00410477	BnaA01g03220D/BnaA03g06170D/BnaA03g38640D/BnaA03g50630D/BnaA10g17710D/BnaAnng34680D/BnaC01g04480D/BnaC03g07940D/BnaC03g66400D/BnaC09g41080D/BnaCnng47190D	11
biological_process	GO:0007231	osmosensory signaling pathway	4/3317	15/76374	0.00329723	0.00845543	0.00410477	BnaA06g34500D/BnaC07g21210D/BnaC07g21250D/BnaC07g21260D	4
molecular_function	GO:0009882	blue light photoreceptor activity	4/3317	15/76374	0.00329723	0.00845543	0.00410477	BnaA08g27870D/BnaA10g02550D/BnaC05g02520D/BnaC08g00670D	4
biological_process	GO:0033500	carbohydrate homeostasis	4/3317	15/76374	0.00329723	0.00845543	0.00410477	BnaA06g34500D/BnaC07g21210D/BnaC07g21250D/BnaC07g21260D	4
biological_process	GO:0033587	shikimate biosynthetic process	4/3317	15/76374	0.00329723	0.00845543	0.00410477	BnaA05g36390D/BnaA08g02980D/BnaC05g25830D/BnaC08g03290D	4
molecular_function	GO:0050307	sucrose-phosphate phosphatase activity	4/3317	15/76374	0.00329723	0.00845543	0.00410477	BnaA05g15220D/BnaC03g68760D/BnaC05g24120D/BnaC06g08810D	4
biological_process	GO:0006567	threonine catabolic process	7/3317	46/76374	0.00350072	0.0089354	0.00433778	BnaA03g01690D/BnaA03g21950D/BnaA10g24820D/BnaC03g02240D/BnaC03g26270D/BnaC04g23920D/BnaC09g49740D	7
biological_process	GO:0042344	indole glucosinolate catabolic process	7/3317	46/76374	0.00350072	0.0089354	0.00433778	BnaA03g40730D/BnaA06g09880D/BnaA08g31540D/BnaC05g11500D/BnaC07g31660D/BnaC08g16540D/BnaCnng60340D	7
biological_process	GO:0007059	chromosome segregation	9/3317	71/76374	0.00356454	0.00907714	0.00440659	BnaA01g07750D/BnaA03g55060D/BnaA03g55070D/BnaA05g28510D/BnaA10g26080D/BnaAnng17740D/BnaC03g01570D/BnaC05g42830D/BnaCnng10360D	9
biological_process	GO:0000719	photoreactive repair	4/3317	16/76374	0.00424633	0.0107137	0.00520106	BnaA03g06870D/BnaA10g16760D/BnaC03g08770D/BnaC09g39780D	4
molecular_function	GO:0016707	gibberellin 3-beta-dioxygenase activity	4/3317	16/76374	0.00424633	0.0107137	0.00520106	BnaA06g10250D/BnaA09g57140D/BnaC05g11920D/BnaC08g38810D	4
molecular_function	GO:0035198	miRNA binding	4/3317	16/76374	0.00424633	0.0107137	0.00520106	BnaA06g05600D/BnaA08g26200D/BnaC05g07140D/BnaC08g13800D	4
biological_process	GO:0071329	cellular response to sucrose stimulus	4/3317	16/76374	0.00424633	0.0107137	0.00520106	BnaA06g34500D/BnaC07g21210D/BnaC07g21250D/BnaC07g21260D	4
biological_process	GO:0009791	post-embryonic development	9/3317	73/76374	0.00430196	0.0108042	0.00524503	BnaA04g09130D/BnaA04g17430D/BnaA05g12120D/BnaA06g03150D/BnaC03g57650D/BnaC04g14480D/BnaC04g31350D/BnaC04g33800D/BnaC04g41060D	9
biological_process	GO:0010380	regulation of chlorophyll biosynthetic process	9/3317	73/76374	0.00430196	0.0108042	0.00524503	BnaA03g09840D/BnaA04g14760D/BnaA10g12020D/BnaC01g09840D/BnaC03g12470D/BnaC04g56320D/BnaC06g09070D/BnaC08g10460D/BnaC09g33710D	9
biological_process	GO:0010224	response to UV-B	31/3317	431/76374	0.00463618	0.011617	0.00563958	BnaA01g05490D/BnaA02g35530D/BnaA03g04760D/BnaA04g15750D/BnaA06g40640D/BnaA07g17130D/BnaA08g16520D/BnaA09g06920D/BnaA09g36360D/BnaA10g19490D/BnaA10g22400D/BnaA10g23330D/BnaAnng41910D/BnaAnng29480D/BnaC01g40650D/BnaC01g40660D/BnaC03g06300D/BnaC03g60590D/BnaC03g74080D/BnaC04g24650D/BnaC04g39030D/BnaC05g15360D/BnaC07g47240D/BnaC08g27940D/BnaC09g06420D/BnaC09g46960D/BnaC09g47980D/BnaC09g54540D/BnaCnng…	31
molecular_function	GO:0043022	ribosome binding	5/3317	26/76374	0.0047199	0.0117998	0.00572831	BnaA03g02610D/BnaA07g14810D/BnaAnng06020D/BnaC02g01060D/BnaC06g42230D	5
molecular_function	GO:0003712	transcription coregulator activity	10/3317	88/76374	0.00486322	0.0121304	0.00588881	BnaA10g08930D/BnaA10g26300D/BnaA10g28850D/BnaAnng06520D/BnaAnng32790D/BnaAnng00810D/BnaC02g02900D/BnaC03g01440D/BnaCnng10680D/BnaCnng63720D	10
molecular_function	GO:0008762	UDP-N-acetylmuramate dehydrogenase activity	14/3317	147/76374	0.00498531	0.0124066	0.00602292	BnaA01g25880D/BnaA02g08420D/BnaA05g01130D/BnaA05g01140D/BnaA05g19350D/BnaA06g02910D/BnaA10g28940D/BnaC01g33070D/BnaC04g00700D/BnaC05g32840D/BnaC06g03410D/BnaC06g03470D/BnaC09g33450D/BnaCnng41060D	14
cellular_component	GO:0009524	phragmoplast	21/3317	260/76374	0.00505621	0.0125545	0.00609473	BnaA01g08290D/BnaA02g35060D/BnaA03g07190D/BnaA03g35510D/BnaA05g15910D/BnaA05g19230D/BnaA06g02860D/BnaA06g21560D/BnaA09g19860D/BnaA10g16380D/BnaC01g09840D/BnaC02g08200D/BnaC03g09110D/BnaC03g41300D/BnaC05g32690D/BnaC05g32750D/BnaC06g03520D/BnaC09g21860D/BnaC09g39240D/BnaCnng25790D/BnaCnng73730D	21
biological_process	GO:0006651	diacylglycerol biosynthetic process	4/3317	17/76374	0.00536377	0.0131394	0.00637867	BnaA01g02170D/BnaA10g13450D/BnaC01g03300D/BnaC09g53950D	4
biological_process	GO:0009745	sucrose mediated signaling	4/3317	17/76374	0.00536377	0.0131394	0.00637867	BnaA02g35530D/BnaAnng41910D/BnaC03g74080D/BnaCnng28030D	4
biological_process	GO:0010344	seed oilbody biogenesis	4/3317	17/76374	0.00536377	0.0131394	0.00637867	BnaA07g08500D/BnaA09g27380D/BnaC05g50460D/BnaC07g10500D	4
molecular_function	GO:0016652	oxidoreductase activity, acting on NAD(P)H, NAD(P) as acceptor	4/3317	17/76374	0.00536377	0.0131394	0.00637867	BnaA03g27070D/BnaA09g51860D/BnaCnng60330D/BnaCnng02240D	4
biological_process	GO:0033356	UDP-L-arabinose metabolic process	4/3317	17/76374	0.00536377	0.0131394	0.00637867	BnaA03g31000D/BnaA05g37110D/BnaC03g36310D/BnaC05g43660D	4
biological_process	GO:0035279	mRNA cleavage involved in gene silencing by miRNA	4/3317	17/76374	0.00536377	0.0131394	0.00637867	BnaA06g05600D/BnaA08g26200D/BnaC05g07140D/BnaC08g13800D	4
biological_process	GO:0009396	folic acid-containing compound biosynthetic process	5/3317	27/76374	0.00558829	0.0136285	0.00661607	BnaA03g32210D/BnaA05g26750D/BnaC03g37500D/BnaC05g40770D/BnaCnng22920D	5
biological_process	GO:0043433	negative regulation of DNA-binding transcription factor activity	5/3317	27/76374	0.00558829	0.0136285	0.00661607	BnaA03g02470D/BnaAnng06150D/BnaC02g01170D/BnaC03g03480D/BnaC09g47560D	5
biological_process	GO:0045454	cell redox homeostasis	32/3317	459/76374	0.00638839	0.0155451	0.00754651	BnaA02g35040D/BnaA03g01100D/BnaA03g01110D/BnaA03g09840D/BnaA03g21800D/BnaA03g27200D/BnaA05g00500D/BnaA05g33390D/BnaA07g04200D/BnaA07g16540D/BnaA07g33040D/BnaA09g34730D/BnaA09g55010D/BnaA10g12020D/BnaAnng12670D/BnaAnng00840D/BnaC01g25910D/BnaC02g02860D/BnaC02g06570D/BnaC03g01470D/BnaC03g01480D/BnaC03g12470D/BnaC03g26070D/BnaC03g32200D/BnaC04g27450D/BnaC04g51940D/BnaC06g15480D/BnaC06g37580D/BnaC08g…	32
cellular_component	GO:0009579	thylakoid	21/3317	266/76374	0.00651948	0.0158289	0.00768429	BnaA01g14450D/BnaA02g09460D/BnaA02g18970D/BnaA02g27980D/BnaA03g11710D/BnaA03g13310D/BnaA03g47140D/BnaA06g26040D/BnaA07g34280D/BnaA09g05370D/BnaA10g05840D/BnaA10g08550D/BnaC01g17020D/BnaC02g25080D/BnaC02g42190D/BnaC03g16120D/BnaC03g71780D/BnaC07g39340D/BnaC09g04910D/BnaC09g31160D/BnaCnng69530D	21
biological_process	GO:0051301	cell division	26/3317	353/76374	0.00664978	0.016103	0.00781736	BnaA01g35820D/BnaA02g04890D/BnaA03g56130D/BnaA07g27740D/BnaA09g06920D/BnaA09g14430D/BnaA09g14440D/BnaA09g26050D/BnaA09g44950D/BnaA10g15000D/BnaA10g22400D/BnaAnng29480D/BnaC01g28350D/BnaC03g10110D/BnaC04g18720D/BnaC05g23470D/BnaC05g50230D/BnaC08g37670D/BnaC08g37680D/BnaC09g06420D/BnaC09g15030D/BnaC09g37370D/BnaC09g46960D/BnaCnng51610D/BnaCnng61410D/BnaUnng03590D	26
biological_process	GO:0080060	integument development	4/3317	18/76374	0.00666178	0.016103	0.00781736	BnaA05g20080D/BnaA09g26050D/BnaC05g23470D/BnaC05g31440D	4
biological_process	GO:0070417	cellular response to cold	8/3317	66/76374	0.00766756	0.0184933	0.00897778	BnaA03g30810D/BnaA05g29140D/BnaA05g29150D/BnaA08g06920D/BnaC03g36110D/BnaC05g43610D/BnaC05g43620D/BnaCnng39140D	8
molecular_function	GO:0051087	chaperone binding	7/3317	53/76374	0.00775459	0.0186621	0.00905973	BnaA01g15900D/BnaA08g14300D/BnaA08g29730D/BnaC03g10880D/BnaC07g40540D/BnaC08g12310D/BnaC08g47050D	7
biological_process	GO:0031323	regulation of cellular metabolic process	6/3317	41/76374	0.00814164	0.0193209	0.00937951	BnaA01g31270D/BnaA03g23420D/BnaA07g03950D/BnaC03g41540D/BnaC03g73300D/BnaC04g33800D	6
cellular_component	GO:0000123	histone acetyltransferase complex	4/3317	19/76374	0.00815182	0.0193209	0.00937951	BnaA03g43080D/BnaAnng23540D/BnaC07g34350D/BnaCnng68370D	4
molecular_function	GO:0004180	carboxypeptidase activity	4/3317	19/76374	0.00815182	0.0193209	0.00937951	BnaA04g03960D/BnaA04g03970D/BnaA09g34520D/BnaC08g25470D	4
molecular_function	GO:0004781	sulfate adenylyltransferase (ATP) activity	4/3317	19/76374	0.00815182	0.0193209	0.00937951	BnaA03g01690D/BnaA10g24820D/BnaC03g02240D/BnaC09g49740D	4
molecular_function	GO:0010484	H3 histone acetyltransferase activity	4/3317	19/76374	0.00815182	0.0193209	0.00937951	BnaA03g43080D/BnaAnng23540D/BnaC07g34350D/BnaCnng68370D	4
biological_process	GO:0010501	RNA secondary structure unwinding	4/3317	19/76374	0.00815182	0.0193209	0.00937951	BnaA01g01560D/BnaAnng26260D/BnaAnng08360D/BnaCnng42010D	4
molecular_function	GO:0016628	oxidoreductase activity, acting on the CH-CH group of donors, NAD or NADP as acceptor	4/3317	19/76374	0.00815182	0.0193209	0.00937951	BnaA08g02140D/BnaC03g68620D/BnaC05g26480D/BnaC05g26490D	4
biological_process	GO:0000741	karyogamy	15/3317	173/76374	0.00876844	0.0207374	0.0100672	BnaA01g35820D/BnaA03g32190D/BnaA04g27370D/BnaA05g26770D/BnaA09g14430D/BnaA09g14440D/BnaA09g38450D/BnaC01g28350D/BnaC03g37480D/BnaC04g18720D/BnaC04g55100D/BnaC05g40790D/BnaC08g30590D/BnaC09g15030D/BnaC09g52040D	15
biological_process	GO:0042176	regulation of protein catabolic process	5/3317	30/76374	0.00885956	0.0208628	0.0101281	BnaA06g34810D/BnaA09g18700D/BnaC04g17250D/BnaC07g20900D/BnaC09g52270D	5
biological_process	GO:0070574	cadmium ion transmembrane transport	5/3317	30/76374	0.00885956	0.0208628	0.0101281	BnaA06g09880D/BnaA08g31540D/BnaC05g11500D/BnaC08g16540D/BnaCnng60340D	5
biological_process	GO:0019722	calcium-mediated signaling	20/3317	257/76374	0.00905393	0.0212748	0.0103281	BnaA01g26200D/BnaA02g11520D/BnaA02g21200D/BnaA03g13490D/BnaA03g35190D/BnaA04g18890D/BnaA05g31430D/BnaA05g35190D/BnaA10g05930D/BnaAnng16690D/BnaC01g43800D/BnaC02g16000D/BnaC02g26190D/BnaC03g16370D/BnaC04g12240D/BnaC04g43100D/BnaC04g43110D/BnaC05g45960D/BnaC09g26770D/BnaCnng41320D	20
molecular_function	GO:0004021	L-alanine:2-oxoglutarate aminotransferase activity	8/3317	68/76374	0.00914809	0.02145	0.0104131	BnaA02g14990D/BnaA09g31180D/BnaA09g31200D/BnaAnng22030D/BnaAnng22040D/BnaC02g19980D/BnaC05g18610D/BnaC06g43720D	8
biological_process	GO:0000272	polysaccharide catabolic process	13/3317	143/76374	0.00969719	0.0226507	0.010996	BnaA01g25880D/BnaA02g18710D/BnaA05g19350D/BnaA06g02910D/BnaA07g33900D/BnaAnng14300D/BnaC01g33070D/BnaC02g24750D/BnaC05g32840D/BnaC06g03410D/BnaC06g03450D/BnaC06g38530D/BnaC07g14000D	13
biological_process	GO:0050665	hydrogen peroxide biosynthetic process	27/3317	382/76374	0.00970152	0.0226507	0.010996	BnaA01g01750D/BnaA01g09100D/BnaA01g27720D/BnaA03g42230D/BnaA03g58240D/BnaA05g15220D/BnaA05g23190D/BnaA05g25850D/BnaAnng38860D/BnaAnng33030D/BnaAnng01780D/BnaC01g02870D/BnaC01g10780D/BnaC01g35240D/BnaC02g01920D/BnaC03g39700D/BnaC03g68760D/BnaC05g24120D/BnaC05g36590D/BnaC05g39930D/BnaC06g07540D/BnaC06g07570D/BnaC06g08810D/BnaC07g35250D/BnaC08g11060D/BnaC08g45230D/BnaCnng69150D	27
biological_process	GO:0006665	sphingolipid metabolic process	4/3317	20/76374	0.00984446	0.0228383	0.0110871	BnaA05g15220D/BnaC03g68760D/BnaC05g24120D/BnaC06g08810D	4
biological_process	GO:0009687	abscisic acid metabolic process	4/3317	20/76374	0.00984446	0.0228383	0.0110871	BnaA03g34390D/BnaA05g22950D/BnaC03g39830D/BnaC05g36390D	4
molecular_function	GO:0016174	NAD(P)H oxidase (H(2)O(2)-forming activity	4/3317	20/76374	0.00984446	0.0228383	0.0110871	BnaA09g48550D/BnaC08g42780D/BnaC08g42790D/BnaCnng48040D	4
cellular_component	GO:0090404	pollen tube tip	8/3317	69/76374	0.00996356	0.0230657	0.0111975	BnaA02g31020D/BnaA03g06060D/BnaA06g29230D/BnaA10g17960D/BnaC02g39350D/BnaC03g07810D/BnaC07g27490D/BnaC09g41430D	8
biological_process	GO:0080001	mucilage extrusion from seed coat	5/3317	31/76374	0.0101926	0.0235463	0.0114308	BnaA01g04480D/BnaA03g52120D/BnaA08g12150D/BnaC01g05930D/BnaC03g67130D	5
biological_process	GO:0019432	triglyceride biosynthetic process	6/3317	43/76374	0.0102589	0.0236495	0.0114809	BnaA01g02170D/BnaA07g16350D/BnaA10g13450D/BnaC01g03300D/BnaC08g25150D/BnaC09g53950D	6
molecular_function	GO:0008519	ammonium transmembrane transporter activity	3/3317	11/76374	0.0103868	0.0238939	0.0115996	BnaA01g23190D/BnaA07g05760D/BnaUnng02430D	3
biological_process	GO:0010345	suberin biosynthetic process	7/3317	56/76374	0.0104313	0.0238959	0.0116005	BnaA02g07380D/BnaAnng38120D/BnaAnng17300D/BnaC02g10430D/BnaC02g10440D/BnaC03g12340D/BnaCnng69760D	7
biological_process	GO:0010951	negative regulation of endopeptidase activity	7/3317	56/76374	0.0104313	0.0238959	0.0116005	BnaA07g22750D/BnaA07g30710D/BnaC06g23690D/BnaC06g23700D/BnaC06g34170D/BnaC06g34210D/BnaC06g34250D	7
biological_process	GO:0009826	unidimensional cell growth	26/3317	367/76374	0.0106834	0.024399	0.0118448	BnaA01g35580D/BnaA02g35060D/BnaA03g01690D/BnaA03g07190D/BnaA03g43080D/BnaA06g16550D/BnaA06g38270D/BnaA08g24970D/BnaA09g31290D/BnaA09g47410D/BnaA10g16380D/BnaA10g24820D/BnaAnng23540D/BnaC01g23810D/BnaC02g08200D/BnaC03g02240D/BnaC03g09110D/BnaC05g34660D/BnaC05g49420D/BnaC07g34350D/BnaC08g15300D/BnaC08g41590D/BnaC09g39240D/BnaC09g49740D/BnaCnng68370D/BnaCnng09530D	26
molecular_function	GO:0003725	double-stranded RNA binding	9/3317	84/76374	0.0106955	0.024399	0.0118448	BnaA01g11500D/BnaA03g44810D/BnaA06g05600D/BnaA08g09620D/BnaA08g26200D/BnaC03g64030D/BnaC05g07140D/BnaC07g36800D/BnaC08g13800D	9
biological_process	GO:0031048	chromatin silencing by small RNA	31/3317	459/76374	0.0109916	0.0250224	0.0121474	BnaA01g24520D/BnaA02g13600D/BnaA03g36790D/BnaA04g18890D/BnaA05g16930D/BnaA05g35190D/BnaA06g12580D/BnaA06g14040D/BnaA06g21560D/BnaA07g11660D/BnaA07g34360D/BnaA08g22640D/BnaA08g31250D/BnaA09g17720D/BnaA09g19860D/BnaC02g17760D/BnaC03g42960D/BnaC03g70510D/BnaC04g12240D/BnaC04g43100D/BnaC04g43110D/BnaC05g14140D/BnaC05g15390D/BnaC06g39190D/BnaC07g48490D/BnaC08g17980D/BnaC08g19040D/BnaC09g18680D/BnaC09g…	31
biological_process	GO:1901701	cellular response to oxygen-containing compound	6/3317	44/76374	0.0114521	0.0260167	0.0126301	BnaA01g27620D/BnaA03g23420D/BnaA06g37000D/BnaC01g35160D/BnaC01g35170D/BnaC09g53060D	6
biological_process	GO:0040007	growth	10/3317	100/76374	0.0117217	0.02631	0.0127725	BnaA03g14000D/BnaA03g14010D/BnaA04g17560D/BnaA04g17570D/BnaA05g11950D/BnaC03g16950D/BnaC03g16960D/BnaC04g14330D/BnaC04g41120D/BnaC04g41130D	10
molecular_function	GO:0008466	glycogenin glucosyltransferase activity	4/3317	21/76374	0.0117494	0.02631	0.0127725	BnaA03g31000D/BnaA05g37110D/BnaC03g36310D/BnaC05g43660D	4
biological_process	GO:0018342	protein prenylation	4/3317	21/76374	0.0117494	0.02631	0.0127725	BnaA04g10140D/BnaA04g11810D/BnaC04g32260D/BnaC04g33950D	4
biological_process	GO:0019509	L-methionine salvage from methylthioadenosine	4/3317	21/76374	0.0117494	0.02631	0.0127725	BnaA10g07100D/BnaAnng29390D/BnaC02g14030D/BnaCnng55890D	4
molecular_function	GO:0031490	chromatin DNA binding	4/3317	21/76374	0.0117494	0.02631	0.0127725	BnaA06g39070D/BnaCnng24550D/BnaCnng78420D/BnaCnng78500D	4
biological_process	GO:0051085	chaperone cofactor-dependent protein refolding	4/3317	21/76374	0.0117494	0.02631	0.0127725	BnaA06g30470D/BnaAnng08020D/BnaC02g38330D/BnaC07g49210D	4
biological_process	GO:0071492	cellular response to UV-A	4/3317	21/76374	0.0117494	0.02631	0.0127725	BnaA03g05650D/BnaA10g18480D/BnaC03g07350D/BnaC09g42060D	4
molecular_function	GO:0030170	pyridoxal phosphate binding	28/3317	407/76374	0.0120166	0.0268535	0.0130363	BnaA01g14030D/BnaA02g14990D/BnaA02g16170D/BnaA03g48400D/BnaA04g08710D/BnaA04g27890D/BnaA06g13600D/BnaA07g14490D/BnaA07g19490D/BnaA09g09630D/BnaA09g31180D/BnaA09g31200D/BnaA10g09090D/BnaAnng22030D/BnaAnng22040D/BnaC01g16530D/BnaC02g19980D/BnaC02g21550D/BnaC04g30980D/BnaC04g34360D/BnaC04g34370D/BnaC05g18610D/BnaC06g43720D/BnaC07g02570D/BnaC07g40410D/BnaC09g31260D/BnaCnng28880D/BnaCnng41850D	28
biological_process	GO:0016311	dephosphorylation	9/3317	86/76374	0.0123772	0.0276029	0.0134001	BnaA01g11500D/BnaA03g44810D/BnaA05g15220D/BnaA08g09620D/BnaC03g64030D/BnaC03g68760D/BnaC05g24120D/BnaC06g08810D/BnaC07g36800D	9
cellular_component	GO:0019898	extrinsic component of membrane	10/3317	101/76374	0.0125177	0.0278595	0.0135247	BnaA01g17490D/BnaA06g05280D/BnaA08g26550D/BnaA09g15410D/BnaAnng20600D/BnaC01g21820D/BnaC01g27280D/BnaC05g06710D/BnaC09g51740D/BnaCnng06680D	10
biological_process	GO:0006312	mitotic recombination	17/3317	214/76374	0.012642	0.0280791	0.0136313	BnaA01g09280D/BnaA04g04150D/BnaA06g12580D/BnaA06g18830D/BnaA07g16360D/BnaA07g16590D/BnaA08g22640D/BnaA09g54800D/BnaA10g24970D/BnaC03g54740D/BnaC04g26340D/BnaC05g14140D/BnaC06g15190D/BnaC06g15560D/BnaC08g17980D/BnaC09g49900D/BnaCnng28910D	17
cellular_component	GO:0000808	origin recognition complex	3/3317	12/76374	0.0134066	0.029717	0.0144264	BnaA05g06960D/BnaCnng40110D/BnaCnng67410D	3
biological_process	GO:0006631	fatty acid metabolic process	7/3317	59/76374	0.013723	0.0303265	0.0147223	BnaA02g07380D/BnaAnng38120D/BnaAnng17300D/BnaC02g10430D/BnaC02g10440D/BnaC03g12340D/BnaCnng69760D	7
biological_process	GO:0009411	response to UV	8/3317	73/76374	0.0137717	0.0303265	0.0147223	BnaA03g06870D/BnaA03g13310D/BnaA10g05840D/BnaA10g16760D/BnaC03g08770D/BnaC03g16120D/BnaC09g39780D/BnaCnng69530D	8
biological_process	GO:0009585	red, far-red light phototransduction	8/3317	73/76374	0.0137717	0.0303265	0.0147223	BnaA03g34390D/BnaA05g22950D/BnaA06g37360D/BnaA08g16920D/BnaC03g39830D/BnaC03g60160D/BnaC05g36390D/BnaC07g47630D	8
molecular_function	GO:0003913	DNA photolyase activity	4/3317	22/76374	0.0138754	0.0303265	0.0147223	BnaA08g27870D/BnaA10g02550D/BnaC05g02520D/BnaC08g00670D	4
molecular_function	GO:0008508	bile acid:sodium symporter activity	4/3317	22/76374	0.0138754	0.0303265	0.0147223	BnaA04g22200D/BnaA05g06370D/BnaC04g06630D/BnaC04g45930D	4
molecular_function	GO:0008967	phosphoglycolate phosphatase activity	4/3317	22/76374	0.0138754	0.0303265	0.0147223	BnaA10g07100D/BnaAnng29390D/BnaC02g14030D/BnaCnng55890D	4
biological_process	GO:0048317	seed morphogenesis	4/3317	22/76374	0.0138754	0.0303265	0.0147223	BnaA06g13370D/BnaA08g22120D/BnaC05g14930D/BnaC08g18690D	4
biological_process	GO:0006310	DNA recombination	12/3317	135/76374	0.0148891	0.0324772	0.0157664	BnaA01g24520D/BnaA03g36790D/BnaA04g05130D/BnaA05g16930D/BnaA07g15850D/BnaA09g33270D/BnaC03g42960D/BnaC06g14240D/BnaC08g24080D/BnaCnng27630D/BnaCnng43520D/BnaCnng50230D	12
molecular_function	GO:0003746	translation elongation factor activity	13/3317	152/76374	0.0155708	0.0337873	0.0164024	BnaA02g01780D/BnaA03g02610D/BnaA03g14270D/BnaA04g18010D/BnaA07g14810D/BnaA10g29870D/BnaAnng06020D/BnaC02g01060D/BnaC02g04920D/BnaC03g17240D/BnaC06g42230D/BnaC09g43450D/BnaCnng27050D	13
biological_process	GO:0071732	cellular response to nitric oxide	11/3317	120/76374	0.0155953	0.0337873	0.0164024	BnaA03g03090D/BnaA03g03100D/BnaA03g57720D/BnaA08g16660D/BnaA10g21570D/BnaAnng24980D/BnaC02g00180D/BnaC03g04510D/BnaC03g44680D/BnaC03g60430D/BnaC09g45760D	11
molecular_function	GO:0008195	phosphatidate phosphatase activity	6/3317	47/76374	0.0156131	0.0337873	0.0164024	BnaA02g35530D/BnaA05g21920D/BnaAnng41910D/BnaC03g74080D/BnaC05g35130D/BnaCnng28030D	6
biological_process	GO:0012501	programmed cell death	6/3317	47/76374	0.0156131	0.0337873	0.0164024	BnaA07g22750D/BnaA07g30710D/BnaA09g19850D/BnaC06g23690D/BnaC06g23700D/BnaC06g34170D	6
biological_process	GO:0003333	amino acid transmembrane transport	17/3317	220/76374	0.0162065	0.0346436	0.0168181	BnaA02g18200D/BnaA03g17600D/BnaA03g23150D/BnaA04g21830D/BnaA05g06540D/BnaA07g20880D/BnaA09g23810D/BnaA09g23820D/BnaA09g43460D/BnaAnng28100D/BnaAnng28110D/BnaC03g21070D/BnaC04g07210D/BnaC04g45700D/BnaC06g20740D/BnaC08g36050D/BnaCnng74340D	17
molecular_function	GO:0004664	prephenate dehydratase activity	4/3317	23/76374	0.0162303	0.0346436	0.0168181	BnaA06g07360D/BnaA08g25130D/BnaC05g08770D/BnaC08g15080D	4
biological_process	GO:0009649	entrainment of circadian clock	4/3317	23/76374	0.0162303	0.0346436	0.0168181	BnaA03g34390D/BnaA05g22950D/BnaC03g39830D/BnaC05g36390D	4
biological_process	GO:0009823	cytokinin catabolic process	4/3317	23/76374	0.0162303	0.0346436	0.0168181	BnaA02g08420D/BnaA10g28940D/BnaC09g33450D/BnaCnng41060D	4
molecular_function	GO:0019139	cytokinin dehydrogenase activity	4/3317	23/76374	0.0162303	0.0346436	0.0168181	BnaA02g08420D/BnaA10g28940D/BnaC09g33450D/BnaCnng41060D	4
molecular_function	GO:0047769	arogenate dehydratase activity	4/3317	23/76374	0.0162303	0.0346436	0.0168181	BnaA06g07360D/BnaA08g25130D/BnaC05g08770D/BnaC08g15080D	4
molecular_function	GO:0052691	UDP-arabinopyranose mutase activity	4/3317	23/76374	0.0162303	0.0346436	0.0168181	BnaA03g31000D/BnaA05g37110D/BnaC03g36310D/BnaC05g43660D	4
biological_process	GO:0007020	microtubule nucleation	20/3317	273/76374	0.0166151	0.0353959	0.0171833	BnaA01g07220D/BnaA01g13560D/BnaA01g17490D/BnaA01g24520D/BnaA03g36790D/BnaA03g49640D/BnaA05g16930D/BnaA09g06920D/BnaA10g22400D/BnaC01g08790D/BnaC01g15780D/BnaC01g21820D/BnaC02g47630D/BnaC03g42960D/BnaC07g50830D/BnaC09g06420D/BnaC09g46960D/BnaCnng27630D/BnaCnng33720D/BnaCnng43520D	20
biological_process	GO:0030307	positive regulation of cell growth	3/3317	13/76374	0.0168731	0.0358062	0.0173825	BnaA06g27100D/BnaA09g04800D/BnaC07g29850D	3
biological_process	GO:0040008	regulation of growth	3/3317	13/76374	0.0168731	0.0358062	0.0173825	BnaA02g05070D/BnaA10g14760D/BnaC09g37130D	3
molecular_function	GO:0035064	methylated histone binding	6/3317	48/76374	0.0172054	0.0364408	0.0176906	BnaA03g01660D/BnaA08g23940D/BnaA09g57040D/BnaC03g02210D/BnaC08g16190D/BnaC08g39560D	6
biological_process	GO:0006338	chromatin remodeling	7/3317	62/76374	0.0176979	0.0374117	0.0181619	BnaA05g22680D/BnaA08g27870D/BnaA10g02550D/BnaC03g71020D/BnaC05g02520D/BnaC05g35950D/BnaC08g00670D	7
molecular_function	GO:0047262	polygalacturonate 4-alpha-galacturonosyltransferase activity	10/3317	107/76374	0.018174	0.0383441	0.0186145	BnaA02g28840D/BnaA04g00880D/BnaA05g01360D/BnaA09g38850D/BnaC04g07440D/BnaC04g21950D/BnaC04g52090D/BnaC08g31110D/BnaCnng75670D/BnaUnng05030D	10
biological_process	GO:0009817	defense response to fungus, incompatible interaction	15/3317	189/76374	0.0184824	0.0389197	0.018894	BnaA01g22680D/BnaA02g21660D/BnaA03g40730D/BnaA03g60240D/BnaA06g09880D/BnaA08g31540D/BnaA09g13700D/BnaC01g29530D/BnaC05g11500D/BnaC07g31660D/BnaC08g14830D/BnaC08g16540D/BnaCnng31840D/BnaCnng60340D/BnaCnng04240D	15
molecular_function	GO:0044212	transcription regulatory region DNA binding	8/3317	77/76374	0.0185439	0.0389743	0.0189205	BnaA03g37140D/BnaA06g14040D/BnaA07g11660D/BnaA08g31250D/BnaC03g43410D/BnaC05g15390D/BnaC07g48490D/BnaC08g19040D	8
biological_process	GO:0022900	electron transport chain	10/3317	108/76374	0.0192742	0.0404315	0.0196279	BnaA03g22350D/BnaA04g15880D/BnaA05g33390D/BnaA07g13260D/BnaAnng12670D/BnaC02g06570D/BnaC03g47090D/BnaC04g16810D/BnaC04g39140D/BnaCnng05900D	10
biological_process	GO:0009410	response to xenobiotic stimulus	22/3317	314/76374	0.0198096	0.0414751	0.0201345	BnaA01g26200D/BnaA03g27200D/BnaA03g35190D/BnaA03g43080D/BnaA06g27100D/BnaA08g29000D/BnaA09g04800D/BnaA10g24100D/BnaAnng36310D/BnaAnng23540D/BnaAnng33510D/BnaC01g43800D/BnaC03g32200D/BnaC07g29850D/BnaC07g34350D/BnaC08g02280D/BnaC09g34980D/BnaC09g48720D/BnaCnng68370D/BnaCnng41320D/BnaCnng67350D/BnaUnng03970D	22
biological_process	GO:0016573	histone acetylation	8/3317	78/76374	0.0199012	0.0415875	0.0201891	BnaA03g43080D/BnaA09g06920D/BnaA10g22400D/BnaAnng23540D/BnaC07g34350D/BnaC09g06420D/BnaC09g46960D/BnaCnng68370D	8
cellular_component	GO:0009295	nucleoid	6/3317	50/76374	0.0207172	0.0427956	0.0207756	BnaA05g28510D/BnaA06g24150D/BnaAnng04730D/BnaC02g43640D/BnaC03g49060D/BnaC05g42830D	6
molecular_function	GO:0008469	histone-arginine N-methyltransferase activity	3/3317	14/76374	0.020792	0.0427956	0.0207756	BnaAnng36410D/BnaAnng21610D/BnaCnng71640D	3
biological_process	GO:0009727	detection of ethylene stimulus	3/3317	14/76374	0.020792	0.0427956	0.0207756	BnaA01g04870D/BnaA03g51900D/BnaC01g06410D	3
molecular_function	GO:0016277	[myelin basic protein]-arginine N-methyltransferase activity	3/3317	14/76374	0.020792	0.0427956	0.0207756	BnaAnng36410D/BnaAnng21610D/BnaCnng71640D	3
biological_process	GO:0019919	peptidyl-arginine methylation, to asymmetrical-dimethyl arginine	3/3317	14/76374	0.020792	0.0427956	0.0207756	BnaAnng36410D/BnaAnng21610D/BnaCnng71640D	3
cellular_component	GO:0030981	cortical microtubule cytoskeleton	3/3317	14/76374	0.020792	0.0427956	0.0207756	BnaA07g16590D/BnaA09g54800D/BnaC06g15560D	3
molecular_function	GO:0035241	protein-arginine omega-N monomethyltransferase activity	3/3317	14/76374	0.020792	0.0427956	0.0207756	BnaAnng36410D/BnaAnng21610D/BnaCnng71640D	3
molecular_function	GO:0035242	protein-arginine omega-N asymmetric methyltransferase activity	3/3317	14/76374	0.020792	0.0427956	0.0207756	BnaAnng36410D/BnaAnng21610D/BnaCnng71640D	3
biological_process	GO:0006396	RNA processing	31/3317	483/76374	0.0209493	0.0430383	0.0208934	BnaA01g18460D/BnaA03g31770D/BnaA03g41950D/BnaA04g05150D/BnaA05g07950D/BnaA05g27510D/BnaA06g18830D/BnaA07g00910D/BnaA07g15820D/BnaA07g19490D/BnaA09g33260D/BnaA09g40600D/BnaA10g18760D/BnaAnng01070D/BnaC02g28370D/BnaC03g37230D/BnaC03g54740D/BnaC03g55610D/BnaC03g74200D/BnaC04g08950D/BnaC04g27750D/BnaC05g41670D/BnaC06g14200D/BnaC06g14210D/BnaC07g01190D/BnaC07g33050D/BnaC08g24070D/BnaC08g33050D/BnaC09g…	31
cellular_component	GO:0000228	nuclear chromosome	4/3317	25/76374	0.0216531	0.0442353	0.0214745	BnaA05g22680D/BnaA10g24970D/BnaC05g35950D/BnaC09g49900D	4
biological_process	GO:0007021	tubulin complex assembly	4/3317	25/76374	0.0216531	0.0442353	0.0214745	BnaA02g15430D/BnaA07g29350D/BnaC02g20670D/BnaC06g32550D	4
molecular_function	GO:0008812	choline dehydrogenase activity	4/3317	25/76374	0.0216531	0.0442353	0.0214745	BnaA02g16200D/BnaA07g22900D/BnaC02g21680D/BnaC06g23880D	4
biological_process	GO:0002238	response to molecule of fungal origin	12/3317	144/76374	0.0234938	0.0479064	0.0232567	BnaA02g27720D/BnaA06g33220D/BnaA07g34520D/BnaA10g20620D/BnaAnng25230D/BnaAnng33110D/BnaC02g04170D/BnaC02g35830D/BnaC06g39360D/BnaC07g23140D/BnaC09g44650D/BnaCnng66370D	12
biological_process	GO:0006184	obsolete GTP catabolic process	31/3317	489/76374	0.02431	0.0494785	0.0240199	BnaA02g01780D/BnaA02g04460D/BnaA02g04470D/BnaA02g35070D/BnaA03g02610D/BnaA03g07730D/BnaA03g07740D/BnaA03g14270D/BnaA04g18010D/BnaA07g14810D/BnaA08g27360D/BnaA09g40600D/BnaA10g15400D/BnaA10g15410D/BnaA10g29870D/BnaAnng06020D/BnaC02g01060D/BnaC02g04920D/BnaC02g08190D/BnaC02g09000D/BnaC02g09010D/BnaC03g09730D/BnaC03g09740D/BnaC03g17240D/BnaC06g42230D/BnaC08g00140D/BnaC08g33050D/BnaC09g37880D/BnaC09g…	31

## Sheet: Table S6
Table S6. The KEGG pathway analysis results of interacting proteins.
ID	Description	GeneRatio	BgRatio	pvalue	p.adjust	qvalue	geneID	Count
ko00400	Phenylalanine, tyrosine and tryptophan biosynthesis	58/1597	193/33115	3.03569e-30	2.06427e-28	1.40601e-28	BnaA01g16120D/BnaA02g23570D/BnaA03g01690D/BnaA03g21950D/BnaA03g48400D/BnaA03g57920D/BnaA04g08710D/BnaA04g27890D/BnaA05g36390D/BnaA06g07360D/BnaA06g13600D/BnaA06g30380D/BnaA07g14490D/BnaA08g02980D/BnaA08g25130D/BnaA08g25210D/BnaA08g25220D/BnaA09g00950D/BnaA09g09540D/BnaA09g09550D/BnaA09g09630D/BnaA09g34470D/BnaA10g09090D/BnaA10g24820D/BnaAnng41580D/BnaC02g27920D/BnaC02g41270D/BnaC03g02240D/BnaC03g…	58
ko00199	Cytochrome P450	78/1597	415/33115	2.98956e-25	1.01645e-23	6.92319e-24	BnaA01g00540D/BnaA01g35580D/BnaA02g07380D/BnaA02g27890D/BnaA02g31830D/BnaA03g14000D/BnaA03g14010D/BnaA03g19280D/BnaA03g22900D/BnaA03g30890D/BnaA03g30920D/BnaA04g17560D/BnaA04g17570D/BnaA04g23600D/BnaA04g26280D/BnaA04g26290D/BnaA05g01910D/BnaA05g04960D/BnaA05g11950D/BnaA06g07270D/BnaA06g08740D/BnaA06g27960D/BnaA06g38770D/BnaA08g15660D/BnaA08g31650D/BnaA09g06580D/BnaA09g31290D/BnaA09g38870D/BnaA09g…	78
ko00260	Glycine, serine and threonine metabolism	61/1597	295/33115	3.08415e-22	6.99075e-21	4.7615e-21	BnaA01g16120D/BnaA01g21340D/BnaA01g36150D/BnaA02g05770D/BnaA02g16170D/BnaA02g18710D/BnaA02g24710D/BnaA03g16100D/BnaA03g40860D/BnaA03g48400D/BnaA04g08710D/BnaA04g27890D/BnaA05g08820D/BnaA06g13600D/BnaA07g14490D/BnaA07g19490D/BnaA07g33900D/BnaA08g25210D/BnaA08g25220D/BnaA09g00950D/BnaA09g09540D/BnaA09g09550D/BnaA09g09630D/BnaA09g34470D/BnaA10g09090D/BnaA10g26070D/BnaAnng14300D/BnaAnng15720D/BnaAnng…	61
ko02010	ABC transporters	25/1597	108/33115	4.54334e-11	7.02612e-10	4.78559e-10	BnaA01g08290D/BnaA02g29270D/BnaA02g29470D/BnaA03g09840D/BnaA03g16880D/BnaA04g21150D/BnaA04g26870D/BnaA06g31250D/BnaA06g31620D/BnaA06g39710D/BnaA09g02390D/BnaA10g12020D/BnaC01g09840D/BnaC02g37330D/BnaC02g37560D/BnaC02g37570D/BnaC03g12470D/BnaC03g20400D/BnaC04g00490D/BnaC04g51510D/BnaC07g25030D/BnaC07g26150D/BnaC09g01920D/BnaC09g33710D/BnaCnng45670D	25
ko00380	Tryptophan metabolism	36/1597	213/33115	5.16627e-11	7.02612e-10	4.78559e-10	BnaA01g04490D/BnaA01g08170D/BnaA01g14030D/BnaA02g00930D/BnaA02g14990D/BnaA02g31890D/BnaA06g03430D/BnaA06g03450D/BnaA06g39380D/BnaA08g12160D/BnaA08g13610D/BnaA09g04510D/BnaA09g31180D/BnaA09g31200D/BnaAnng37780D/BnaAnng41850D/BnaAnng22030D/BnaAnng22040D/BnaAnng30060D/BnaC01g05950D/BnaC01g09750D/BnaC01g16530D/BnaC02g19980D/BnaC02g48550D/BnaC03g67260D/BnaC05g18610D/BnaC06g02330D/BnaC06g40880D/BnaC06g…	36
ko00100	Steroid biosynthesis	27/1597	135/33115	2.72916e-10	3.09305e-09	2.10672e-09	BnaA01g25880D/BnaA05g15860D/BnaA05g19350D/BnaA06g02910D/BnaA06g07270D/BnaA06g14200D/BnaA08g02140D/BnaA08g31650D/BnaAnng33870D/BnaAnng33880D/BnaAnng14740D/BnaC01g33070D/BnaC01g44720D/BnaC03g68620D/BnaC05g15570D/BnaC05g26480D/BnaC05g26490D/BnaC05g32840D/BnaC06g03410D/BnaC06g03450D/BnaC06g03470D/BnaC07g14860D/BnaC08g07160D/BnaCnng75820D/BnaCnng41000D/BnaCnng41010D/BnaCnng18080D	27
ko00945	Stilbenoid, diarylheptanoid and gingerol biosynthesis	16/1597	48/33115	4.13651e-10	4.01832e-09	2.73694e-09	BnaA03g14000D/BnaA03g14010D/BnaA03g19280D/BnaA04g17560D/BnaA04g17570D/BnaA04g23600D/BnaA05g01910D/BnaA05g11950D/BnaC03g16950D/BnaC03g16960D/BnaC03g22980D/BnaC04g01610D/BnaC04g14330D/BnaC04g41120D/BnaC04g41130D/BnaC04g47480D	16
ko00405	Phenazine biosynthesis	7/1597	12/33115	3.82957e-07	3.25514e-06	2.21712e-06	BnaA03g01690D/BnaA03g21950D/BnaA10g24820D/BnaC03g02240D/BnaC03g26270D/BnaC04g23920D/BnaC09g49740D	7
ko00941	Flavonoid biosynthesis	18/1597	102/33115	1.72539e-06	1.30363e-05	8.87921e-06	BnaA03g14000D/BnaA03g14010D/BnaA03g19280D/BnaA04g17560D/BnaA04g17570D/BnaA04g23600D/BnaA05g01910D/BnaA05g11950D/BnaA10g23330D/BnaC03g16950D/BnaC03g16960D/BnaC03g22980D/BnaC04g01610D/BnaC04g14330D/BnaC04g41120D/BnaC04g41130D/BnaC04g47480D/BnaC09g47980D	18
ko04090	CD molecules	19/1597	124/33115	7.8581e-06	5.34351e-05	3.63954e-05	BnaA02g29270D/BnaA02g29470D/BnaA03g16880D/BnaA04g21150D/BnaA04g26870D/BnaA06g31250D/BnaA06g31620D/BnaA06g39710D/BnaA09g02390D/BnaC02g37330D/BnaC02g37560D/BnaC02g37570D/BnaC03g20400D/BnaC04g00490D/BnaC04g51510D/BnaC07g25030D/BnaC07g26150D/BnaC09g01920D/BnaCnng45670D	19
ko00040	Pentose and glucuronate interconversions	37/1597	359/33115	1.30764e-05	8.08361e-05	5.50586e-05	BnaA02g02490D/BnaA03g05190D/BnaA03g27540D/BnaA03g29100D/BnaA04g07000D/BnaA05g31600D/BnaA06g29660D/BnaA06g30420D/BnaA08g05020D/BnaA08g18320D/BnaA08g18330D/BnaA08g27230D/BnaA09g51170D/BnaA10g01390D/BnaA10g18990D/BnaAnng02770D/BnaC02g38360D/BnaC03g06740D/BnaC03g32550D/BnaC03g34350D/BnaC03g34360D/BnaC03g58640D/BnaC03g58650D/BnaC03g58660D/BnaC03g75750D/BnaC05g01430D/BnaC05g46150D/BnaC07g27100D/BnaC07g…	37
ko00590	Arachidonic acid metabolism	13/1597	76/33115	6.48921e-05	0.000367722	0.000250461	BnaA01g37280D/BnaA02g21680D/BnaA03g14580D/BnaA03g20200D/BnaA05g11240D/BnaA09g21570D/BnaAnng31150D/BnaC03g17600D/BnaC03g24130D/BnaC08g33590D/BnaCnng27540D/BnaCnng08430D/BnaCnng67520D	13
ko00460	Cyanoamino acid metabolism	26/1597	265/33115	0.000509356	0.00266432	0.00181471	BnaA03g30810D/BnaA04g00410D/BnaA04g17070D/BnaA04g25720D/BnaA05g04000D/BnaA05g04020D/BnaA05g29140D/BnaA05g29150D/BnaA05g34490D/BnaA07g19420D/BnaA07g19490D/BnaA08g03680D/BnaA08g06920D/BnaC03g36110D/BnaC04g03740D/BnaC04g03750D/BnaC04g49630D/BnaC04g55020D/BnaC05g43610D/BnaC05g43620D/BnaC06g18580D/BnaCnng75040D/BnaCnng33520D/BnaCnng39140D/BnaUnng02930D/BnaUnng03130D	26
ko00999	Biosynthesis of secondary metabolites - unclassified	10/1597	60/33115	0.000550126	0.00267204	0.00181997	BnaA03g14000D/BnaA03g14010D/BnaA04g17560D/BnaA04g17570D/BnaA05g11950D/BnaC03g16950D/BnaC03g16960D/BnaC04g14330D/BnaC04g41120D/BnaC04g41130D	10
ko03022	Basal transcription factors	20/1597	188/33115	0.000797426	0.003615	0.00246223	BnaA03g55430D/BnaA03g55450D/BnaA03g55460D/BnaA05g13730D/BnaA08g00420D/BnaA08g28950D/BnaA09g49410D/BnaA09g49590D/BnaA10g04870D/BnaAnng01780D/BnaC02g01920D/BnaC03g02660D/BnaC03g02670D/BnaC03g70590D/BnaC05g39930D/BnaC06g10970D/BnaC06g41680D/BnaC08g02230D/BnaC08g45230D/BnaC08g45360D	20
ko99995	Signaling proteins	9/1597	54/33115	0.00102974	0.00437641	0.00298084	BnaA02g01780D/BnaA03g14270D/BnaA04g18010D/BnaA10g29870D/BnaC02g04920D/BnaC03g17240D/BnaC08g10540D/BnaC09g43450D/BnaCnng27050D	9
ko04030	G protein-coupled receptors	9/1597	57/33115	0.00153084	0.00612337	0.00417072	BnaA01g22680D/BnaA03g60240D/BnaA04g19660D/BnaA09g13700D/BnaC01g29530D/BnaC04g44040D/BnaC08g14830D/BnaCnng31840D/BnaCnng04240D	9
ko00053	Ascorbate and aldarate metabolism	17/1597	163/33115	0.00234692	0.00886613	0.00603885	BnaA01g29840D/BnaA02g21430D/BnaA03g32800D/BnaA03g52000D/BnaA05g25900D/BnaA06g00300D/BnaA08g29220D/BnaA10g10540D/BnaA10g29650D/BnaAnng28640D/BnaC01g37690D/BnaC03g37900D/BnaC03g70650D/BnaC05g39980D/BnaC06g07290D/BnaC07g43770D/BnaC09g53590D	17
ko00073	Cutin, suberine and wax biosynthesis	13/1597	133/33115	0.0121877	0.0435699	0.0296761	BnaA02g07380D/BnaA02g16200D/BnaA06g22710D/BnaA07g22900D/BnaAnng38120D/BnaAnng17300D/BnaC02g10430D/BnaC02g10440D/BnaC02g21680D/BnaC03g12340D/BnaC03g74670D/BnaC06g23880D/BnaCnng69760D	13
ko00010	Glycolysis / Gluconeogenesis	34/1597	470/33115	0.0128147	0.0435699	0.0296761	BnaA01g21340D/BnaA02g05770D/BnaA02g11520D/BnaA02g18710D/BnaA02g24710D/BnaA03g13490D/BnaA03g40860D/BnaA07g10480D/BnaA07g20300D/BnaA07g31190D/BnaA07g33900D/BnaA08g20830D/BnaA10g05930D/BnaA10g26070D/BnaAnng14300D/BnaAnng00920D/BnaC02g02760D/BnaC02g16000D/BnaC02g24750D/BnaC02g25850D/BnaC02g32750D/BnaC03g16370D/BnaC04g56920D/BnaC06g19790D/BnaC06g34880D/BnaC06g38530D/BnaC07g13740D/BnaC07g13990D/BnaC07g…	34
ko00660	C5-Branched dibasic acid metabolism	6/1597	42/33115	0.0147646	0.0478091	0.0325634	BnaA04g06890D/BnaA08g05070D/BnaC06g15430D/BnaC08g47120D/BnaC09g05620D/BnaCnng15040D	6

## Sheet: Table S7
Table S7. SNPs of the SRS genes identified in 324 B. napus accessions.
Chr	Start	End	length	Gene ID	SNP number	Subgroup	SNP location	C16.0	C18.0	C18.1	C18.2	C18.3	C20.1	C22.1	GLU	Protein	TSW	FFT
chrA01	720686	722006	1321	BnSRS1	3	II	721123;721512									Significant	Significant	Significant
chrA01	11065464	11066171	708	BnSRS2	0	II
chrA02	10389281	10390641	1361	BnSRS3	1	III
chrA03_random	2229242	2230705	1464	BnSRS4	3	II	2230528										Significant
chrA04	3030235	3031741	1507	BnSRS5	35	I
chrA04	10369800	10370837	1038	BnSRS6	1	III
chrA06	7408944	7410219	1276	BnSRS7	9	III	7408977;7408980;7409087;7409719										Significant
chrA07	1553611	1554592	982	BnSRS8	6	II	1554350;1554395;1554513									Significant		Significant
chrA07	11402203	11403782	1580	BnSRS9	16	II
chrA07	16733414	16734764	1351	BnSRS10	1	III
chrA09	23636882	23637619	738	BnSRS11	0	II
chrA09	25167663	25169116	1454	BnSRS12	1	I
chrA09	29990289	29991927	1639	BnSRS13	15	III
chrA10	14277820	14279260	1441	BnSRS14	17	IV	14277823;14277921;14279098		Significant									Significant
chrAnn_random	9661490	9663295	1806	BnSRS15	0	III
chrAnn_random	36117897	36119512	1616	BnSRS16	3	III	36118311;36118633;36118756				Significant
chrC01	1234399	1235824	1426	BnSRS17	13	II	1234482;1234939;1235067;1235619		Significant	Significant			Significant	Significant	Significant
chrC01	30654902	30658530	3629	BnSRS18	0	III
chrC02	6883504	6884485	982	BnSRS19	0	II
chrC02	21599447	21600814	1368	BnSRS20	0	III
chrC04	27700142	27701200	1059	BnSRS21	1	I
chrC06	24385239	24386614	1376	BnSRS22	3	III	24385892									Significant
chrC06_random	3329330	3330945	1616	BnSRS23	0	III
chrC07	4955888	4956867	980	BnSRS24	0	II
chrC07	8725293	8727060	1768	BnSRS25	12	III
chrC07	21603710	21605341	1632	BnSRS26	0	III
chrC07	22808152	22809699	1548	BnSRS27	2	II
chrC08	27029253	27030901	1649	BnSRS28	8	I
chrC08	33420292	33421443	1152	BnSRS29	2	III	33421218		Significant
chrC08_random	3408963	3410201	1239	BnSRS30	0	II
chrC09	45250806	45252450	1645	BnSRS31	0	IV
chrCnn_random	56981639	56982915	1277	BnSRS32	0	III
chrCnn_random	61059431	61060770	1340	BnSRS33	16	II	61059589;61059755;61059953;61059988;61060357	Significant	Significant	Significant	Significant	Significant	Significant	Significant	Significant
chrCnn_random	70296790	70299037	2248	BnSRS34	0	IV
